# Supplementary material for: CBr4 promoted intramolecular aerobic oxidative dehydrogenative arylation of aldehydes: application in the synthesis of xanthones and fluorenones
Source: Royal Society of Chemistry journal article supplement (doi:10.1039/c7ob00080d), 2017-01-01

**CBr<sub>4</sub> Promoted Intramolecular Aerobic Oxidative Dehydrogenative Arylation of Aldehydes:  
Applied in the Synthesis of Xanthenes and Fluorenones**

Jing Tang,<sup>a</sup> Shijun Zhao,<sup>b</sup> Yuanyuan Wei,<sup>a</sup> Congde Huo<sup>\*,a</sup>

<sup>a</sup> College of Chemistry and Chemical Engineering, Northwest Normal University, Lanzhou, Gansu 730070, China. <sup>b</sup> College of Foreign Languages, Lanzhou University of Technology, Lanzhou, Gansu 730050, China.

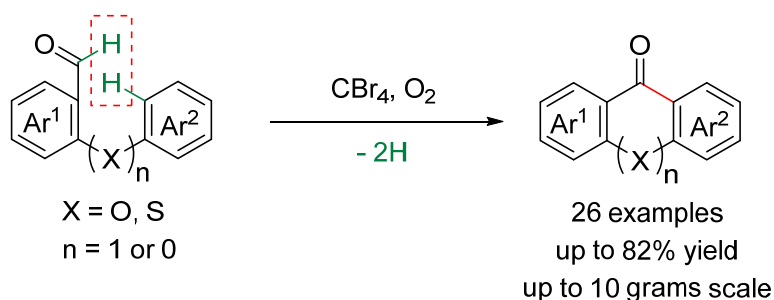

**Supporting Information**

**Table of Contents**

**Experimental Section.....(Page 01)**

**Characterizations of compounds.....(Page 02-11)**

**NMR spectra of the products.....(Page 12-66)**

## Experimental Section

*General procedure for the preparation of xanthenes and fluorenones.*

A mixture of **1** (1.0 mmol) and CBr<sub>4</sub> (1.2 mmol) was stirred at 140°C under oxygen atmosphere (O<sub>2</sub> balloon). The reactions were completed as monitored by TLC. Products **2** were isolated by silica gel column chromatography using petroleum ether/acetone (v/v 100:1 to 50:1).

### Characterization of the products

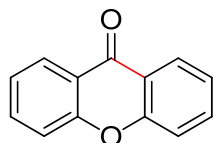

*9H-xanthen-9-one (2a)*<sup>3</sup>

The desired pure product was obtained in 60% yield (118 mg) as a white solid, mp 177-178°C. <sup>1</sup>H NMR (600 MHz, CDCl<sub>3</sub>) δ 8.34 (dd, *J* = 7.9, 1.2 Hz, 2H), 7.76 – 7.68 (m, 2H), 7.49 (d, *J* = 8.0 Hz, 2H), 7.42 – 7.33 (m, 2H). <sup>13</sup>C NMR (151 MHz, CDCl<sub>3</sub>) δ 177.2, 156.1, 134.8, 126.7, 123.9, 121.8, 117.9.

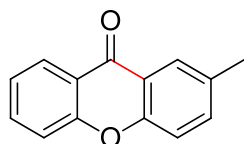

*2-methyl-9H-xanthen-9-one (2b)*<sup>3</sup>

The desired pure product was obtained in 65% yield (137 mg) as a white solid, mp 124-125°C. <sup>1</sup>H NMR (600 MHz, CDCl<sub>3</sub>) δ 8.33 (d, *J* = 7.9 Hz, 1H), 8.11 (s, 1H), 7.70 (t, *J* = 7.7 Hz, 1H), 7.52 (d, *J* = 8.4 Hz, 1H), 7.46 (d, *J* = 8.4 Hz, 1H), 7.36 (m, 2H), 2.46 (s, 3H). <sup>13</sup>C NMR (151 MHz, CDCl<sub>3</sub>) δ 177.1, 156.1, 154.3, 136.0, 134.5, 133.6, 126.6, 125.9, 123.6, 121.7, 121.4, 117.9, 117.7, 20.8.

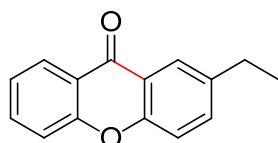

*2-ethyl-9H-xanthen-9-one (2c)*<sup>4</sup>

The desired pure product was obtained in 43% yield (97 mg) as a white solid, mp 71-72°C. <sup>1</sup>H NMR (600 MHz, CDCl<sub>3</sub>) δ 8.34 (d, *J* = 7.9 Hz, 1H), 8.15 (s, 1H), 7.73 – 7.67 (m, 1H), 7.56 (d, *J* = 8.5 Hz, 1H), 7.47 (d, *J* = 8.3 Hz, 1H), 7.41 (dd, *J* = 8.5, 2.1 Hz, 1H), 7.36 (m, 1H), 2.77 (q, *J* = 7.6 Hz, 2H), 1.34 – 1.27 (t, *J* = 7.6 Hz, 3H). <sup>13</sup>C NMR (151 MHz, CDCl<sub>3</sub>) δ 177.3, 156.2, 154.5, 140.0, 135.0, 134.6, 126.7, 124.8, 123.7, 121.8, 121.5, 117.9, 117.8, 28.3, 15.5.

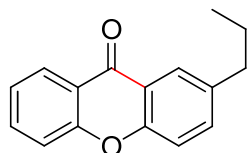

*2-propyl-9H-xanthen-9-one (2d)*

The desired pure product was obtained in 48% yield (115 mg) as a white solid, mp 74-75°C. <sup>1</sup>H NMR (600 MHz, CDCl<sub>3</sub>) δ 8.34 (d, *J* = 7.9 Hz, 1H), 8.12 (s, 1H), 7.70 (m, 1H), 7.54 (d, *J* = 8.5 Hz, 1H), 7.47 (d, *J* = 8.4 Hz, 1H), 7.40 (d, *J* = 8.5 Hz, 1H), 7.36 (t, *J* = 7.5 Hz, 1H), 2.71 (t, *J* = 7.6 Hz, 2H), 1.75 – 1.66 (m, 2H), 0.96 (t, *J* = 7.3 Hz, 3H). <sup>13</sup>C NMR (151 MHz, CDCl<sub>3</sub>) δ 177.3, 156.2, 154.6, 138.5, 135.5, 134.6, 126.7, 125.5, 123.7, 121.8, 121.5, 117.9, 117.7, 37.3, 24.4, 13.7. HRMS (ESI) exact mass calcd for C<sub>16</sub>H<sub>15</sub>O<sub>2</sub> [M+H] m/z 239.1072, found 239.1068.

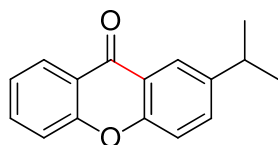

*2-isopropyl-9H-xanthen-9-one (2e)*

The desired pure product was obtained in 42% yield (101 mg) as a yellow oil. <sup>1</sup>H NMR (600 MHz, CDCl<sub>3</sub>) δ 8.36 (dd, *J* = 8.0, 1.5 Hz, 1H), 8.19 (d, *J* = 2.1 Hz, 1H), 7.74 – 7.70 (m, 1H), 7.62 (dd, *J* = 8.6, 2.3 Hz, 1H), 7.49 (d, *J* = 8.4 Hz, 1H), 7.44 (d, *J* = 8.6 Hz, 1H), 7.37 (t, *J* = 7.5 Hz, 1H), 3.10 – 3.02 (m, 1H), 1.33 (d, *J* = 6.9 Hz, 6H). <sup>13</sup>C NMR (151 MHz, CDCl<sub>3</sub>) δ 177.4, 156.2, 154.6, 144.7, 134.6, 133.7, 126.7, 123.7, 123.4, 121.8, 121.5, 117.9, 117.8, 33.7, 24.0. HRMS (ESI) exact mass calcd for C<sub>16</sub>H<sub>15</sub>O<sub>2</sub> [M+H] m/z 239.1072, found 239.1077.

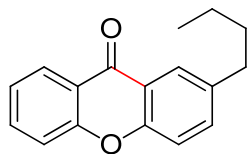

*2-butyl-9H-xanthen-9-one (2f)*

The desired pure product was obtained in 53% yield (134 mg) as a white solid, mp 60-62°C. <sup>1</sup>H NMR (600 MHz, CDCl<sub>3</sub>) δ 8.34 (dd, *J* = 7.9, 1.4 Hz, 1H), 8.13 (d, *J* = 1.7 Hz, 1H), 7.73 – 7.68 (m, 1H), 7.54 (dd, *J* = 8.5, 2.0 Hz, 1H), 7.47 (d, *J* = 8.4 Hz, 1H), 7.40 (d, *J* = 8.5 Hz, 1H), 7.36 (t, *J* = 7.5 Hz, 1H), 2.73 (t, *J* = 7.8 Hz, 2H), 1.70 – 1.62 (m, 2H), 1.41 – 1.33 (m, 2H), 0.94 (t, *J* = 7.4 Hz, 3H). <sup>13</sup>C NMR (151 MHz, CDCl<sub>3</sub>) δ 177.3, 156.2, 154.5, 138.7, 135.5, 134.6, 126.7, 125.4, 123.7, 121.8, 121.5, 117.9, 117.7, 34.9, 33.5, 22.2, 13.9. HRMS (ESI) exact mass calcd for C<sub>17</sub>H<sub>17</sub>O<sub>2</sub> [M+H] m/z 253.1229, found 253.1233.

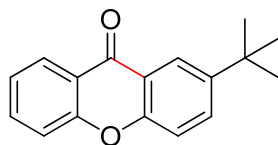

*2-(tert-butyl)-9H-xanthen-9-one (2g)*<sup>3</sup>

The desired pure product was obtained in 73% yield (184 mg) as a white solid, mp 114-115°C. <sup>1</sup>H NMR (600 MHz, CDCl<sub>3</sub>) δ 8.35 (dd, *J* = 8.0, 1.6 Hz, 1H), 8.32 (d, *J* = 2.5 Hz, 1H), 7.78 (dd, *J* = 8.8, 2.5 Hz, 1H), 7.70 (m, 1H), 7.48 (d, *J* = 8.3 Hz, 1H), 7.43 (d, *J* = 8.8 Hz, 1H), 7.38 – 7.34 (m, 1H), 1.40 (s, 9H). <sup>13</sup>C NMR (151 MHz, CDCl<sub>3</sub>) δ 177.4, 156.1, 154.3, 147.0, 134.6, 132.7, 126.7, 123.7, 122.4, 121.8, 121.1, 117.9, 117.6, 34.7, 31.3.

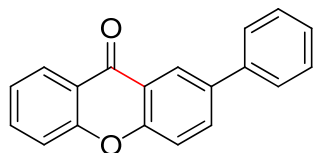

*2-phenyl-9H-xanthen-9-one (2h)*<sup>3</sup>

The desired pure product was obtained in 80% yield (219 mg) as a white solid, mp 158-160°C. <sup>1</sup>H NMR (600 MHz, CDCl<sub>3</sub>) δ 8.56 (s, 1H), 8.37 (d, *J* = 7.9 Hz, 1H), 7.99 – 7.94 (m, 1H), 7.73 (m, 1H),

7.68 (d,  $J = 7.9$  Hz, 2H), 7.58 – 7.54 (m, 1H), 7.53 – 7.45 (m, 3H), 7.41 – 7.37 (m, 2H).  $^{13}\text{C}$  NMR (151 MHz,  $\text{CDCl}_3$ )  $\delta$  177.2, 156.1, 155.5, 139.4, 137.0, 134.8, 133.6, 129.0, 127.7, 127.1, 126.8, 124.5, 124.0, 121.9, 121.8, 118.5, 118.0.

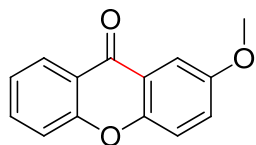

*2-methoxy-9H-xanthen-9-one (2i)*<sup>3</sup>

The desired pure product was obtained in 38% yield (86 mg) as a white solid, mp 132-133°C.  $^1\text{H}$  NMR (600 MHz,  $\text{CDCl}_3$ )  $\delta$  8.35 (dd,  $J = 8.0, 1.5$  Hz, 1H), 7.74 – 7.70 (m, 2H), 7.49 (d,  $J = 8.4$  Hz, 1H), 7.44 (d,  $J = 9.1$  Hz, 1H), 7.38 (t,  $J = 7.5$  Hz, 1H), 7.33 (m, 1H), 3.92 (s, 3H).  $^{13}\text{C}$  NMR (151 MHz,  $\text{CDCl}_3$ )  $\delta$  177.1, 156.1, 156.0, 151.0, 134.6, 126.7, 124.9, 123.7, 122.1, 121.2, 119.4, 117.9, 105.8, 55.9.

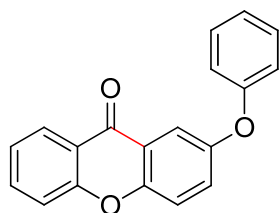

*2-phenoxy-9H-xanthen-9-one (2j)*<sup>3</sup>

The desired pure product was obtained in 35% yield (101 mg) as a white solid, mp 75-76°C.  $^1\text{H}$  NMR (600 MHz,  $\text{CDCl}_3$ )  $\delta$  8.32 (d,  $J = 7.9$  Hz, 1H), 7.87 (d,  $J = 2.4$  Hz, 1H), 7.73 (t,  $J = 7.7$  Hz, 1H), 7.51 (t,  $J = 8.2$  Hz, 2H), 7.48 – 7.44 (m, 1H), 7.38 (m, 3H), 7.15 (t,  $J = 7.4$  Hz, 1H), 7.05 (d,  $J = 8.2$  Hz, 2H).  $^{13}\text{C}$  NMR (151 MHz,  $\text{CDCl}_3$ )  $\delta$  176.7, 156.9, 156.1, 153.6, 152.1, 134.8, 132.9, 130.0, 126.8, 126.7, 123.9, 123.8, 122.5, 121.2, 120.6, 119.7, 119.0, 117.9, 114.1.

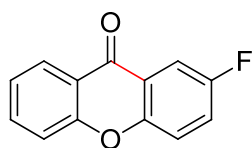

*2-fluoro-9H-xanthen-9-one (2k)*<sup>1</sup>

The desired pure product was obtained in 62% yield (133 mg) as a white solid, mp 136-138°C. <sup>1</sup>H NMR (600 MHz, CDCl<sub>3</sub>) δ 8.31 (dd, *J* = 8.0, 1.5 Hz, 1H), 7.95 (dd, *J* = 8.2, 3.1 Hz, 1H), 7.73 (m, 1H), 7.51 – 7.46 (m, 2H), 7.44 (m, 1H), 7.40 – 7.36 (m, 1H). <sup>13</sup>C NMR (151 MHz, CDCl<sub>3</sub>) δ 176.5, 176.5, 159.5, 157.9, 156.1, 152.3, 152.3, 135.1, 126.7, 124.1, 123.0, 122.8, 121.0, 120.0, 119.9, 118.0, 111.5, 111.3.

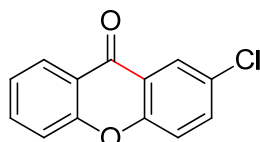

*2-chloro-9H-xanthen-9-one (2l)*<sup>1</sup>

The desired pure product was obtained in 67% yield (155 mg) as a white solid, mp 175-176°C. <sup>1</sup>H NMR (600 MHz, CDCl<sub>3</sub>) δ 8.31 (dd, *J* = 8.0, 1.5 Hz, 1H), 8.27 (d, *J* = 2.6 Hz, 1H), 7.73 (m, 1H), 7.64 (dd, *J* = 8.9, 2.6 Hz, 1H), 7.49 – 7.46 (d, *J* = 8.4, 1H), 7.44 (d, *J* = 8.9 Hz, 1H), 7.41 – 7.36 (m, 1H). <sup>13</sup>C NMR (151 MHz, CDCl<sub>3</sub>) δ 176.1, 156.0, 154.4, 135.1, 134.9, 129.7, 126.8, 126.0, 124.2, 122.7, 121.4, 119.7, 118.0.

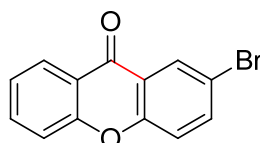

*2-bromo-9H-xanthen-9-one (2m)*<sup>2</sup>

The desired pure product was obtained in 52% yield (143 mg) as a white solid, mp 154-155°C. <sup>1</sup>H NMR (600 MHz, CDCl<sub>3</sub>) δ 8.43 (d, *J* = 2.3 Hz, 1H), 8.31 (d, *J* = 7.9 Hz, 1H), 7.80 – 7.76 (m, 1H), 7.73 (m, 1H), 7.48 (d, *J* = 8.4 Hz, 1H), 7.39 (t, *J* = 8.0 Hz, 2H). <sup>13</sup>C NMR (151 MHz, CDCl<sub>3</sub>) δ 175.9, 156.0, 154.9, 137.6, 135.2, 129.2, 126.8, 124.3, 123.1, 121.5, 120.0, 118.0, 117.0.

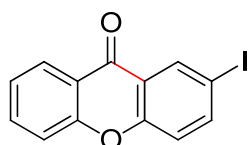

*2-iodo-9H-xanthen-9-one (2n)*<sup>5</sup>

The desired pure product was obtained in 50% yield (162 mg) as a white solid, mp 140-142°C. <sup>1</sup>H NMR (600 MHz, CDCl<sub>3</sub>) δ 8.62 (d, *J* = 2.2 Hz, 1H), 8.30 (dd, *J* = 7.9, 1.5 Hz, 1H), 7.95 (dd, *J* = 8.8, 2.2 Hz, 1H), 7.73 (m, 1H), 7.47 (d, *J* = 8.4 Hz, 1H), 7.41 – 7.35 (m, 1H), 7.25 (d, *J* = 8.8 Hz, 1H). <sup>13</sup>C NMR (151 MHz, CDCl<sub>3</sub>) δ 175.7, 156.0, 155.6, 143.2, 135.5, 135.1, 126.8, 124.2, 123.5, 121.6, 120.1, 118.0, 87.2.

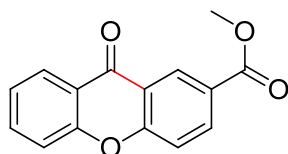*Methyl 9-oxo-9H-xanthen-2-carboxylate (2o)*<sup>1</sup>

The desired pure product was obtained in 39% yield (100 mg) as a white solid, mp 229-230°C. <sup>1</sup>H NMR (600 MHz, CDCl<sub>3</sub>) δ 8.99 (d, *J* = 1.9 Hz, 1H), 8.37 – 8.29 (m, 2H), 7.76 – 7.71 (m, 1H), 7.51 (m, 2H), 7.40 (t, *J* = 7.5 Hz, 1H), 3.96 (s, 3H). <sup>13</sup>C NMR (151 MHz, CDCl<sub>3</sub>) δ 176.5, 165.8, 158.7, 155.9, 135.3, 135.2, 129.3, 126.8, 126.0, 124.5, 121.8, 121.4, 118.4, 118.0, 52.4.

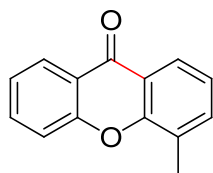*4-methyl-9H-xanthen-9-one (2p)*<sup>3</sup>

The desired pure product was obtained in 50% yield (105 mg) as a white solid, mp 122-123°C. <sup>1</sup>H NMR (600 MHz, CDCl<sub>3</sub>) δ 8.34 (d, *J* = 7.9 Hz, 1H), 8.19 (d, *J* = 7.9 Hz, 1H), 7.75 – 7.70 (m, 1H), 7.58 – 7.51 (m, 2H), 7.38 (t, *J* = 7.5 Hz, 1H), 7.27 (m, 1H), 2.56 (s, 3H). <sup>13</sup>C NMR (151 MHz, CDCl<sub>3</sub>) δ 177.5, 156.0, 154.5, 135.7, 134.6, 127.2, 126.7, 124.3, 123.8, 123.4, 121.7, 121.6, 118.0, 15.8.

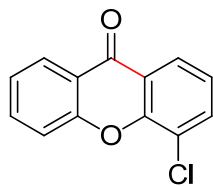

*4-chloro-9H-xanthen-9-one (2q)*<sup>3</sup>

The desired pure product was obtained in 35% yield (81 mg) as a white solid, mp 133-134°C. <sup>1</sup>H NMR (600 MHz, CDCl<sub>3</sub>) δ 8.32 (dd, *J* = 7.9, 1.2 Hz, 1H), 8.24 (dd, *J* = 8.0, 1.4 Hz, 1H), 7.79 – 7.74 (m, 2H), 7.60 (d, *J* = 8.4 Hz, 1H), 7.41 (t, *J* = 7.5 Hz, 1H), 7.31 (t, *J* = 7.8 Hz, 1H). <sup>13</sup>C NMR (151 MHz, CDCl<sub>3</sub>) δ 176.6, 155.8, 151.8, 135.2, 134.9, 126.7, 125.3, 124.5, 123.8, 123.2, 122.8, 121.4, 118.2.

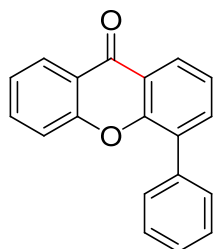

*4-phenyl-9H-xanthen-9-one (2r)*<sup>3</sup>

The desired pure product was obtained in 82% yield (223 mg) as a white solid, mp 137-138°C. <sup>1</sup>H NMR (600 MHz, CDCl<sub>3</sub>) δ 8.37 (m, 2H), 7.76 (d, *J* = 7.2 Hz, 1H), 7.68 (m, 3H), 7.53 (t, *J* = 7.6 Hz, 2H), 7.49 – 7.42 (m, 2H), 7.39 (m, 2H). <sup>13</sup>C NMR (151 MHz, CDCl<sub>3</sub>) δ 177.3, 156.0, 153.0, 136.4, 135.8, 134.7, 131.5, 129.7, 128.4, 127.9, 126.7, 126.1, 124.0, 123.8, 122.3, 121.5, 118.1.

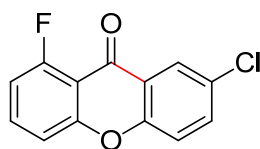

*7-chloro-1-fluoro-9H-xanthen-9-one (2s)*

The desired pure product was obtained in 62% yield (154 mg) as a white solid, mp 172-174°C. <sup>1</sup>H NMR (600 MHz, CDCl<sub>3</sub>) δ 8.23 (s, 1H), 7.69 – 7.62 (m, 2H), 7.41 (d, *J* = 8.8 Hz, 1H), 7.28 (d, *J* = 8.5 Hz, 1H), 7.06 – 7.01 (m, 1H). <sup>13</sup>C NMR (151 MHz, CDCl<sub>3</sub>) δ 174.1, 162.4, 160.6, 156.9, 153.7, 135.1,



135.1, 135.0, 130.1, 126.0, 123.1, 119.4, 113.9, 113.9, 112.1, 112.0, 111.3, 111.1. HRMS (ESI) exact mass calcd for  $C_{13}H_7ClFO_2$  [M+H]  $m/z$  249.0119, found 249.0128.

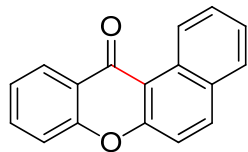

*12H-benzo[a]xanthen-12-one (2t)*<sup>3</sup>

The desired pure product was obtained in 70% yield (173 mg) as a white solid, mp 145-146°C. <sup>1</sup>H NMR (600 MHz, CDCl<sub>3</sub>) δ 10.09 (d,  $J$  = 8.6 Hz, 1H), 8.44 (d,  $J$  = 7.9 Hz, 1H), 8.11 (d,  $J$  = 9.0 Hz, 1H), 7.89 (d,  $J$  = 7.9 Hz, 1H), 7.78 (t,  $J$  = 7.7 Hz, 1H), 7.72 (t,  $J$  = 7.7 Hz, 1H), 7.59 (t,  $J$  = 7.4 Hz, 1H), 7.54 (m, 2H), 7.43 (t,  $J$  = 7.5 Hz, 1H). <sup>13</sup>C NMR (151 MHz, CDCl<sub>3</sub>) δ 178.4, 157.5, 154.6, 136.6, 133.8, 131.1, 130.1, 129.5, 128.3, 126.9, 126.6, 126.1, 124.2, 123.5, 118.0, 117.5, 114.5.

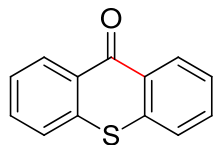

*9H-thioxanthen-9-one (2u)*<sup>5</sup>

The desired pure product was obtained in 52% yield (110 mg) as a white solid, mp 181-182°C. <sup>1</sup>H NMR (600 MHz, CDCl<sub>3</sub>) δ 8.61 (dd,  $J$  = 8.1, 0.7 Hz, 2H), 7.60 (d,  $J$  = 6.9 Hz, 2H), 7.56 (d,  $J$  = 7.8 Hz, 2H), 7.47 (t,  $J$  = 7.5 Hz, 2H). <sup>13</sup>C NMR (151 MHz, CDCl<sub>3</sub>) δ 179.9, 137.3, 132.2, 129.8, 129.2, 126.3, 126.0.

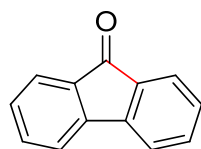

*9H-fluoren-9-one (2v)*<sup>2</sup>

The desired pure product was obtained in 78% yield (141 mg) as a yellow solid, mp 79-80°C.  $^1\text{H}$  NMR (600 MHz,  $\text{CDCl}_3$ )  $\delta$  7.65 (d,  $J = 7.3$  Hz, 2H), 7.51 (d,  $J = 7.3$  Hz, 2H), 7.47 (t,  $J = 7.4$  Hz, 2H), 7.28 (t,  $J = 7.3$  Hz, 2H).  $^{13}\text{C}$  NMR (151 MHz,  $\text{CDCl}_3$ )  $\delta$  193.8, 144.3, 134.6, 134.0, 129.0, 124.2, 120.3.

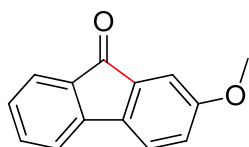

*2-methoxy-9H-fluoren-9-one (2w)*<sup>2</sup>

The desired pure product was obtained in 56% yield (118 mg) as a yellow solid, mp 121-123°C.  $^1\text{H}$  NMR (600 MHz,  $\text{CDCl}_3$ )  $\delta$  7.59 (d,  $J = 7.3$  Hz, 1H), 7.43 (t,  $J = 7.4$  Hz, 1H), 7.39 (d,  $J = 8.2$  Hz, 2H), 7.21 – 7.17 (m, 2H), 6.97 (dd,  $J = 8.1, 2.4$  Hz, 1H), 3.85 (s, 3H).  $^{13}\text{C}$  NMR (151 MHz,  $\text{CDCl}_3$ )  $\delta$  193.8, 160.8, 144.9, 137.0, 135.9, 134.8, 134.3, 127.9, 124.3, 121.3, 120.3, 119.5, 109.4, 55.7.

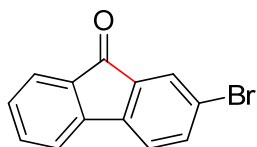

*2-bromo-9H-fluoren-9-one (2x)*<sup>2</sup>

The desired pure product was obtained in 51% yield (132 mg) as a yellow solid, mp 132-133°C.  $^1\text{H}$  NMR (600 MHz,  $\text{CDCl}_3$ )  $\delta$  7.74 (d,  $J = 1.6$  Hz, 1H), 7.64 (d,  $J = 7.3$  Hz, 1H), 7.58 (dd,  $J = 7.9, 1.7$  Hz, 1H), 7.50 – 7.47 (m, 2H), 7.37 (d,  $J = 7.9$  Hz, 1H), 7.31 (m, 1H).  $^{13}\text{C}$  NMR (151 MHz,  $\text{CDCl}_3$ )  $\delta$  192.4, 143.7, 143.0, 137.1, 135.8, 135.0, 133.7, 129.4, 127.5, 124.6, 122.9, 121.7, 120.4.

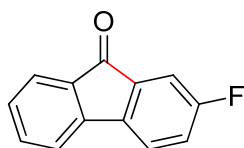

*2-fluoro-9H-fluoren-9-one (2y)*<sup>2</sup>

The desired pure product was obtained in 42% yield (83 mg) as a yellow solid, mp 115-116°C. <sup>1</sup>H NMR (600 MHz, CDCl<sub>3</sub>) δ 7.63 (d, *J* = 7.4 Hz, 1H), 7.48 (d, *J* = 7.4 Hz, 1H), 7.46 (s, 2H), 7.44 (d, *J* = 4.3 Hz, 1H), 7.31 (dd, *J* = 7.3, 2.4 Hz, 1H), 7.14 (td, *J* = 8.6, 2.4 Hz, 1H). <sup>13</sup>C NMR (151 MHz, CDCl<sub>3</sub>) δ 192.4, 164.3, 162.7, 143.9, 140.1, 140.1, 136.3, 136.3, 135.0, 134.3, 134.3, 128.7, 124.6, 121.6, 121.5, 120.9, 120.7, 120.1, 120.1, 112.0, 111.8.

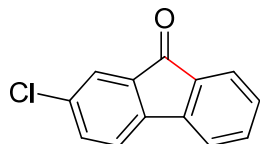

2-chloro-9H-fluoren-9-one (2z)<sup>2</sup>

The desired pure product was obtained in 48% yield (103 mg) as a yellow solid, mp 125-126°C. <sup>1</sup>H NMR (600 MHz, CDCl<sub>3</sub>) δ 7.65 (d, *J* = 7.3 Hz, 1H), 7.60 (s, 1H), 7.50 (m, 2H), 7.44 (s, 2H), 7.33 – 7.28 (m, 1H). <sup>13</sup>C NMR (151 MHz, CDCl<sub>3</sub>) δ 192.4, 143.6, 142.5, 135.6, 135.1, 135.0, 134.1, 133.9, 129.3, 121.3, 120.4.

#### References:

1. Wang, P.; Rao, H.-H.; Hua, R.-M.; Li, C.-J. *Org. Lett.* **2012**, *14*, 902.
2. Wertz, S.; Leifert, D.; Studer, A. *Org. Lett.* **2013**, *15*, 928.
3. Rao, H.-H.; Ma, X.-Y.; Liu, Q.-Z.; Li, Z.-F.; Cao, S.-L.; Li, C.-J. *Adv. Synth. Catal.* **2013**, *355*, 2191.
4. Mao, M.; Wu, Q.-Q.; Ren, M.-G.; Song, Q.-H. *Org. Biomol. Chem.* **2011**, *9*, 3165.
5. Venkanna, A, Goud P. V. K.; Prasad P. V.; Shanker M.; Rao P. V. *ChemistrySelect* **2016**, *1*, 2271.

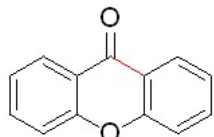

2a

8.35  
8.35  
8.33  
8.33  
7.74  
7.74  
7.72  
7.71  
7.70  
7.50  
7.48  
7.40  
7.40  
7.38  
7.36  
7.36

12

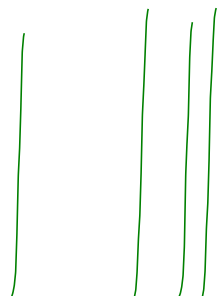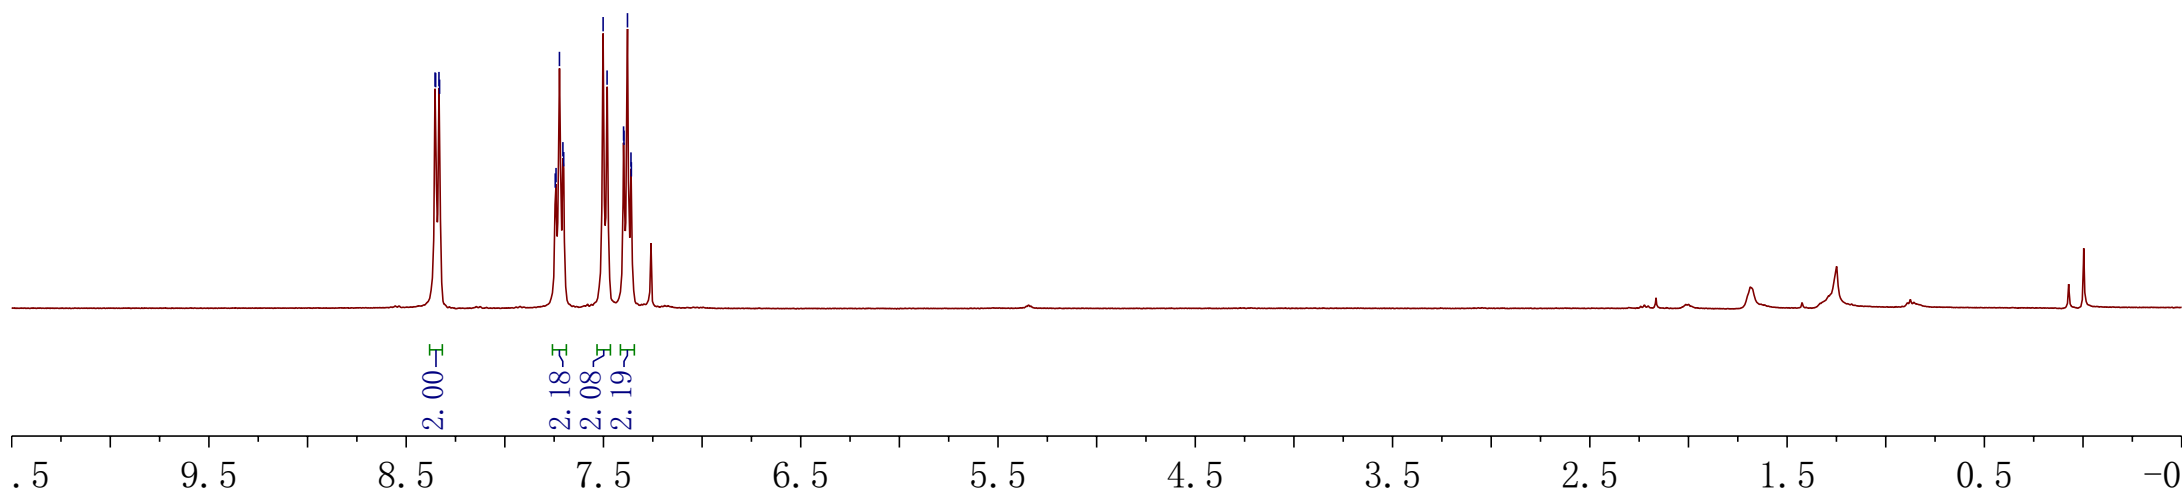

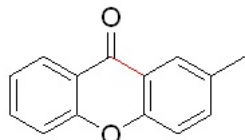

2b

8.34  
8.32  
8.11  
7.71  
7.70  
7.69  
7.52  
7.51  
7.47  
7.46  
7.38  
7.37  
7.35  
7.34

13

2.46

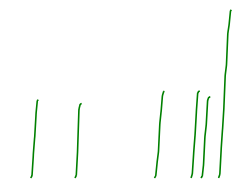

0.90  
0.86  
1.00  
1.01  
0.94  
1.94

3.33

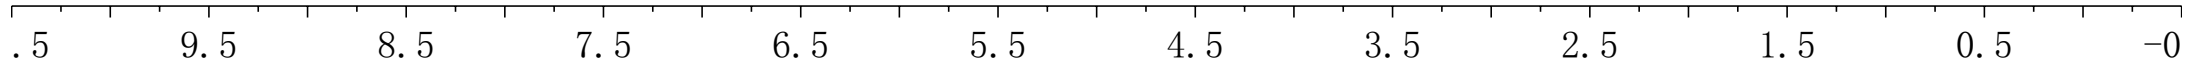

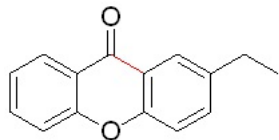

2c

8.35  
8.33  
8.15  
7.72  
7.72  
7.70  
7.69  
7.69  
7.57  
7.55  
7.48  
7.47  
7.42  
7.42  
7.40  
7.40  
7.37  
7.36  
7.35  
7.35

14

2.79  
2.78  
2.77  
2.75

1.32  
1.30  
1.30  
1.29

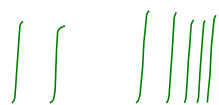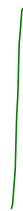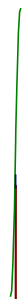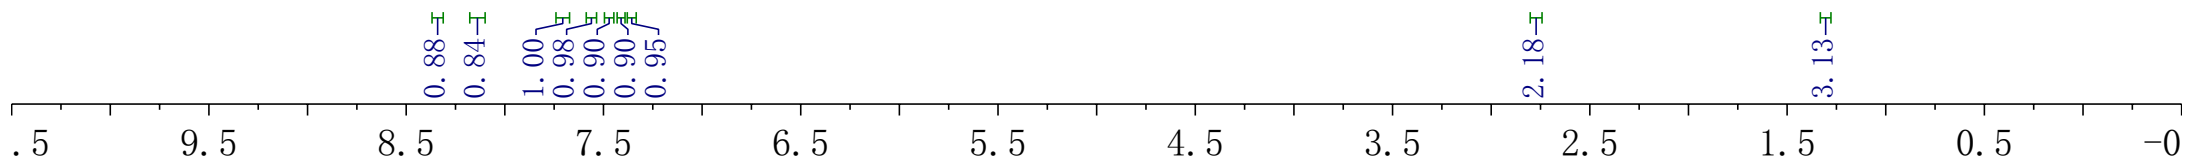

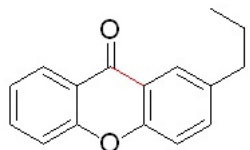

2d

8.35  
8.33  
8.12  
7.71  
7.70  
7.70  
7.69  
7.54  
7.53  
7.48  
7.46  
7.41  
7.40  
7.37  
7.36  
7.34

15

2.72  
2.71  
2.69  
1.74  
1.72  
1.71  
1.70  
1.69  
1.67  
0.97  
0.96  
0.95

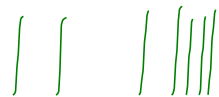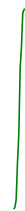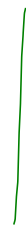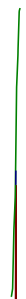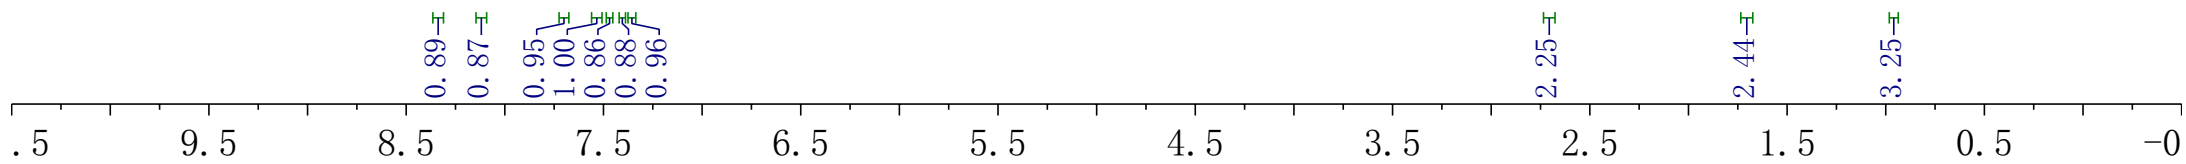

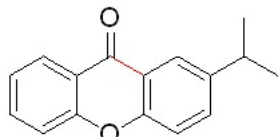

2e

8.36  
8.36  
8.35  
8.35  
8.19  
8.19  
7.73  
7.73  
7.72  
7.71  
7.70  
7.63  
7.62  
7.61  
7.61  
7.50  
7.48  
7.45  
7.43  
7.39  
7.37  
7.36

16

3.08  
3.07  
3.06  
3.05  
3.04

1.33  
1.32

//

///

/

0.80

0.81

0.93

0.97

0.85

0.86

1.00

1.03

6.21

.5 9.5 8.5 7.5 6.5 5.5 4.5 3.5 2.5 1.5 0.5 -0



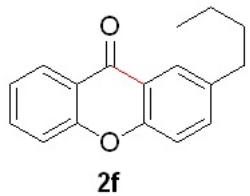

8.35  
8.35  
8.34  
8.33  
8.13  
8.12  
7.72  
7.71  
7.70  
7.69  
7.69  
7.55  
7.55  
7.54  
7.53  
7.48  
7.47  
7.41  
7.40  
7.37  
7.36  
7.35

17

2.74  
2.73  
2.72  
1.69  
1.67  
1.66  
1.65  
1.63  
1.41  
1.39  
1.38  
1.37  
1.36  
1.34  
0.95  
0.94  
0.93

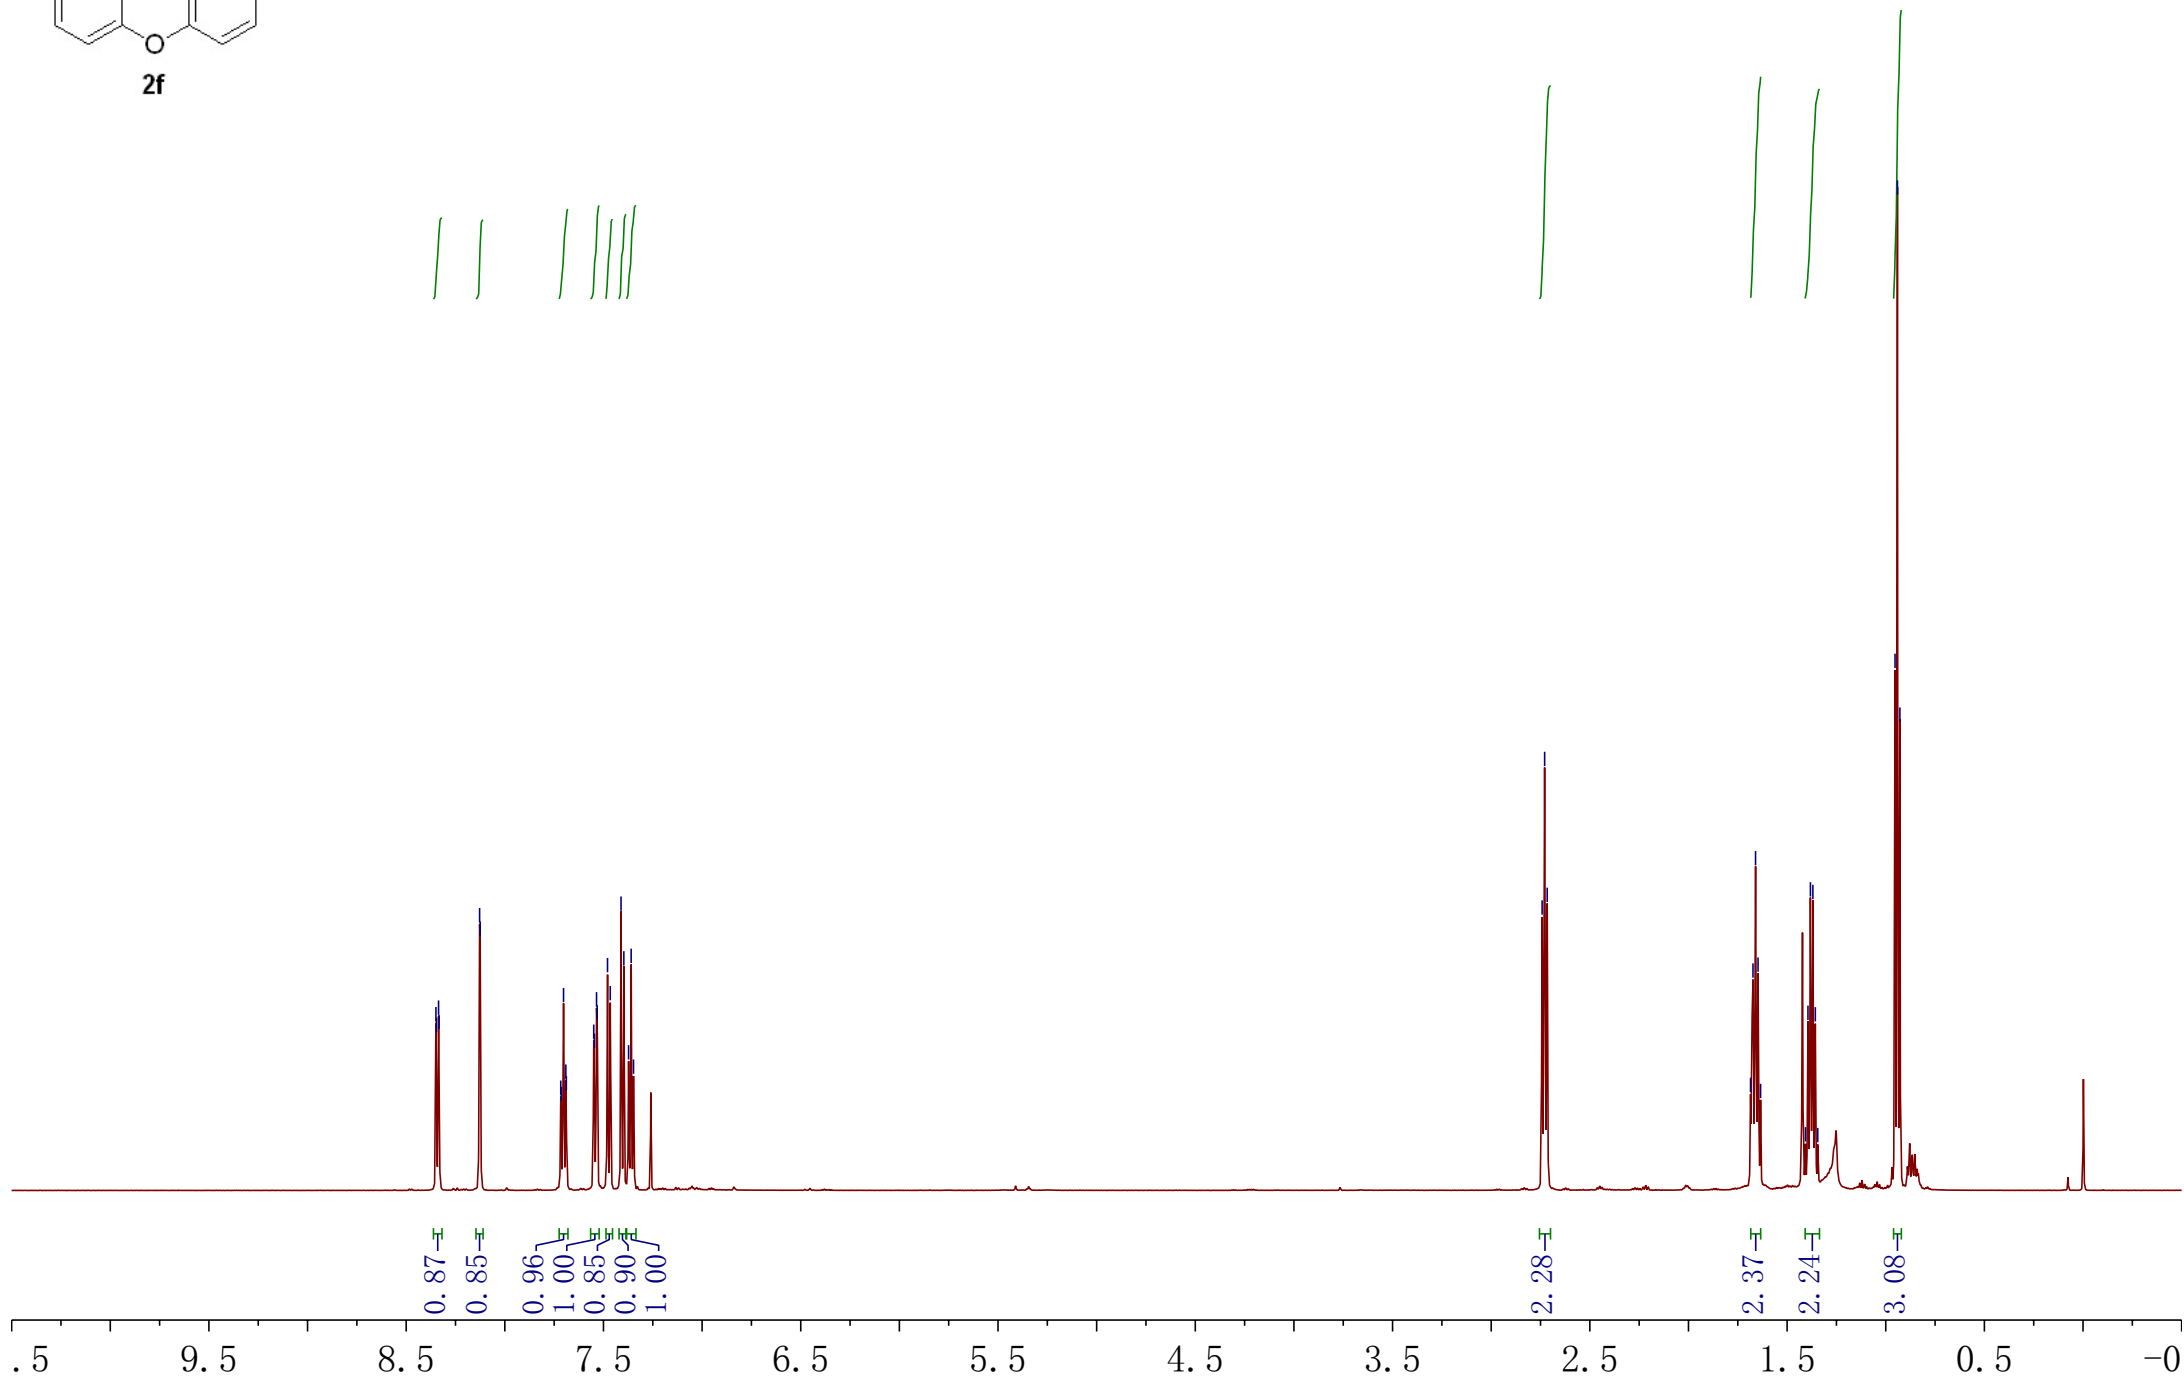

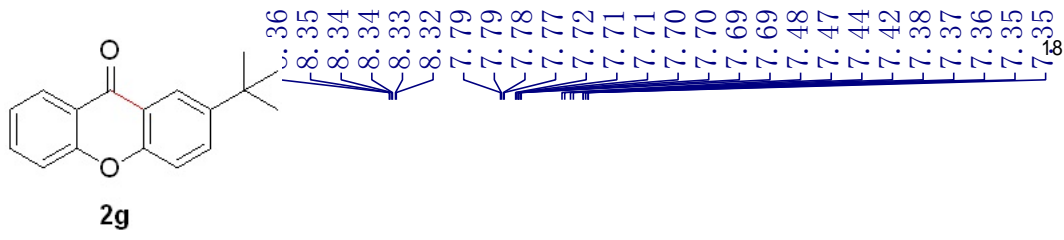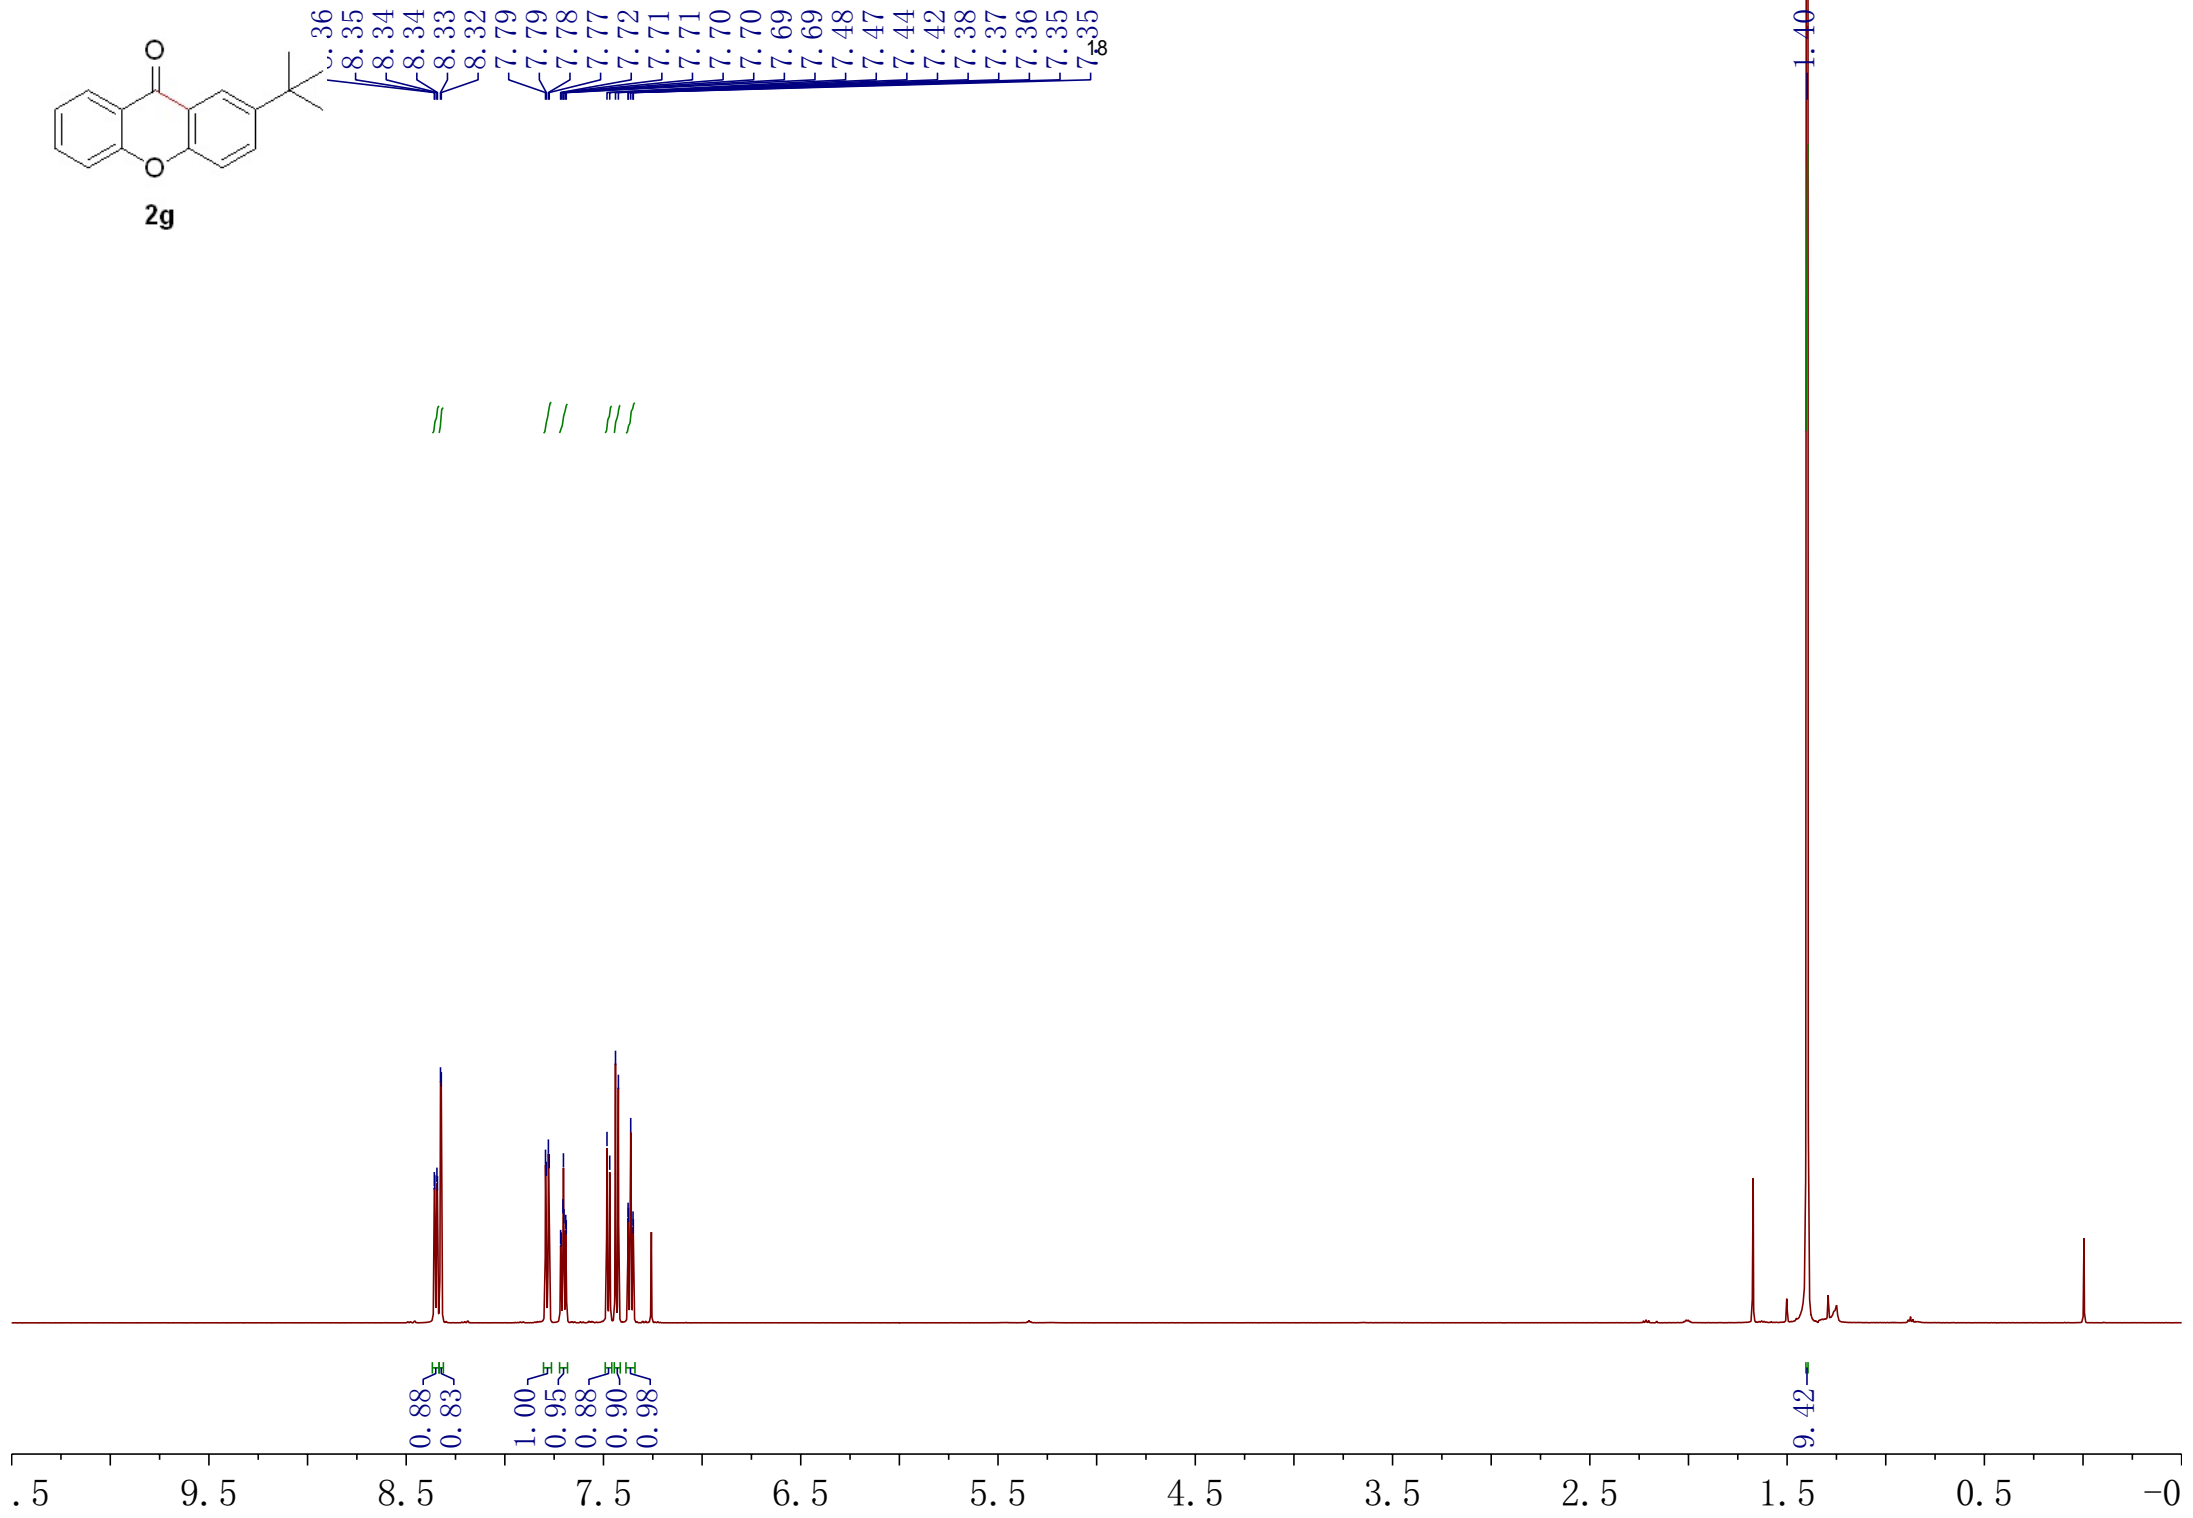

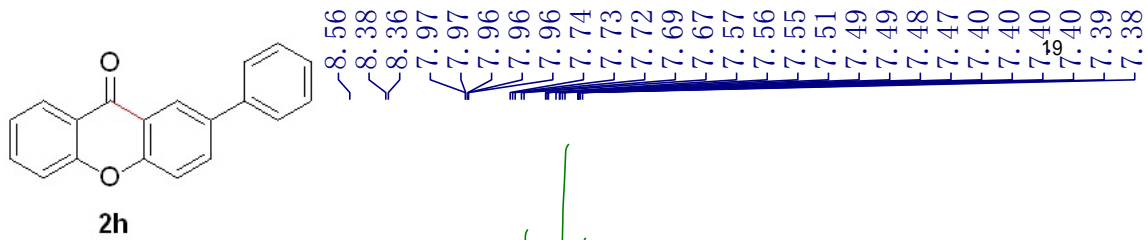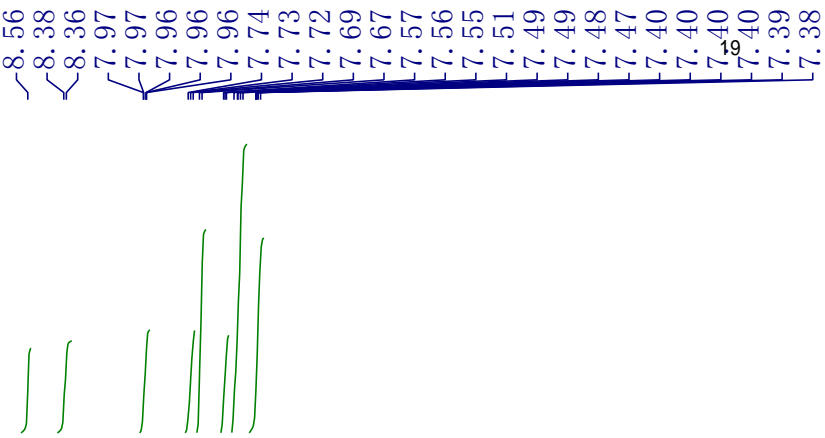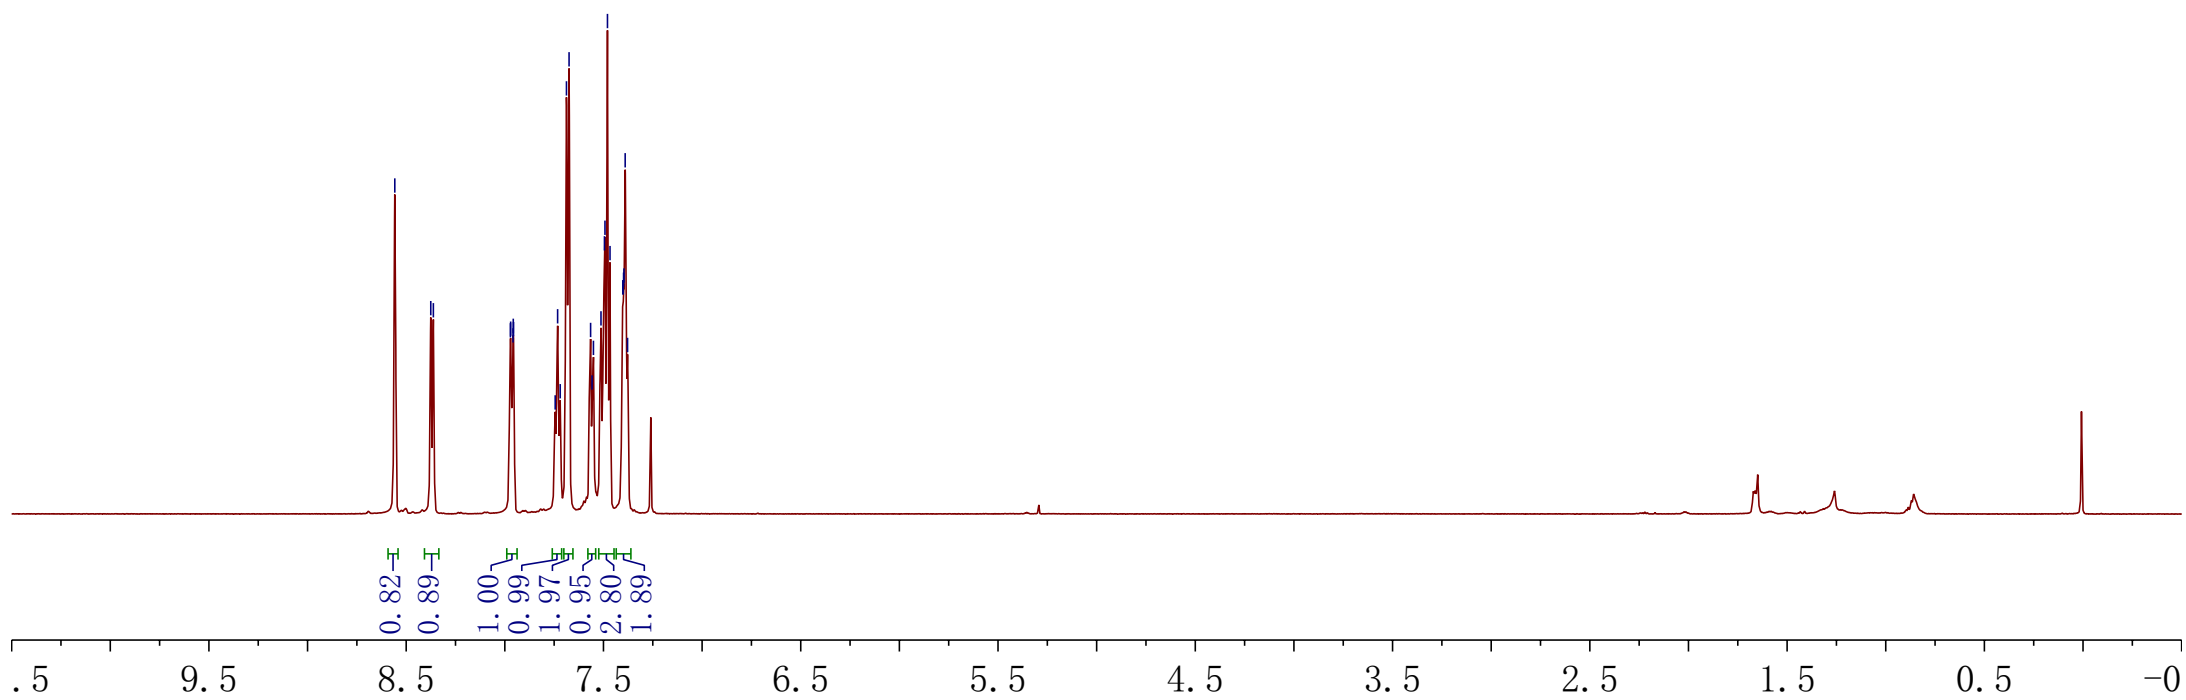

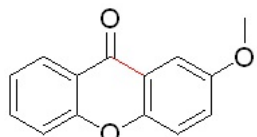

2i

8.36  
8.36  
8.35  
8.34  
7.73  
7.73  
7.71  
7.71  
7.71  
7.70  
7.50  
7.48  
7.45  
7.44  
7.39  
7.38  
7.36  
7.34  
7.34  
7.33  
7.32

20

3.92

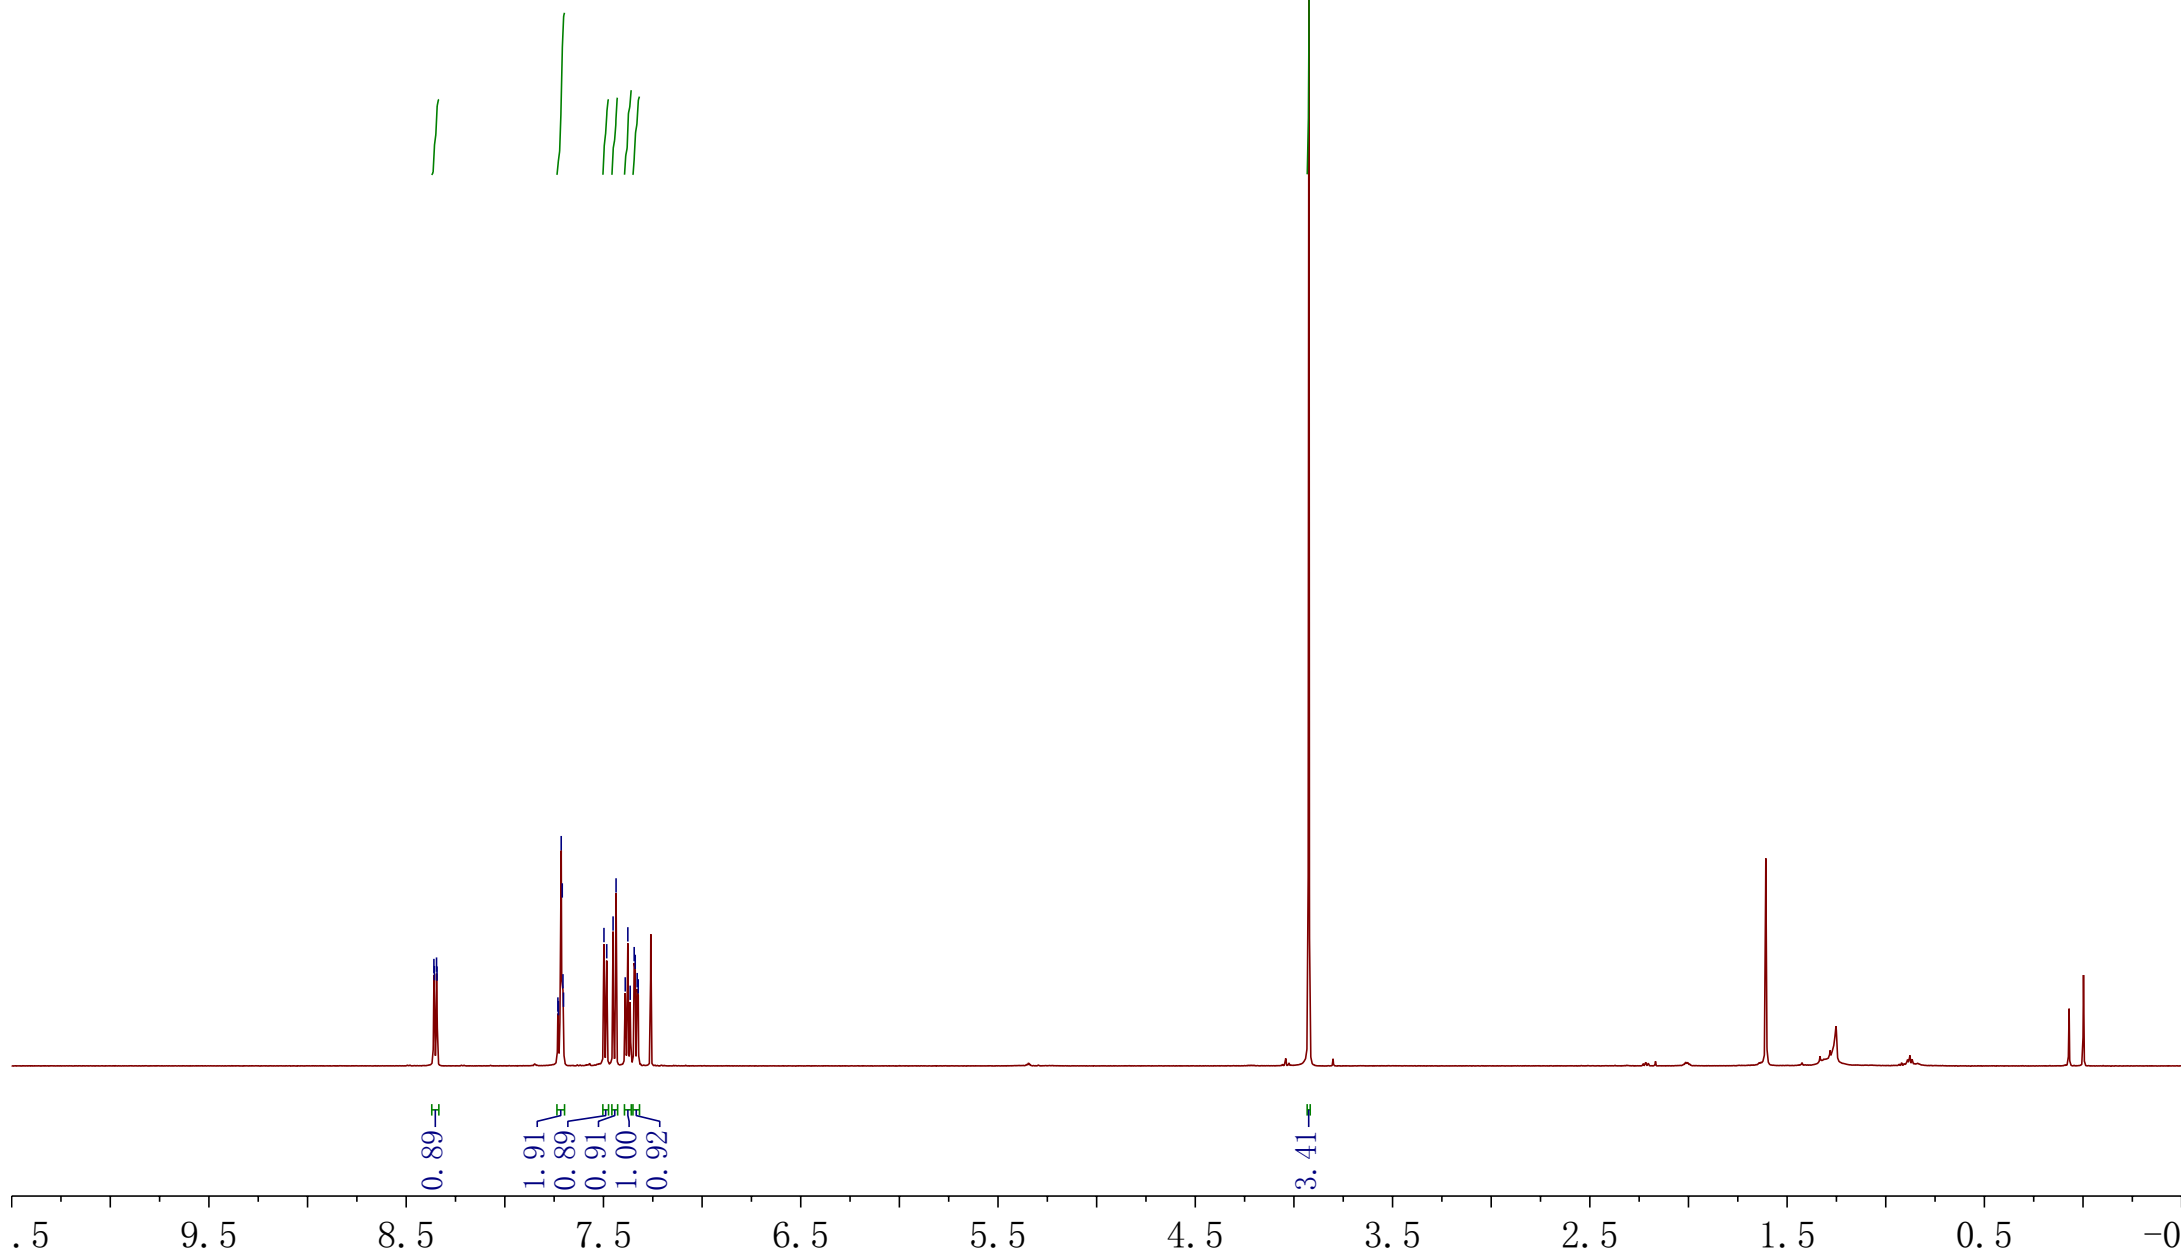

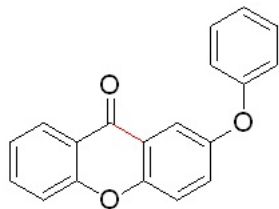

2j

8.33  
8.31  
7.88  
7.87  
7.74  
7.73  
7.72  
7.52  
7.51  
7.49  
7.47  
7.47  
7.47  
7.46  
7.45  
7.45  
7.39  
7.38  
7.37  
7.36  
7.17  
7.15  
7.14  
7.06  
7.04

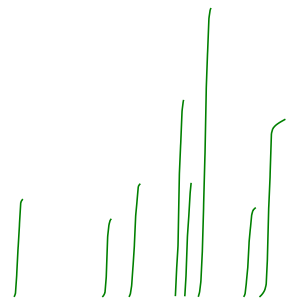

1.00  
0.80  
1.16  
2.01  
1.17  
2.95  
0.91  
1.82

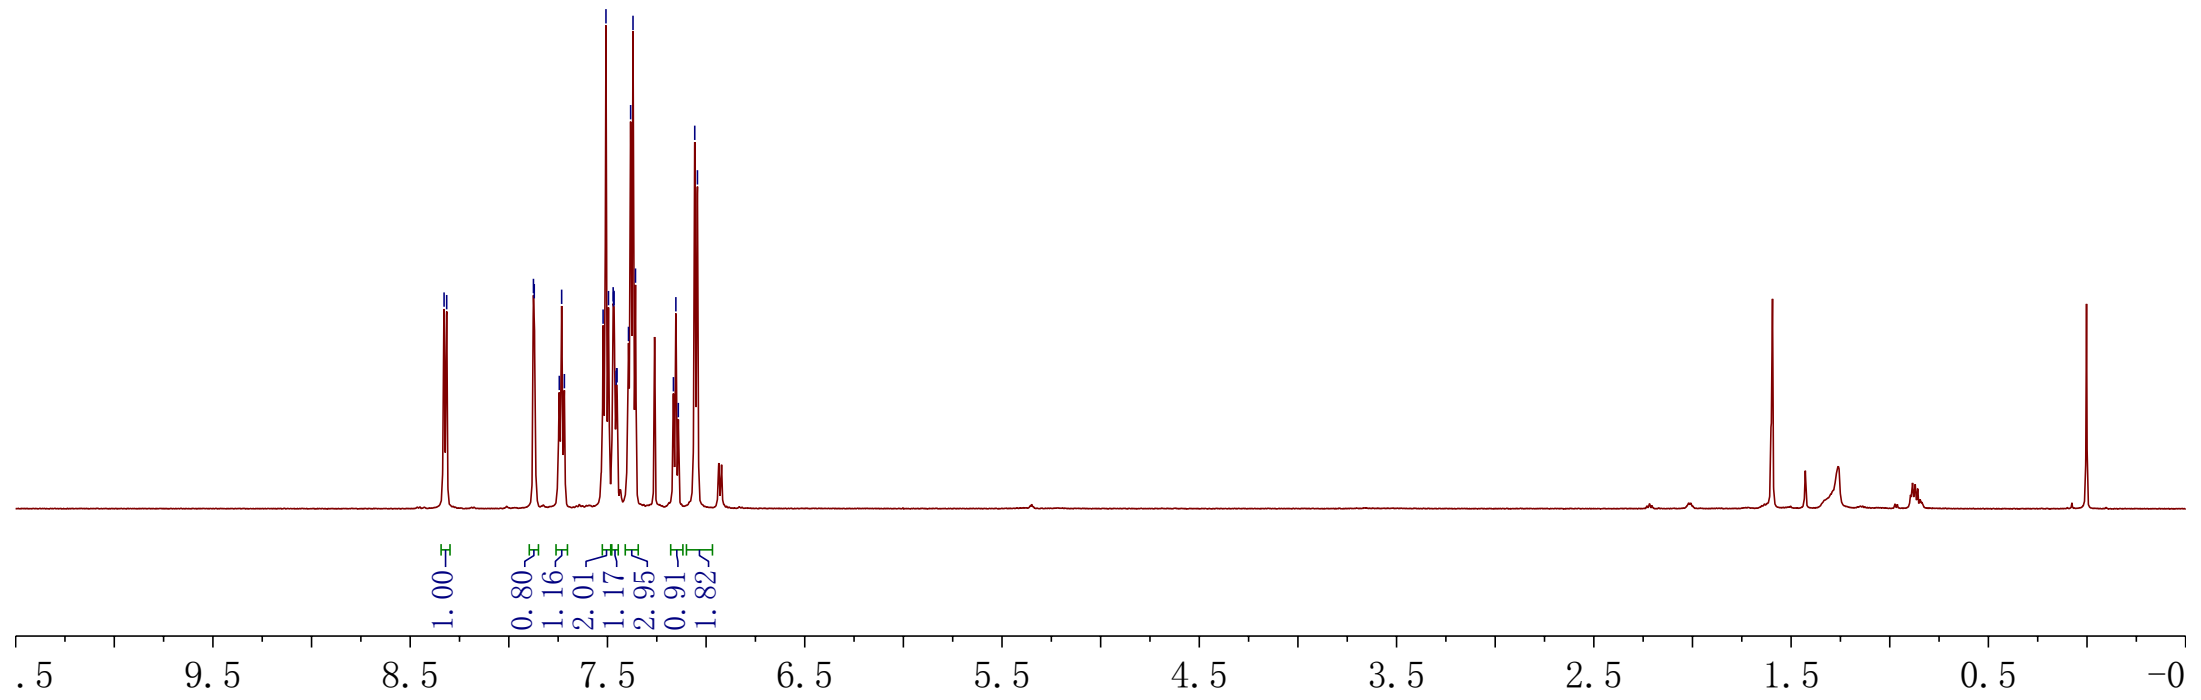

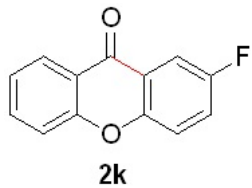

8.32  
8.31  
8.30  
8.30  
7.96  
7.96  
7.95  
7.94  
7.74  
7.74  
7.73  
7.73  
7.73  
7.72  
7.71  
7.50  
7.49  
7.48  
7.47  
7.47  
7.45  
7.45  
7.44  
7.43  
7.42  
7.42  
7.40  
7.39  
7.38  
7.37  
7.37

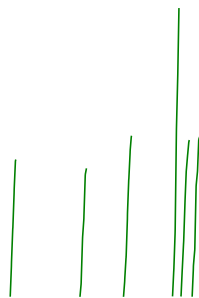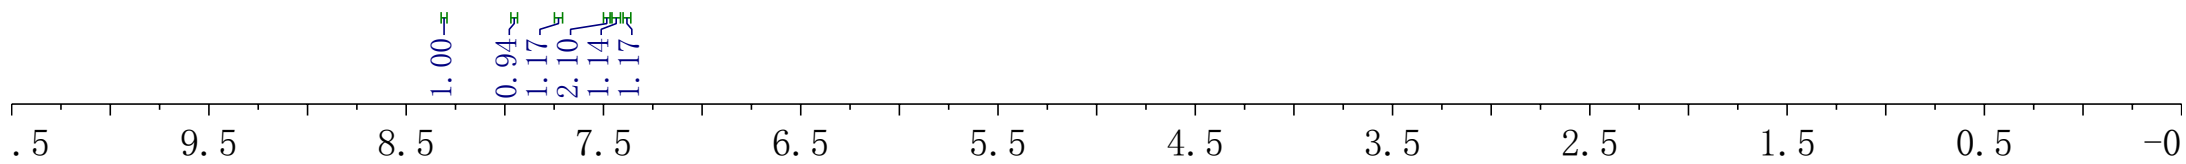

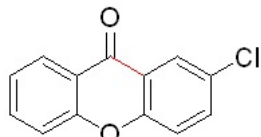

21

8.32  
8.31  
8.30  
8.30  
8.27  
8.27  
7.75  
7.74  
7.73  
7.73  
7.73  
7.72  
7.72  
7.65  
7.65  
7.64  
7.63  
7.48  
7.47  
7.45  
7.43  
7.40  
7.40  
7.39  
7.37  
7.37

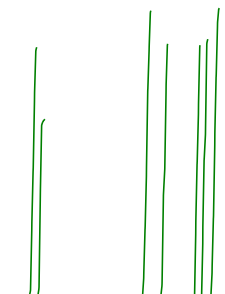

1.00  
0.71

1.15  
1.01  
1.01  
1.03  
1.16

9.5  
8.5  
7.5  
6.5  
5.5  
4.5  
3.5  
2.5  
1.5  
0.5  
-0

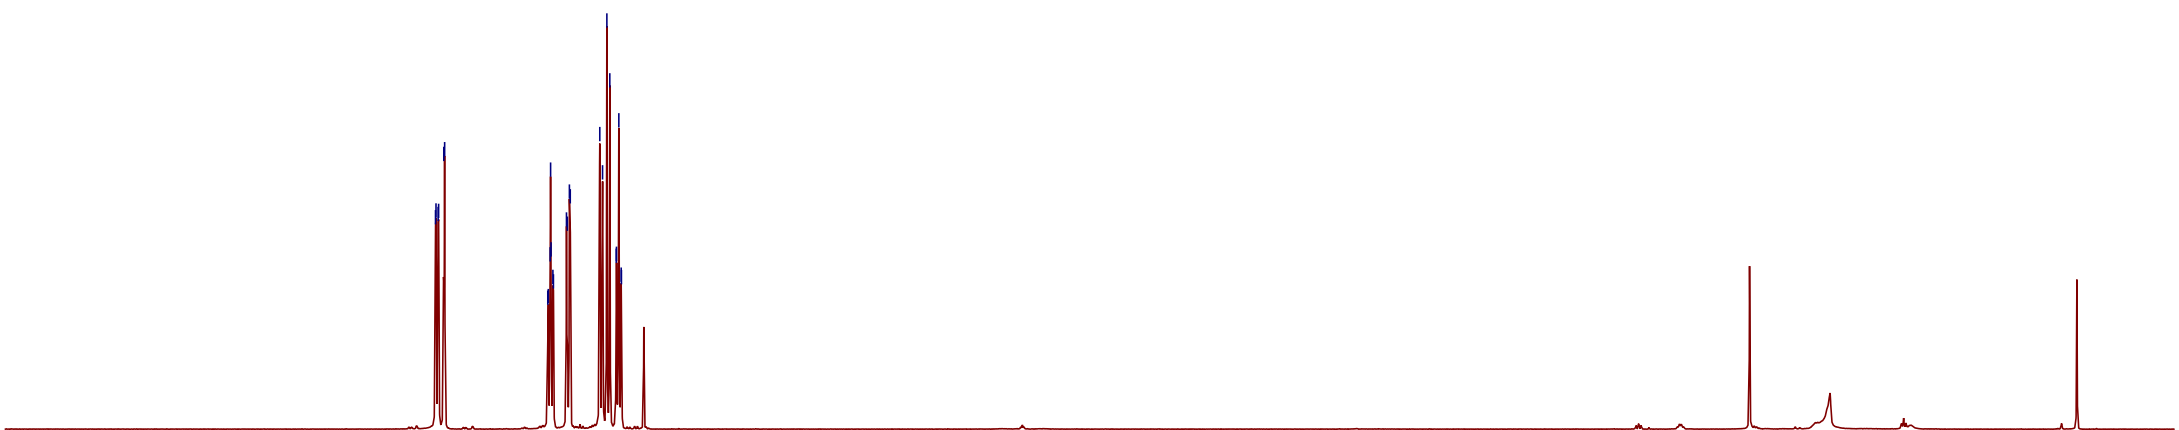

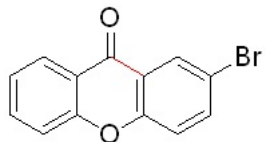

2m

8.43  
8.43  
8.31  
8.30  
7.79  
7.79  
7.78  
7.77  
7.77  
7.77  
7.75  
7.73  
7.72  
7.48  
7.47  
7.40  
7.39  
7.37

24

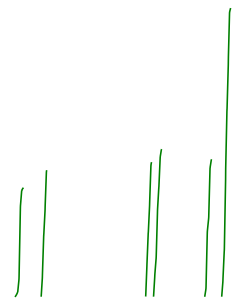

0.86  
1.00  
1.06  
1.17  
1.09  
2.28

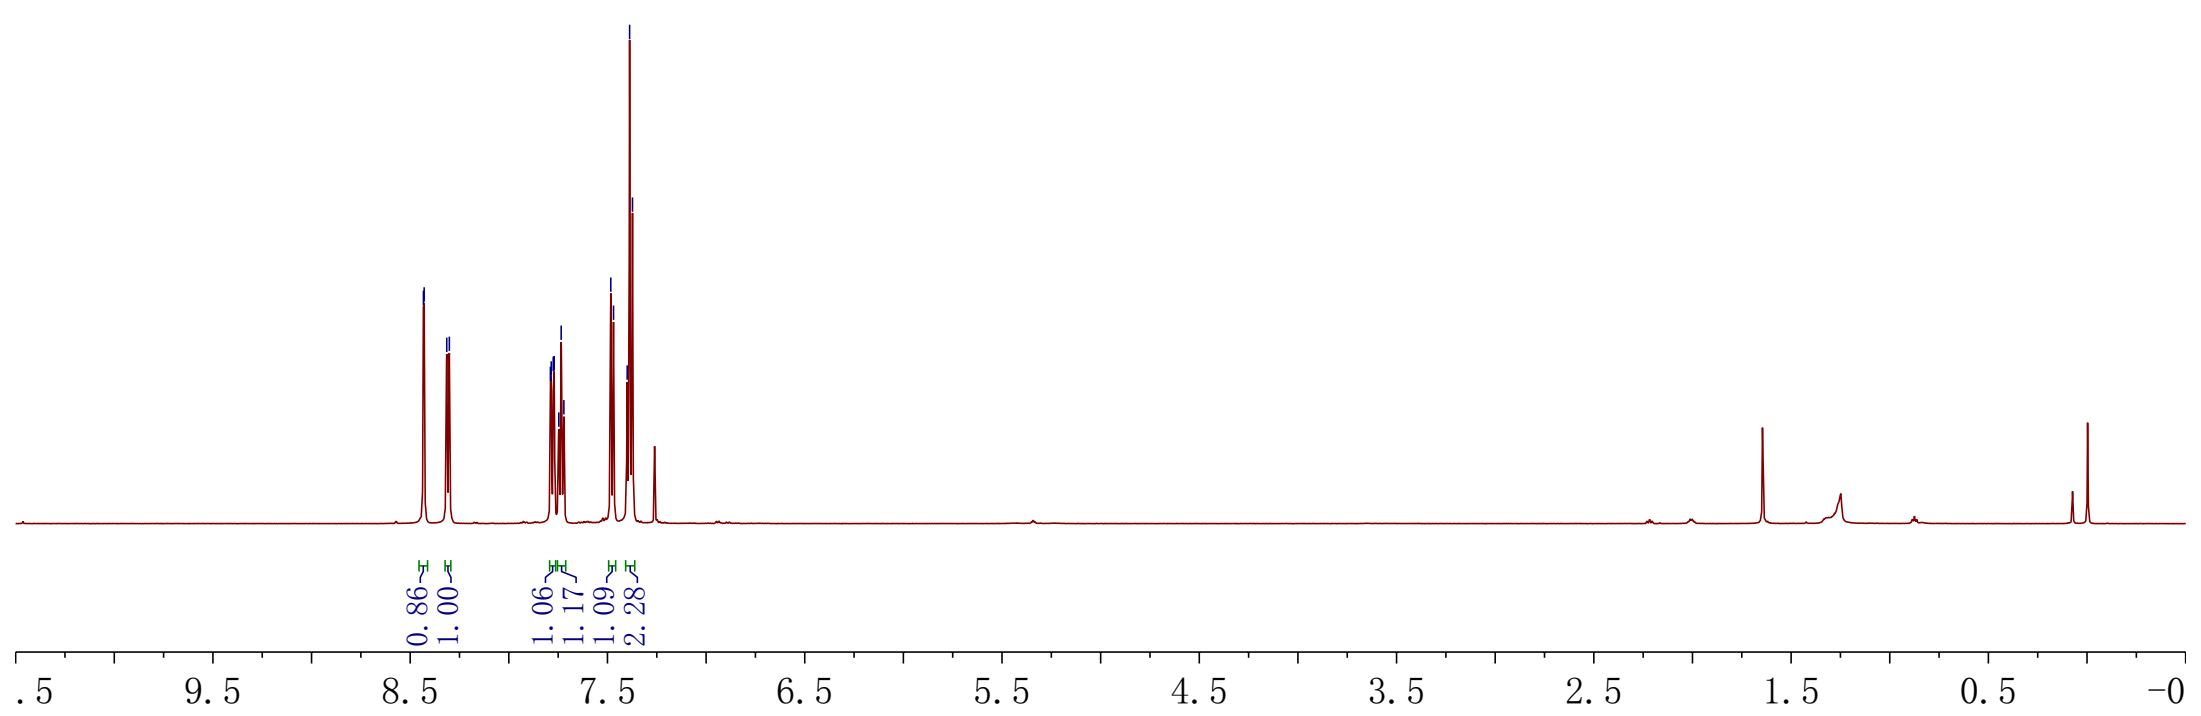



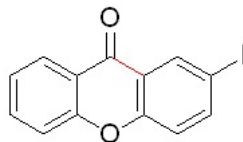

2n

8.62  
8.62  
8.31  
8.31  
8.30  
8.30  
7.96  
7.95  
7.94  
7.94  
7.74  
7.74  
7.73  
7.73  
7.73  
7.72  
7.71  
7.48  
7.46  
7.39  
7.39  
7.38  
7.37  
7.37  
7.25  
7.24<sup>25</sup>

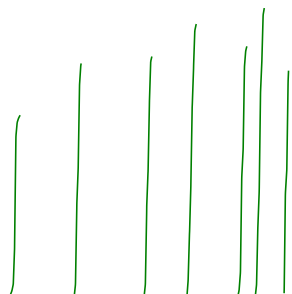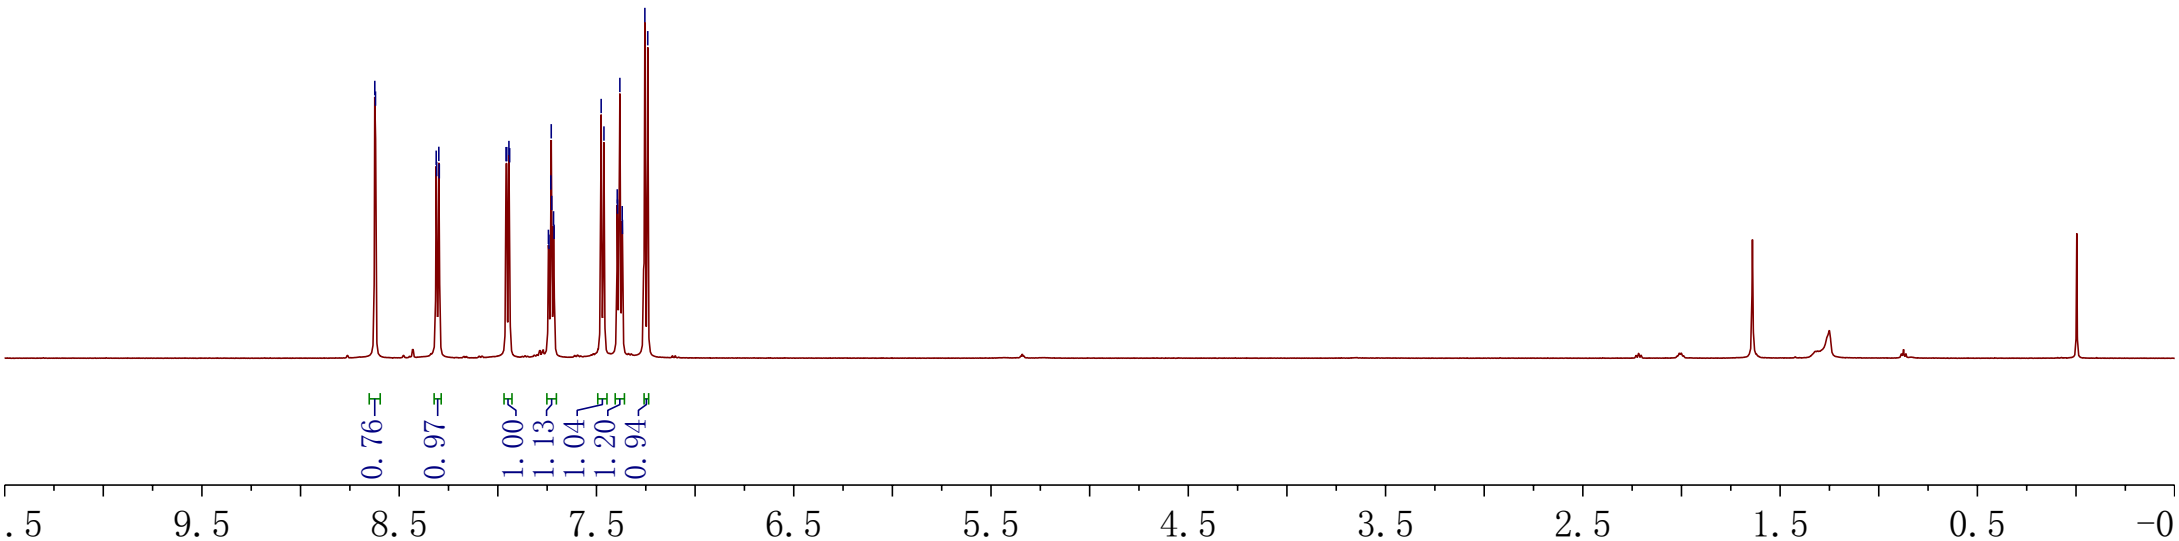

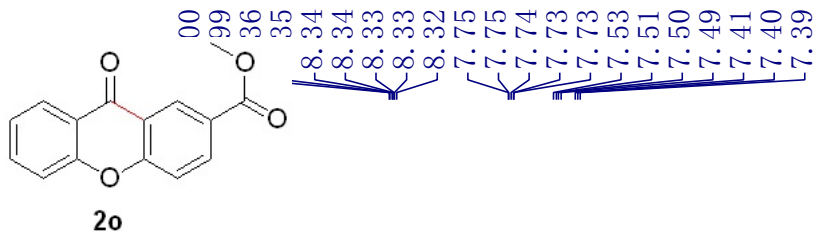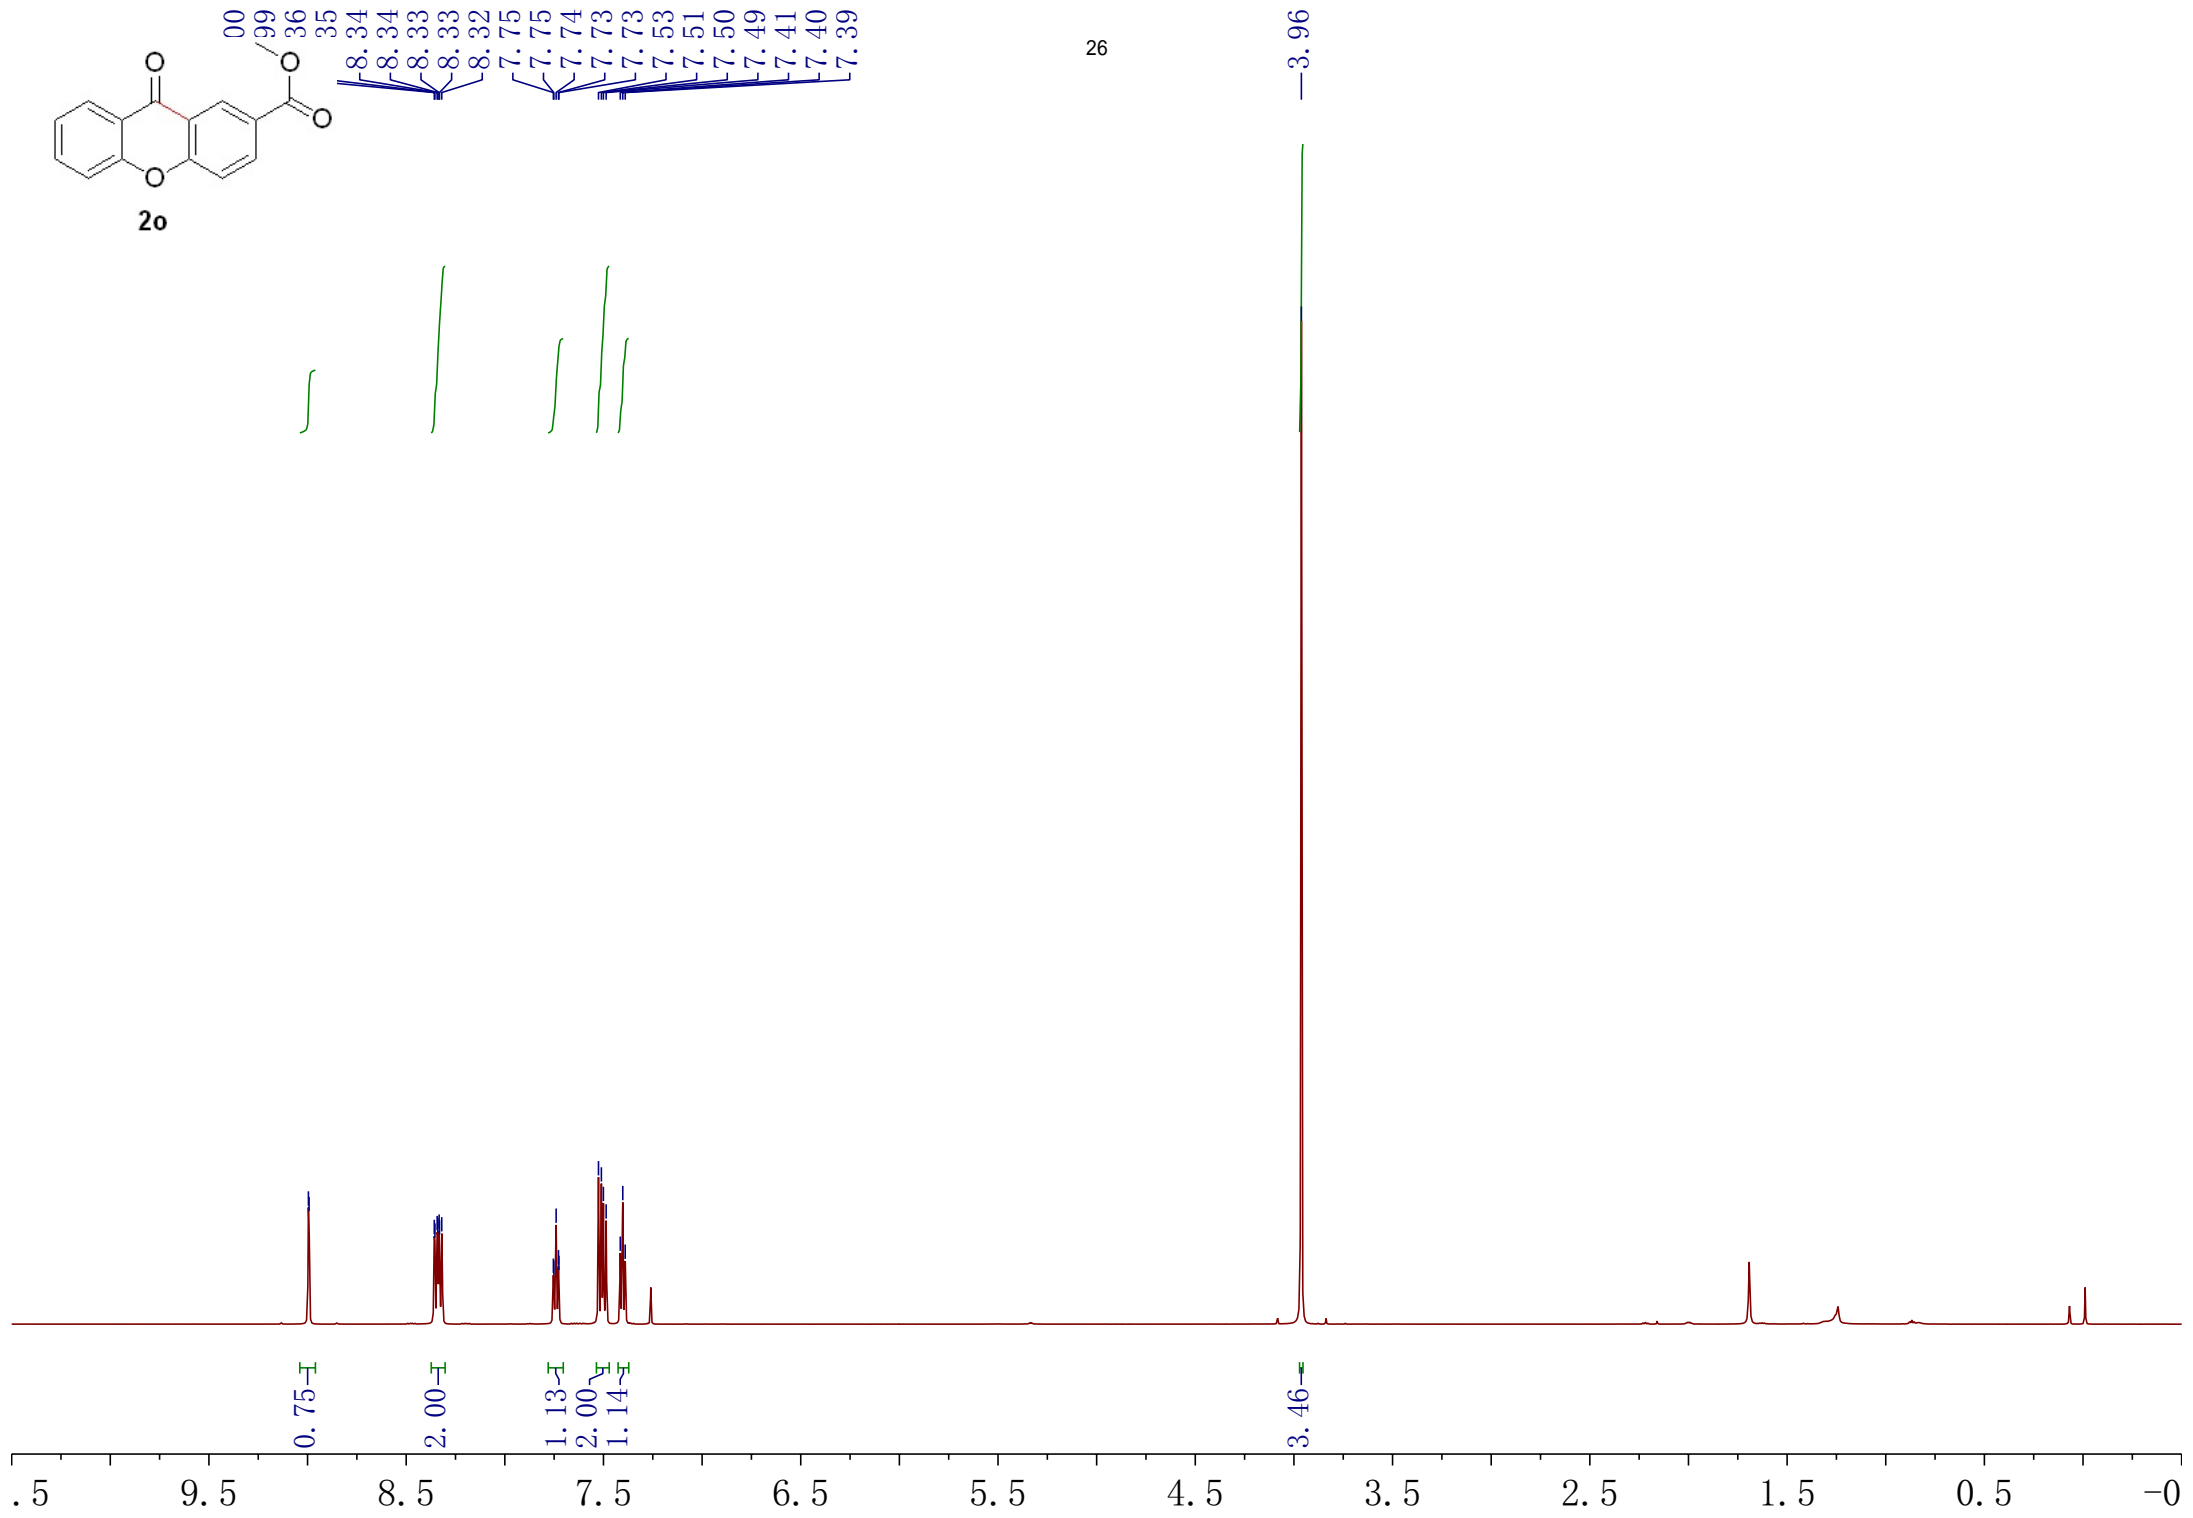

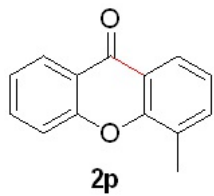

8.35  
8.33  
8.19  
8.18  
7.74  
7.73  
7.72  
7.71  
7.71  
7.57  
7.56  
7.56  
7.54  
7.52  
7.39  
7.38  
7.36  
7.28  
7.27  
7.26  
7.25

27

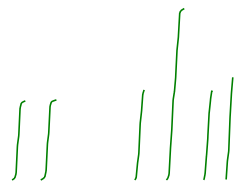

0.88  
0.89  
1.00  
1.90  
0.99  
1.14

2.56  
3.21

9.5 8.5 7.5 6.5 5.5 4.5 3.5 2.5 1.5 0.5 -0

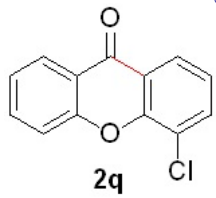

8.32  
8.32  
8.31  
8.31  
8.25  
8.25  
8.24  
8.23  
7.79  
7.78  
7.77  
7.77  
7.76  
7.75  
7.74  
7.60  
7.59  
7.42  
7.41  
7.40  
7.32  
7.31  
7.29

28

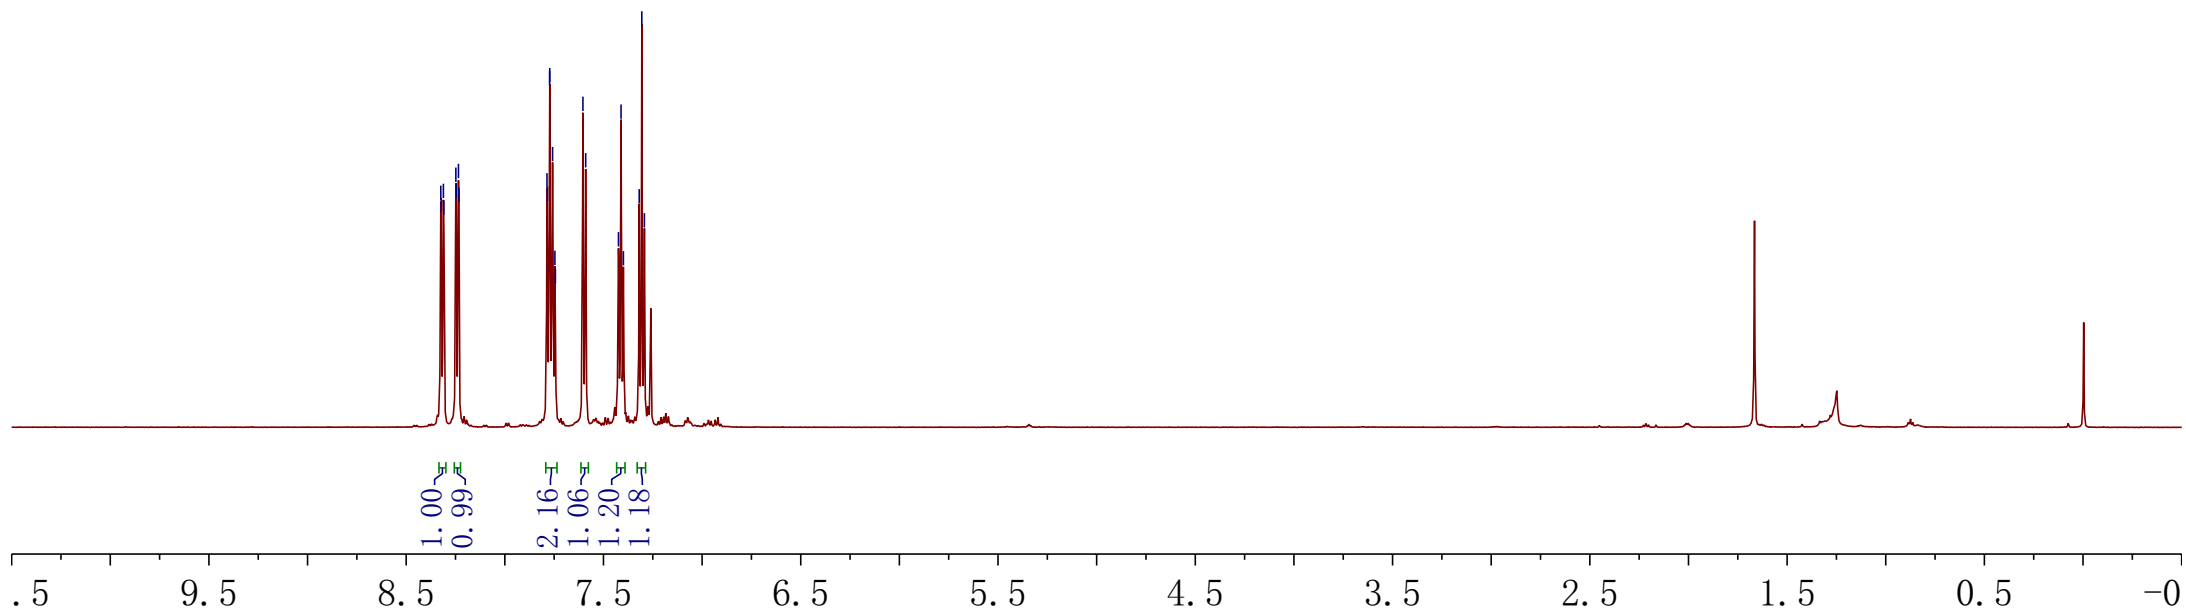

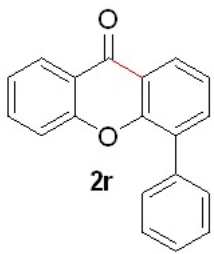

8.38  
8.37  
8.36  
8.35  
7.77  
7.76  
7.70  
7.69  
7.67  
7.66  
7.54  
7.53  
7.52  
7.48  
7.47  
7.45  
7.44  
7.41  
7.39  
7.38  
7.37

29

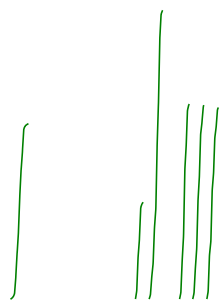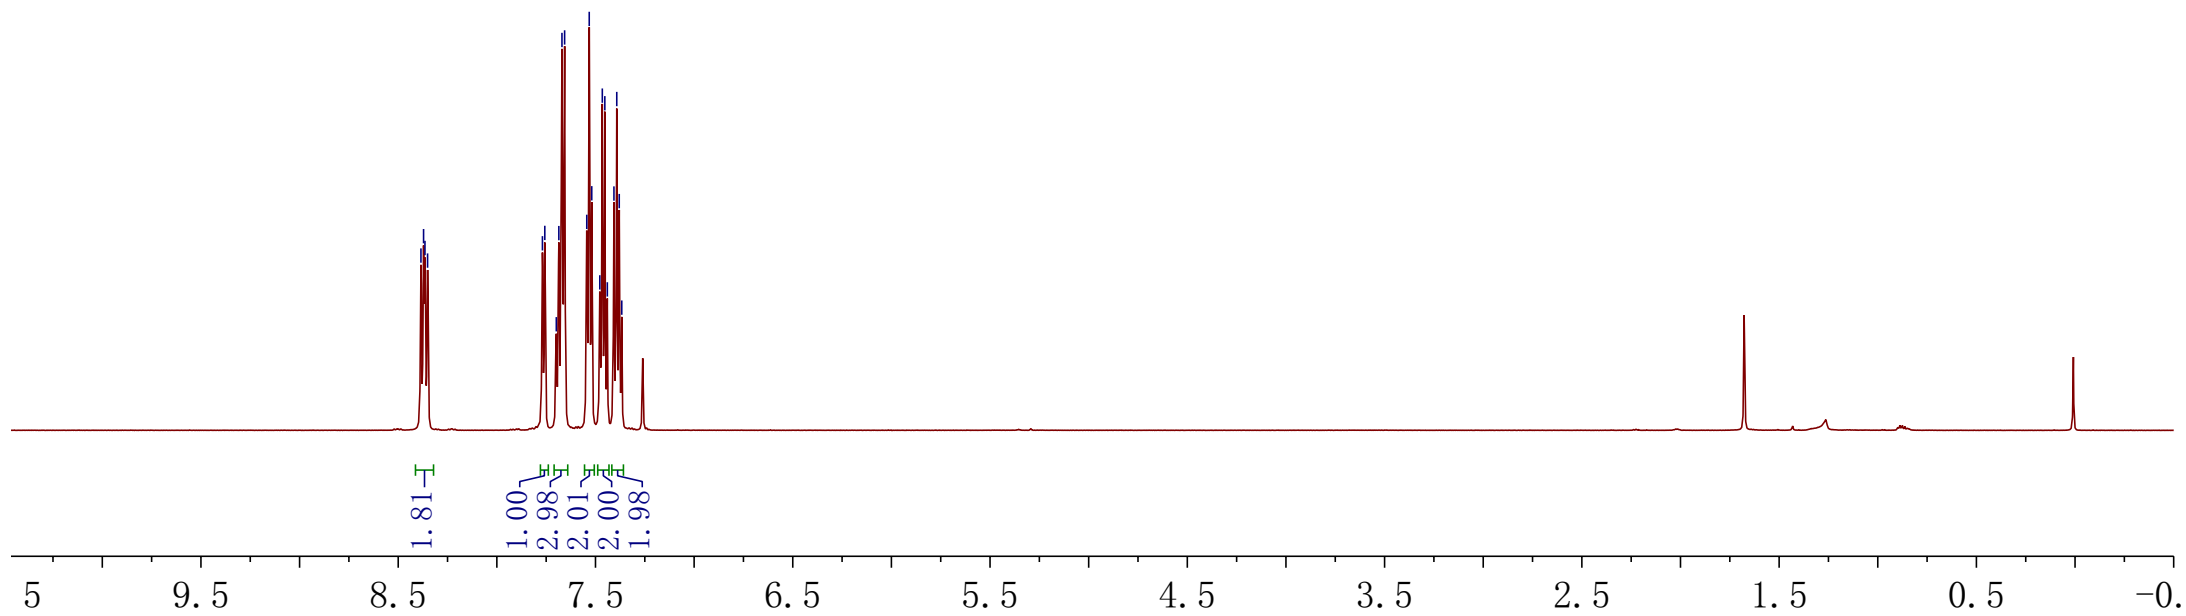

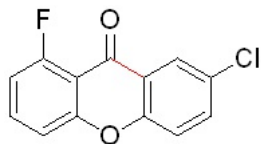

2s

8.23  
7.67  
7.66  
7.65  
7.63  
7.41  
7.40  
7.29  
7.28  
7.05  
7.04  
7.02

30

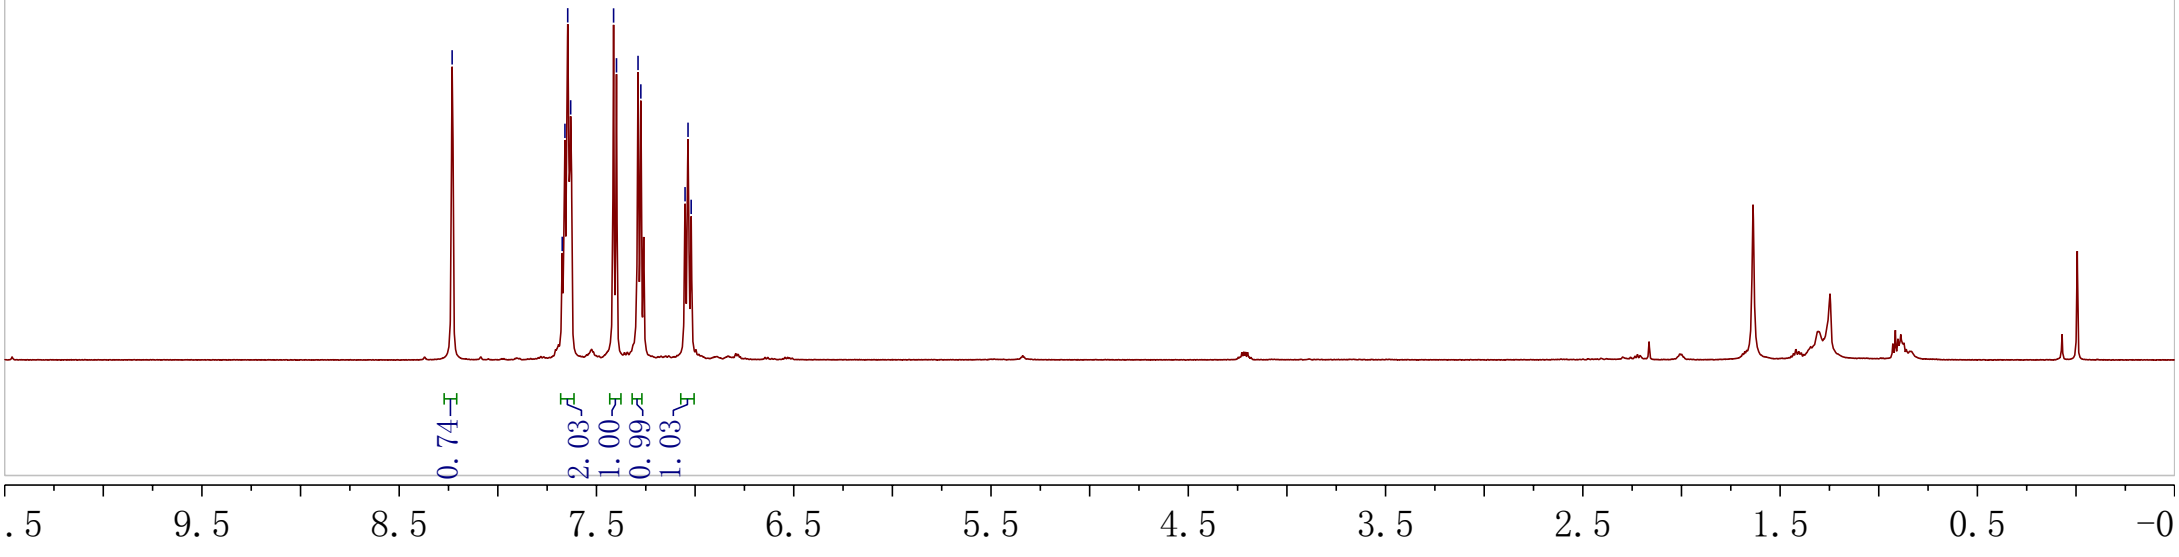

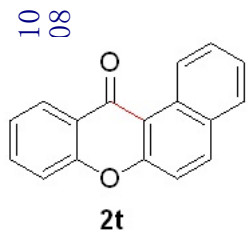

8.44  
8.43  
8.12  
8.10  
7.89  
7.88  
7.79  
7.78  
7.77  
7.73  
7.72  
7.70  
7.60  
7.59  
7.58  
7.55  
7.54  
7.53  
7.53  
7.45  
7.43  
7.42

31

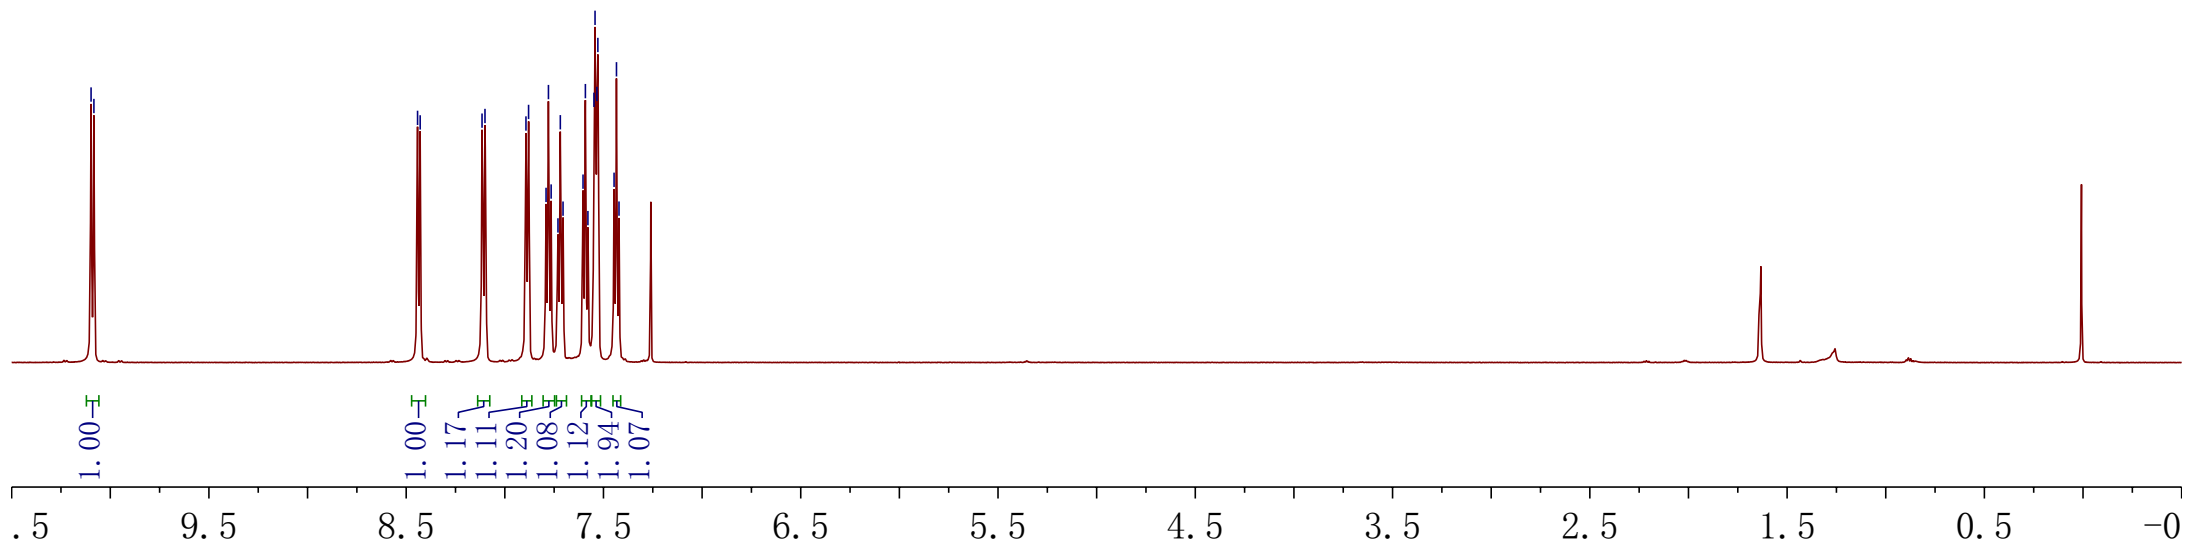

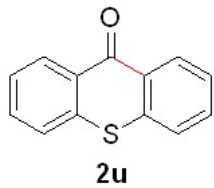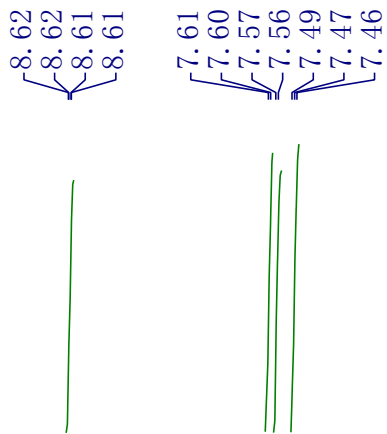

32

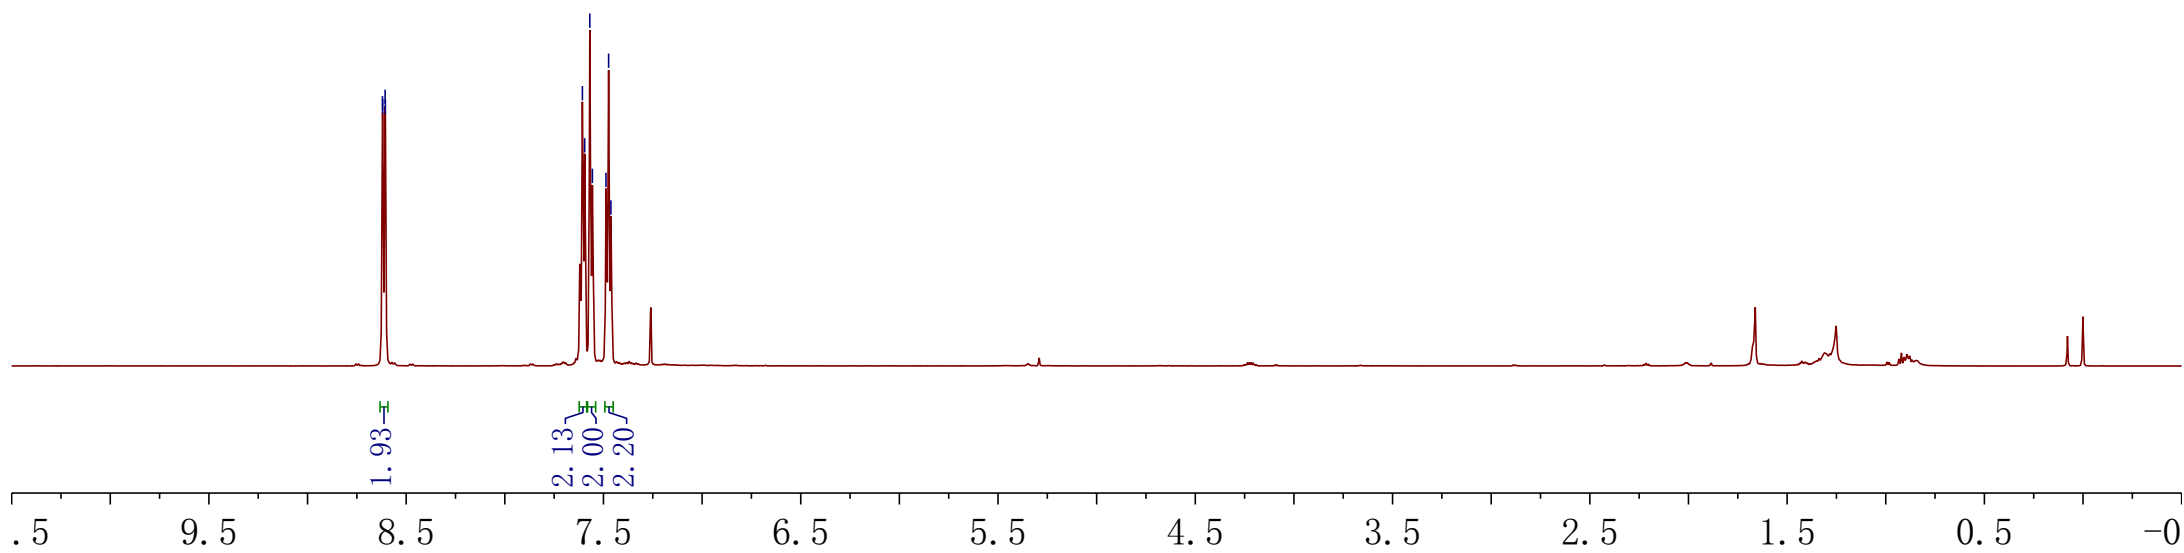



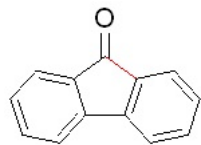

2v

7.65  
7.64  
7.51  
7.50  
7.48  
7.47  
7.46  
7.29  
7.28  
7.27

33

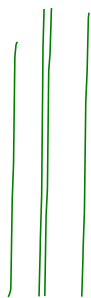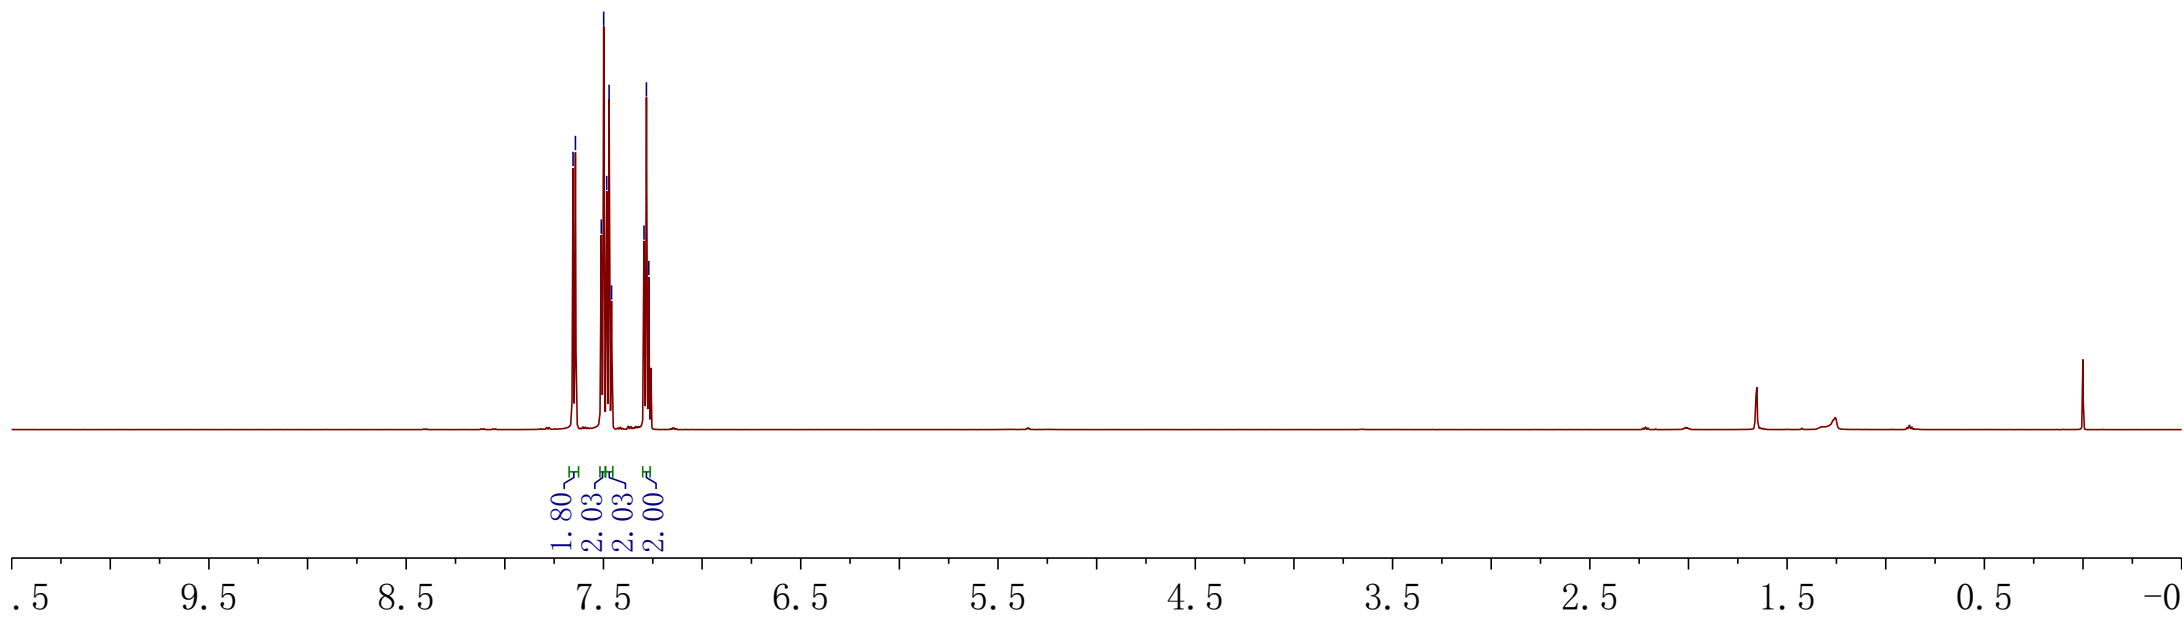

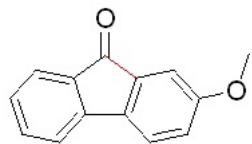

2w

7.60  
7.59  
7.44  
7.43  
7.41  
7.40  
7.38  
7.20  
7.20  
7.19  
7.18  
6.98  
6.98  
6.97  
6.96

34

3.85

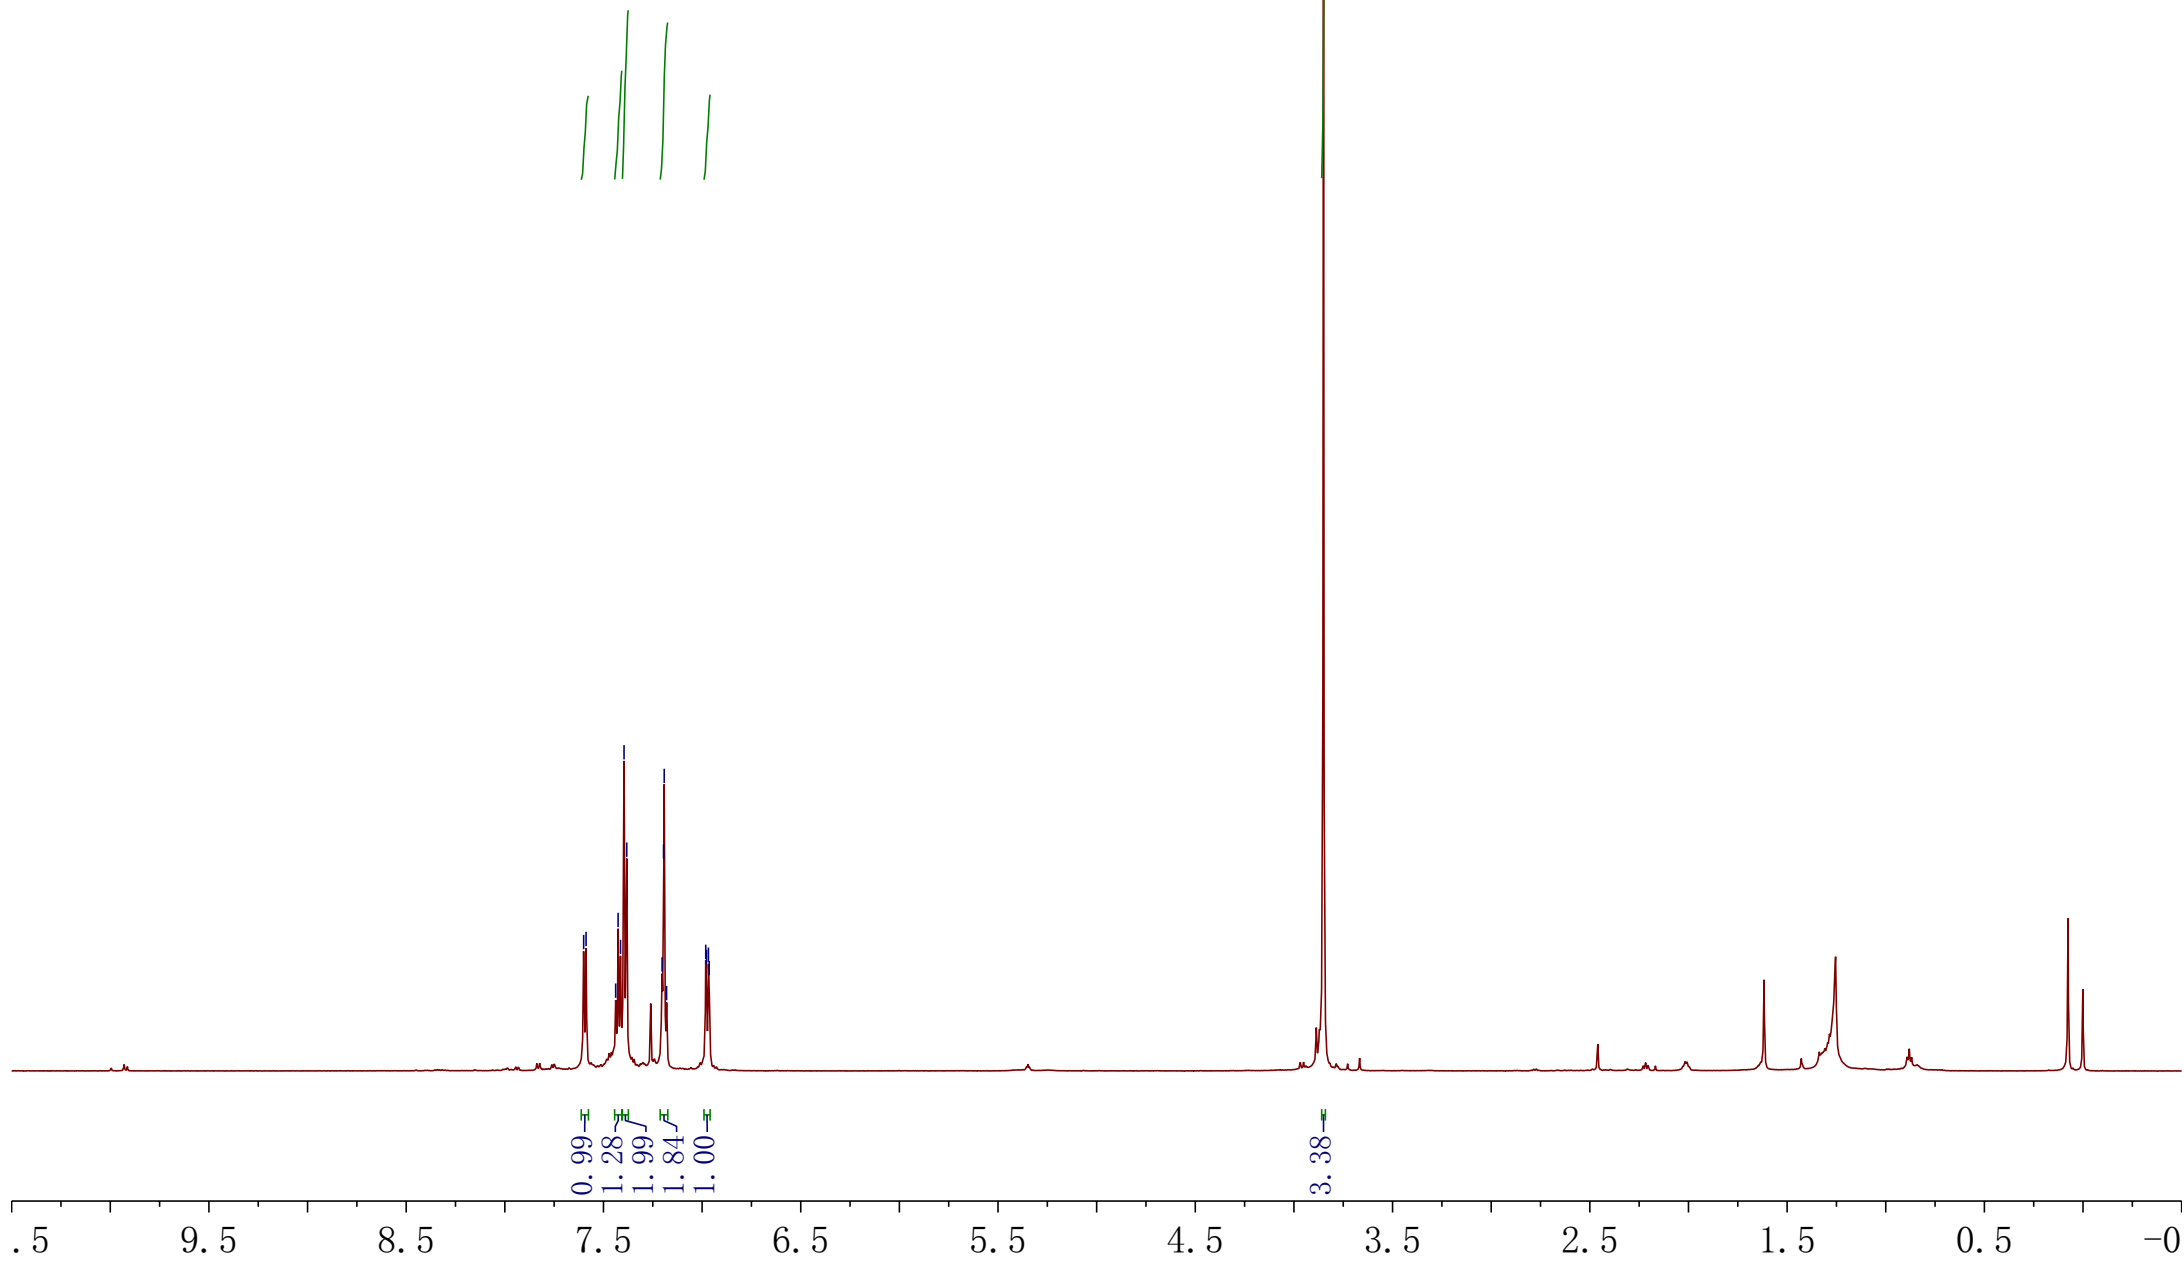

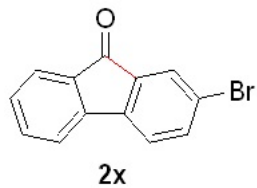

7.75  
7.65  
7.64  
7.60  
7.60  
7.59  
7.59  
7.50  
7.50  
7.49  
7.38  
7.37  
7.33  
7.33  
7.32  
7.31  
7.31  
7.30  
7.29

35

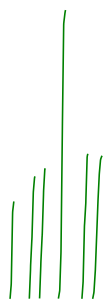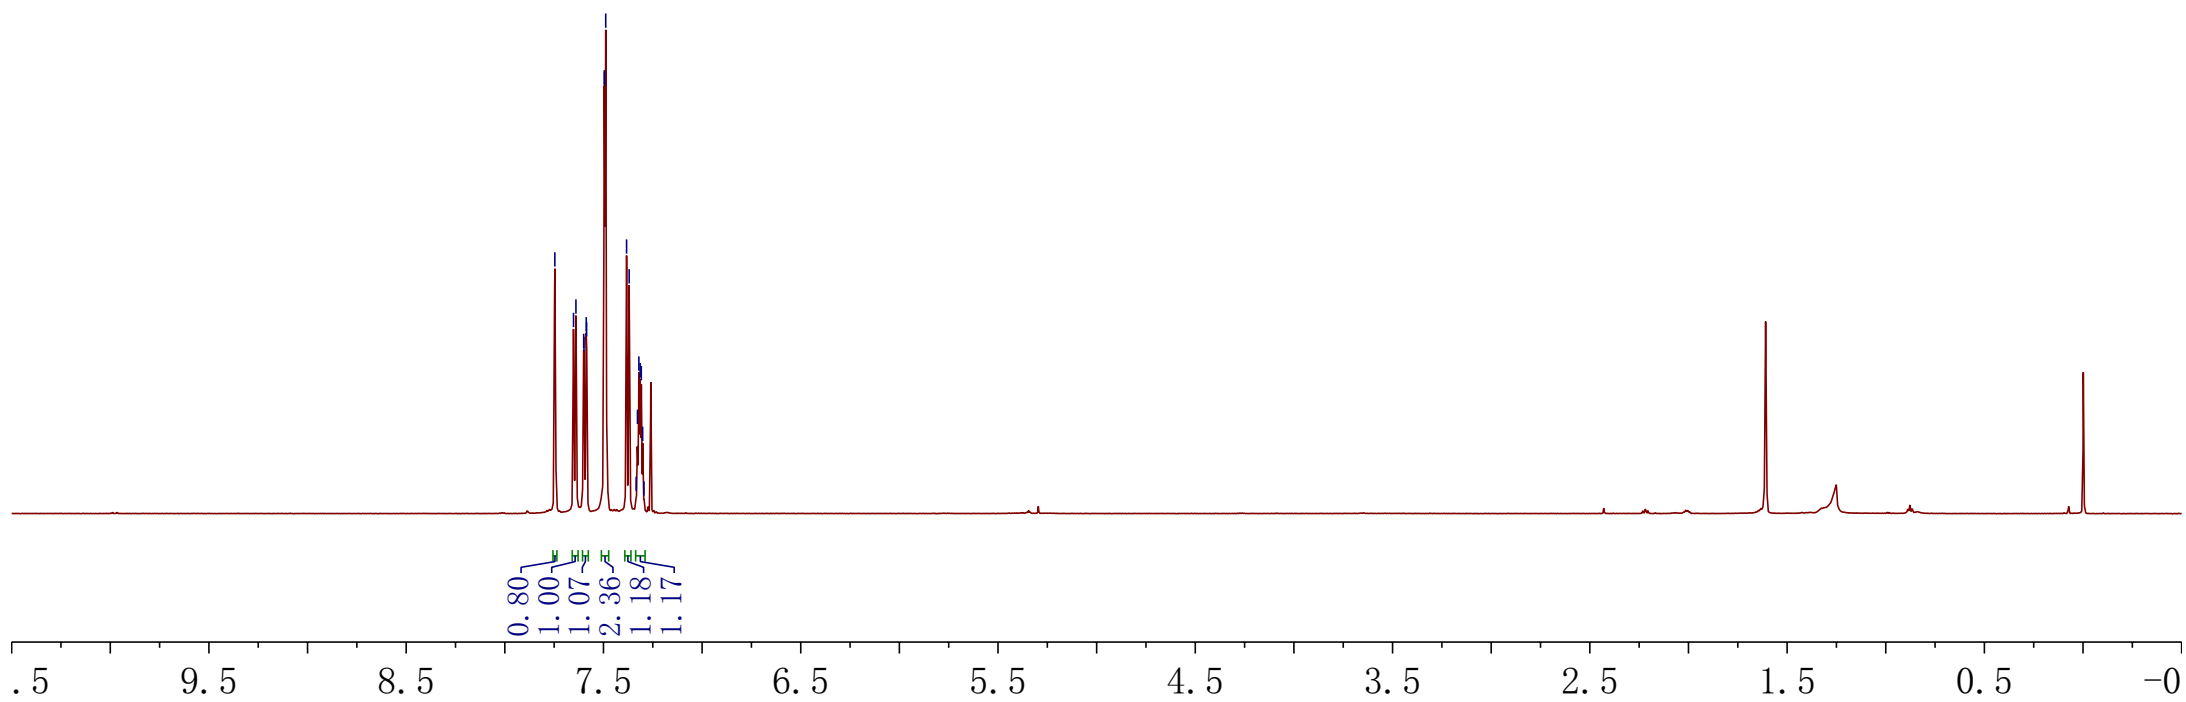

0.80  
1.00  
1.07  
2.36  
1.18  
1.17

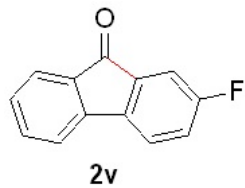

7.64  
7.63  
7.49  
7.47  
7.46  
7.45  
7.44  
7.32  
7.32  
7.31  
7.31  
7.16  
7.15  
7.14  
7.14  
7.13  
7.13

36

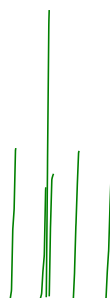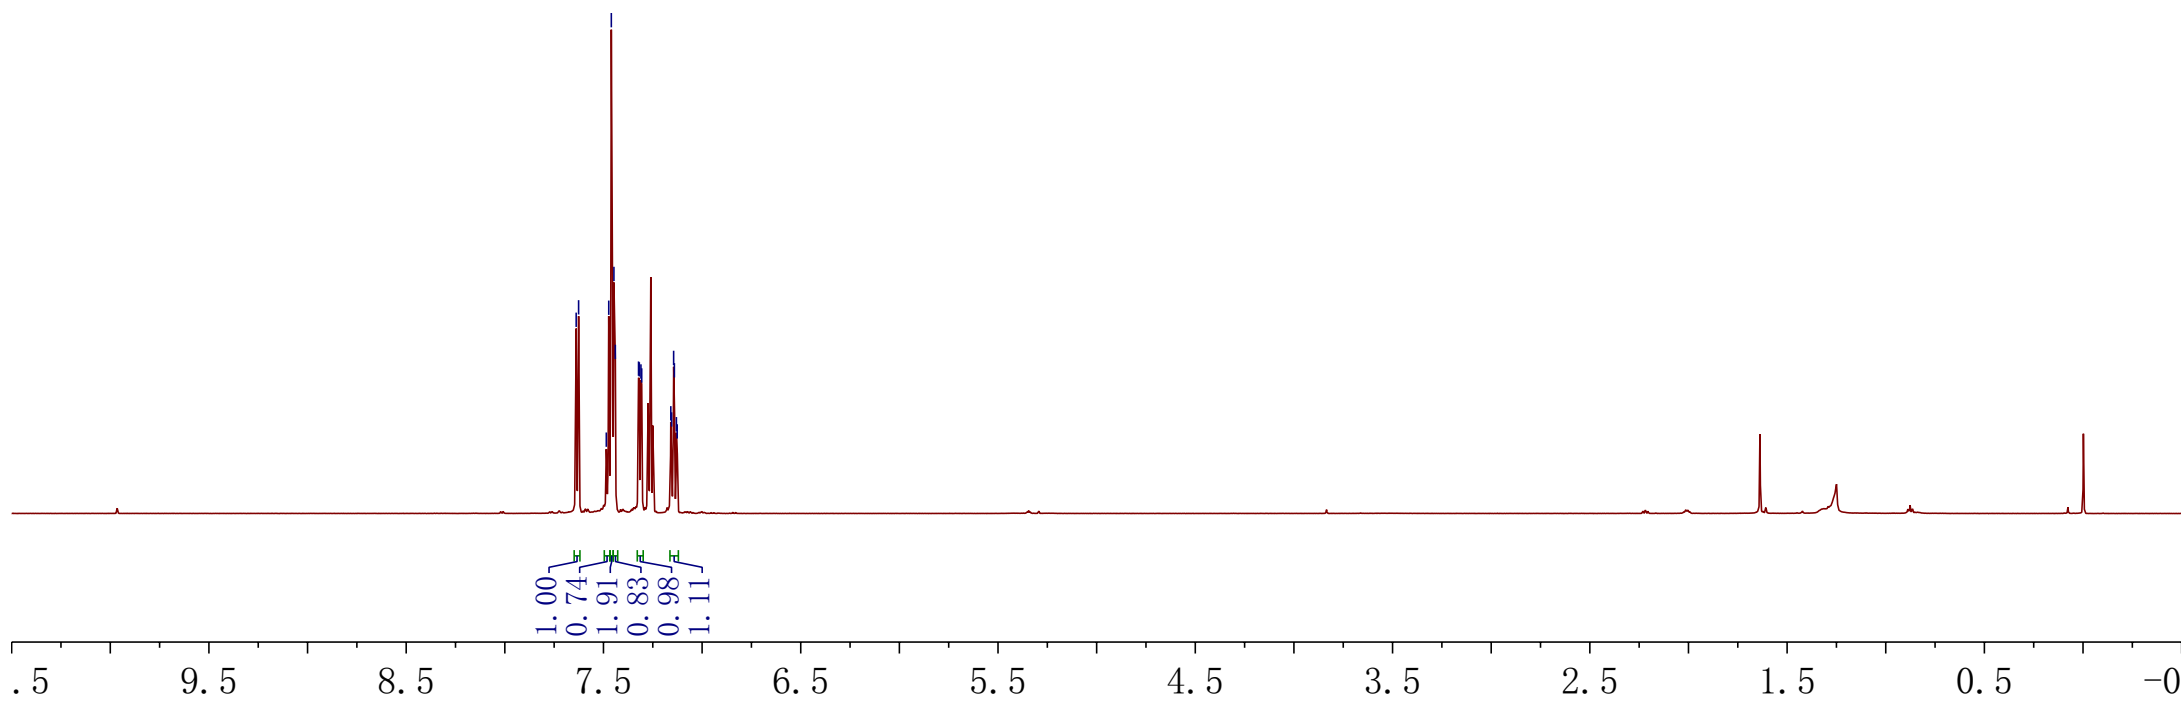

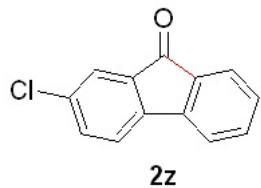

7.66  
7.64  
7.60  
7.50  
7.49  
7.49  
7.44  
7.33  
7.32  
7.31  
7.31  
7.30  
7.30  
7.30  
7.29  
7.28

37

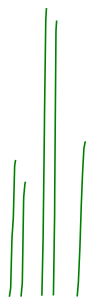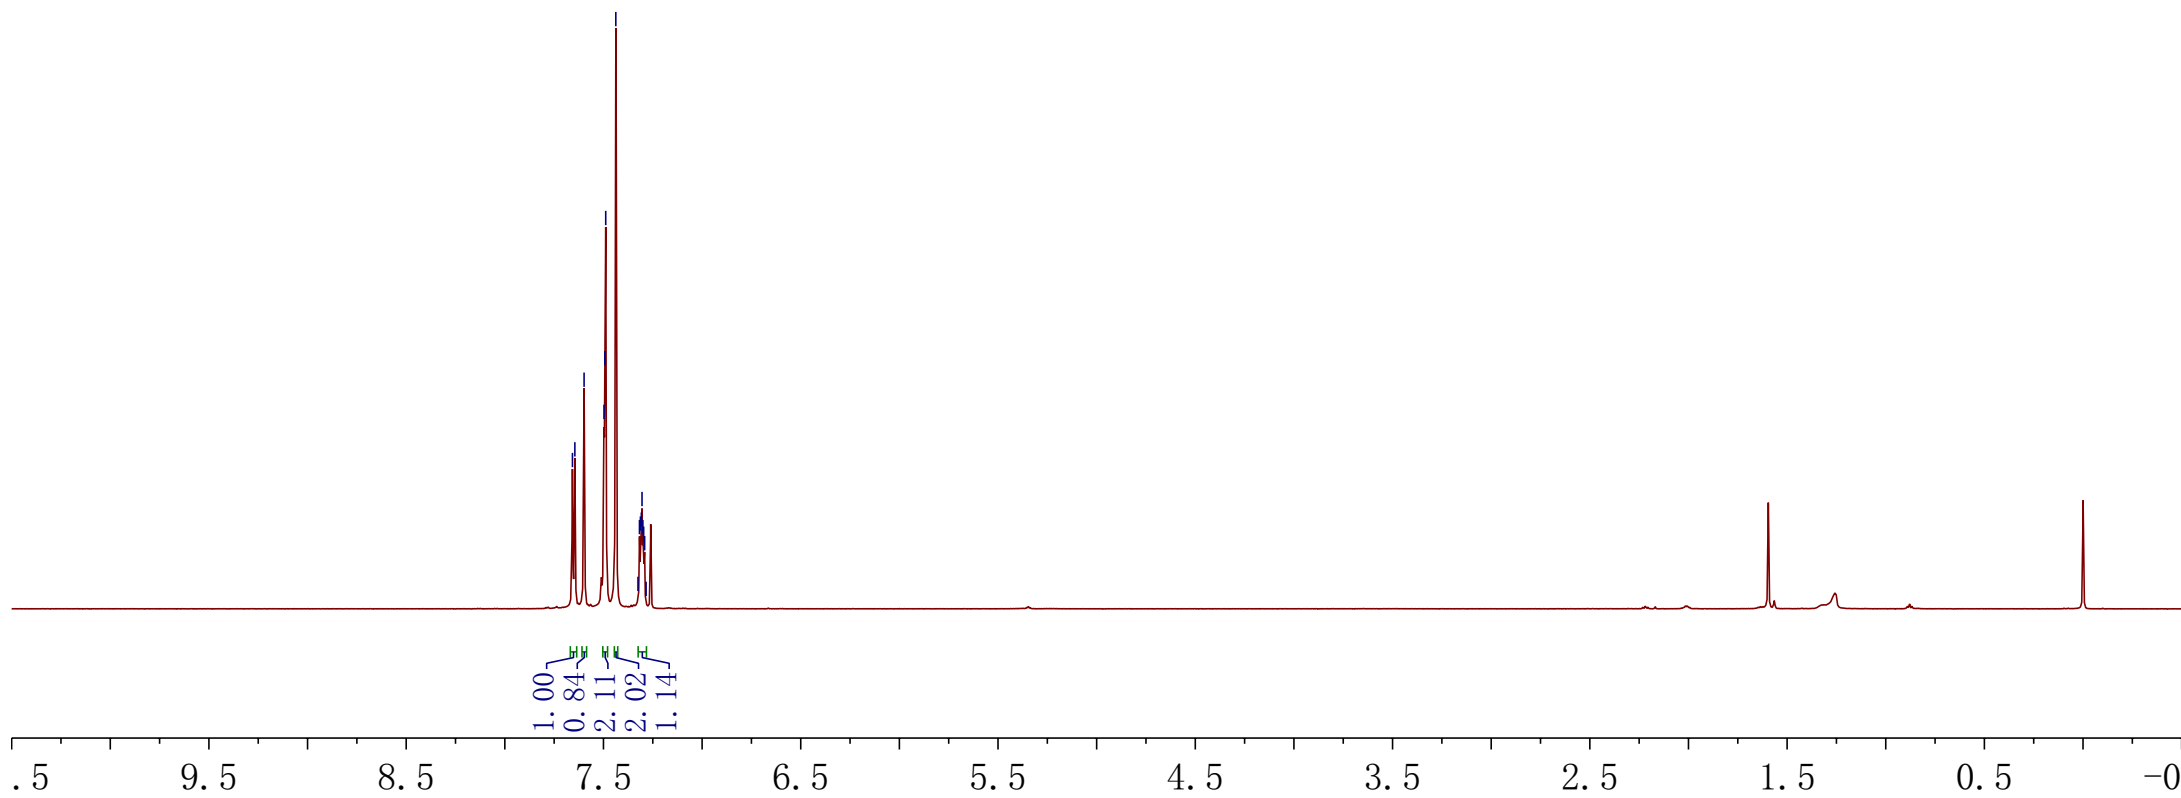

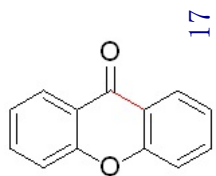

2a

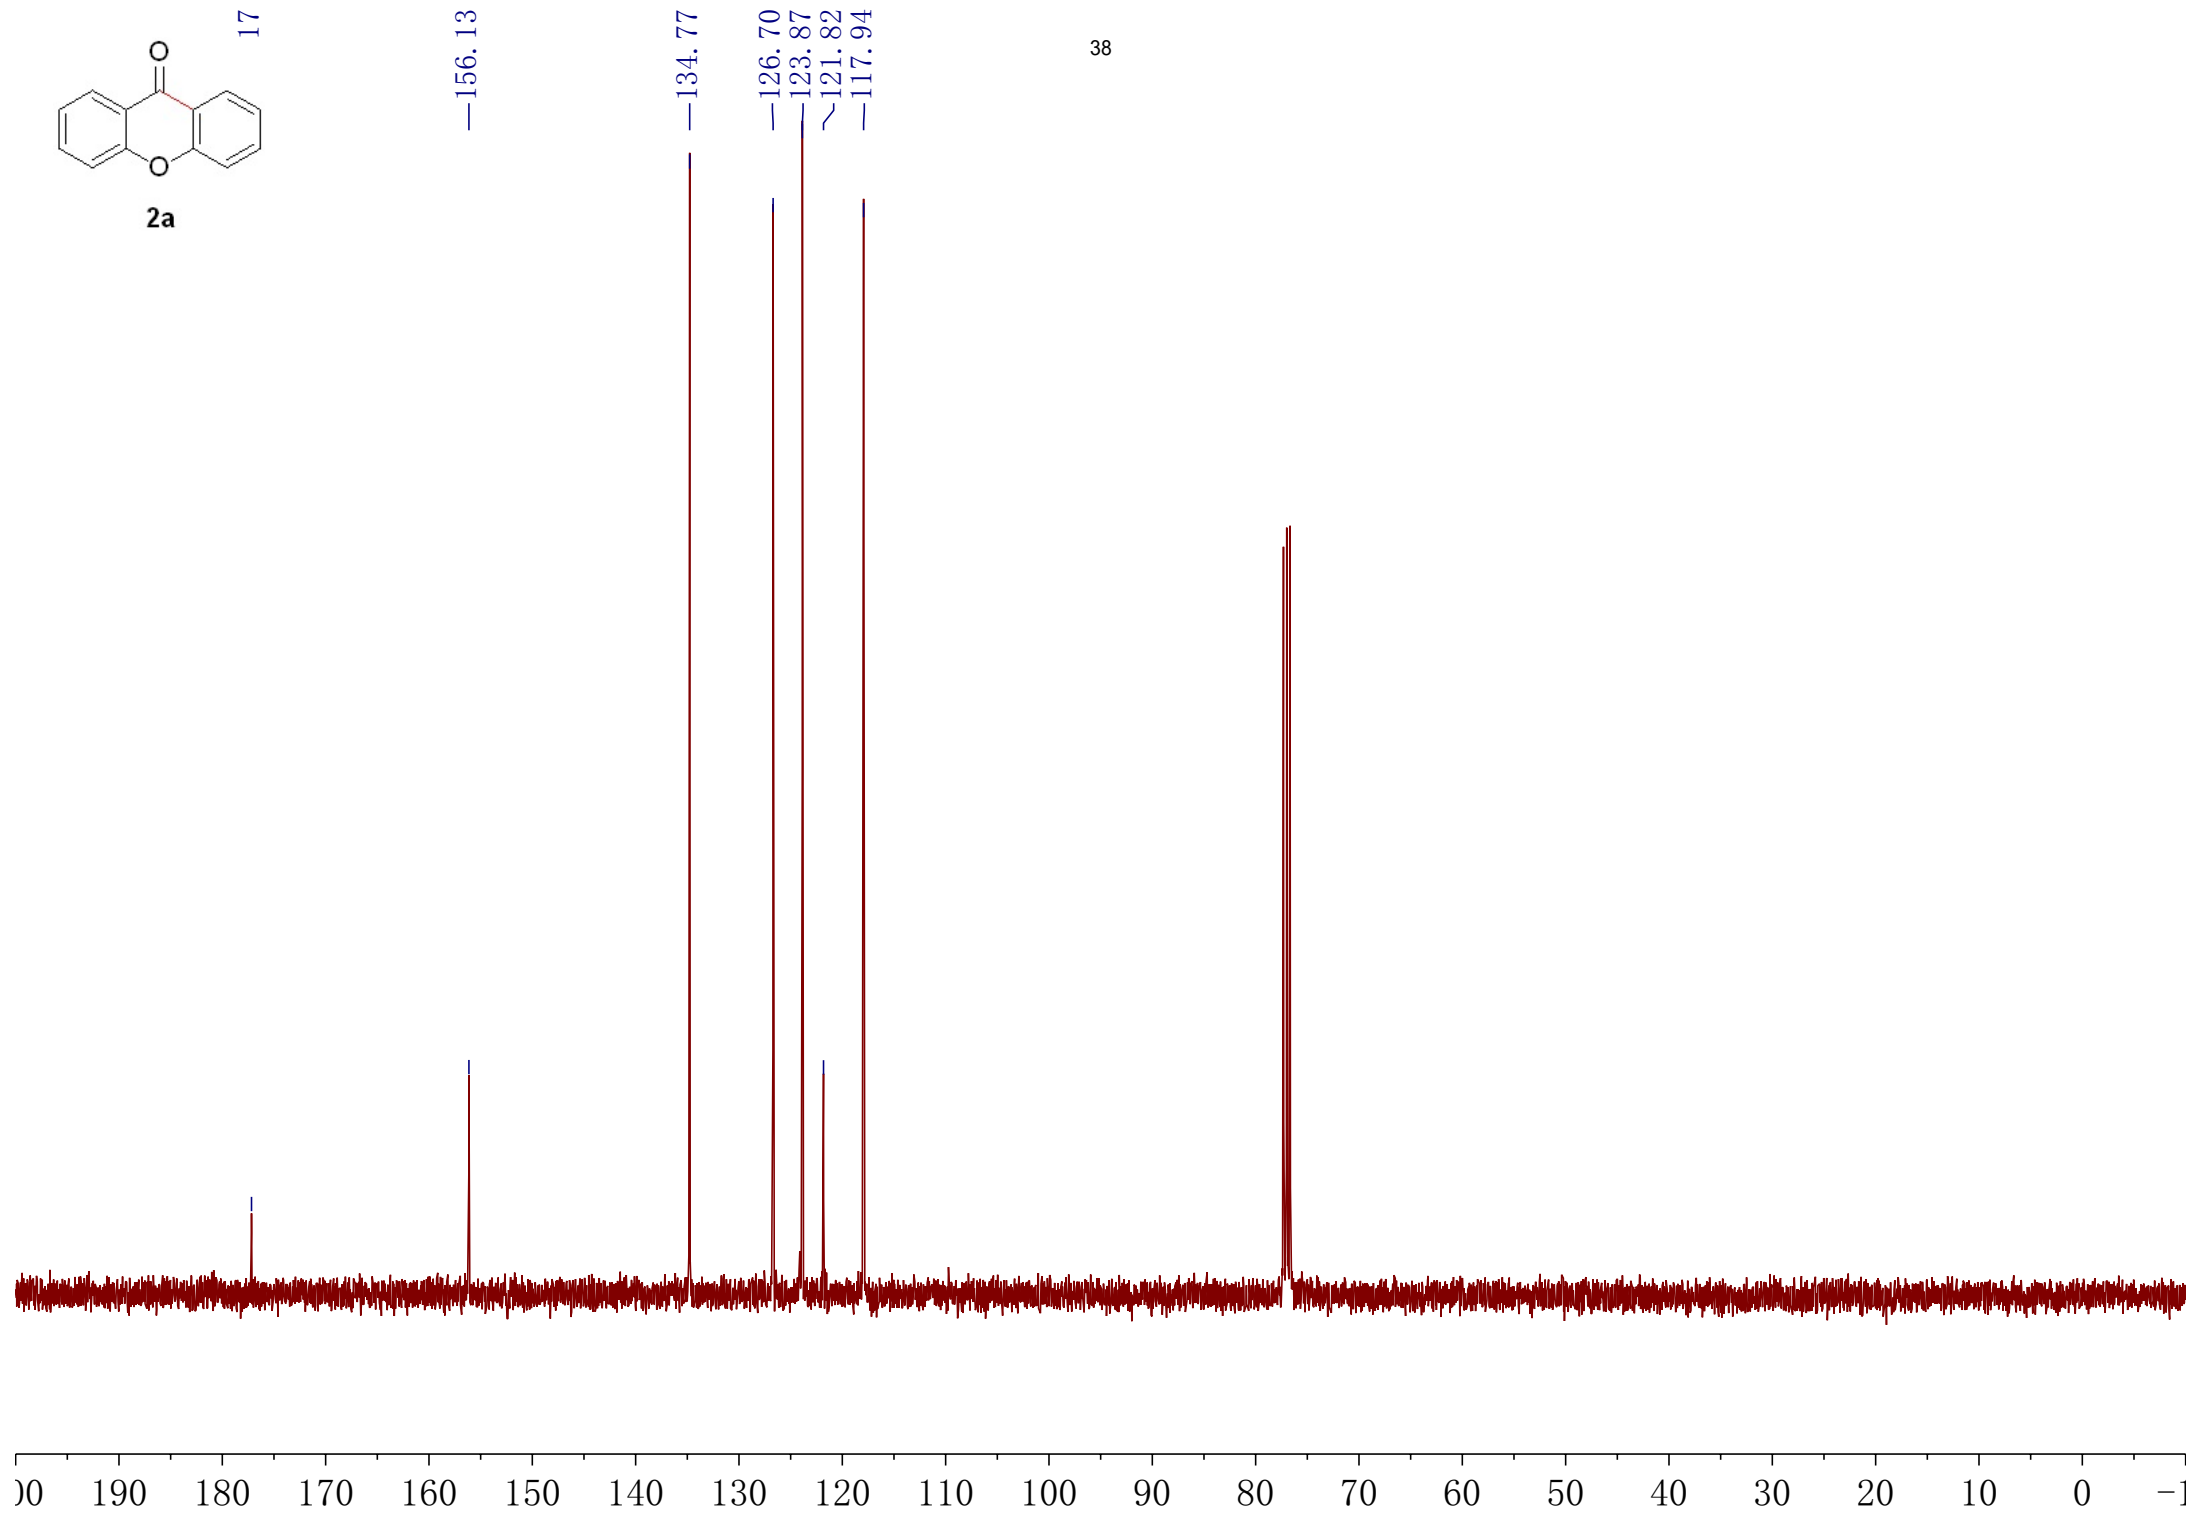

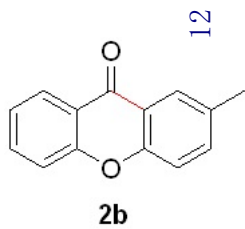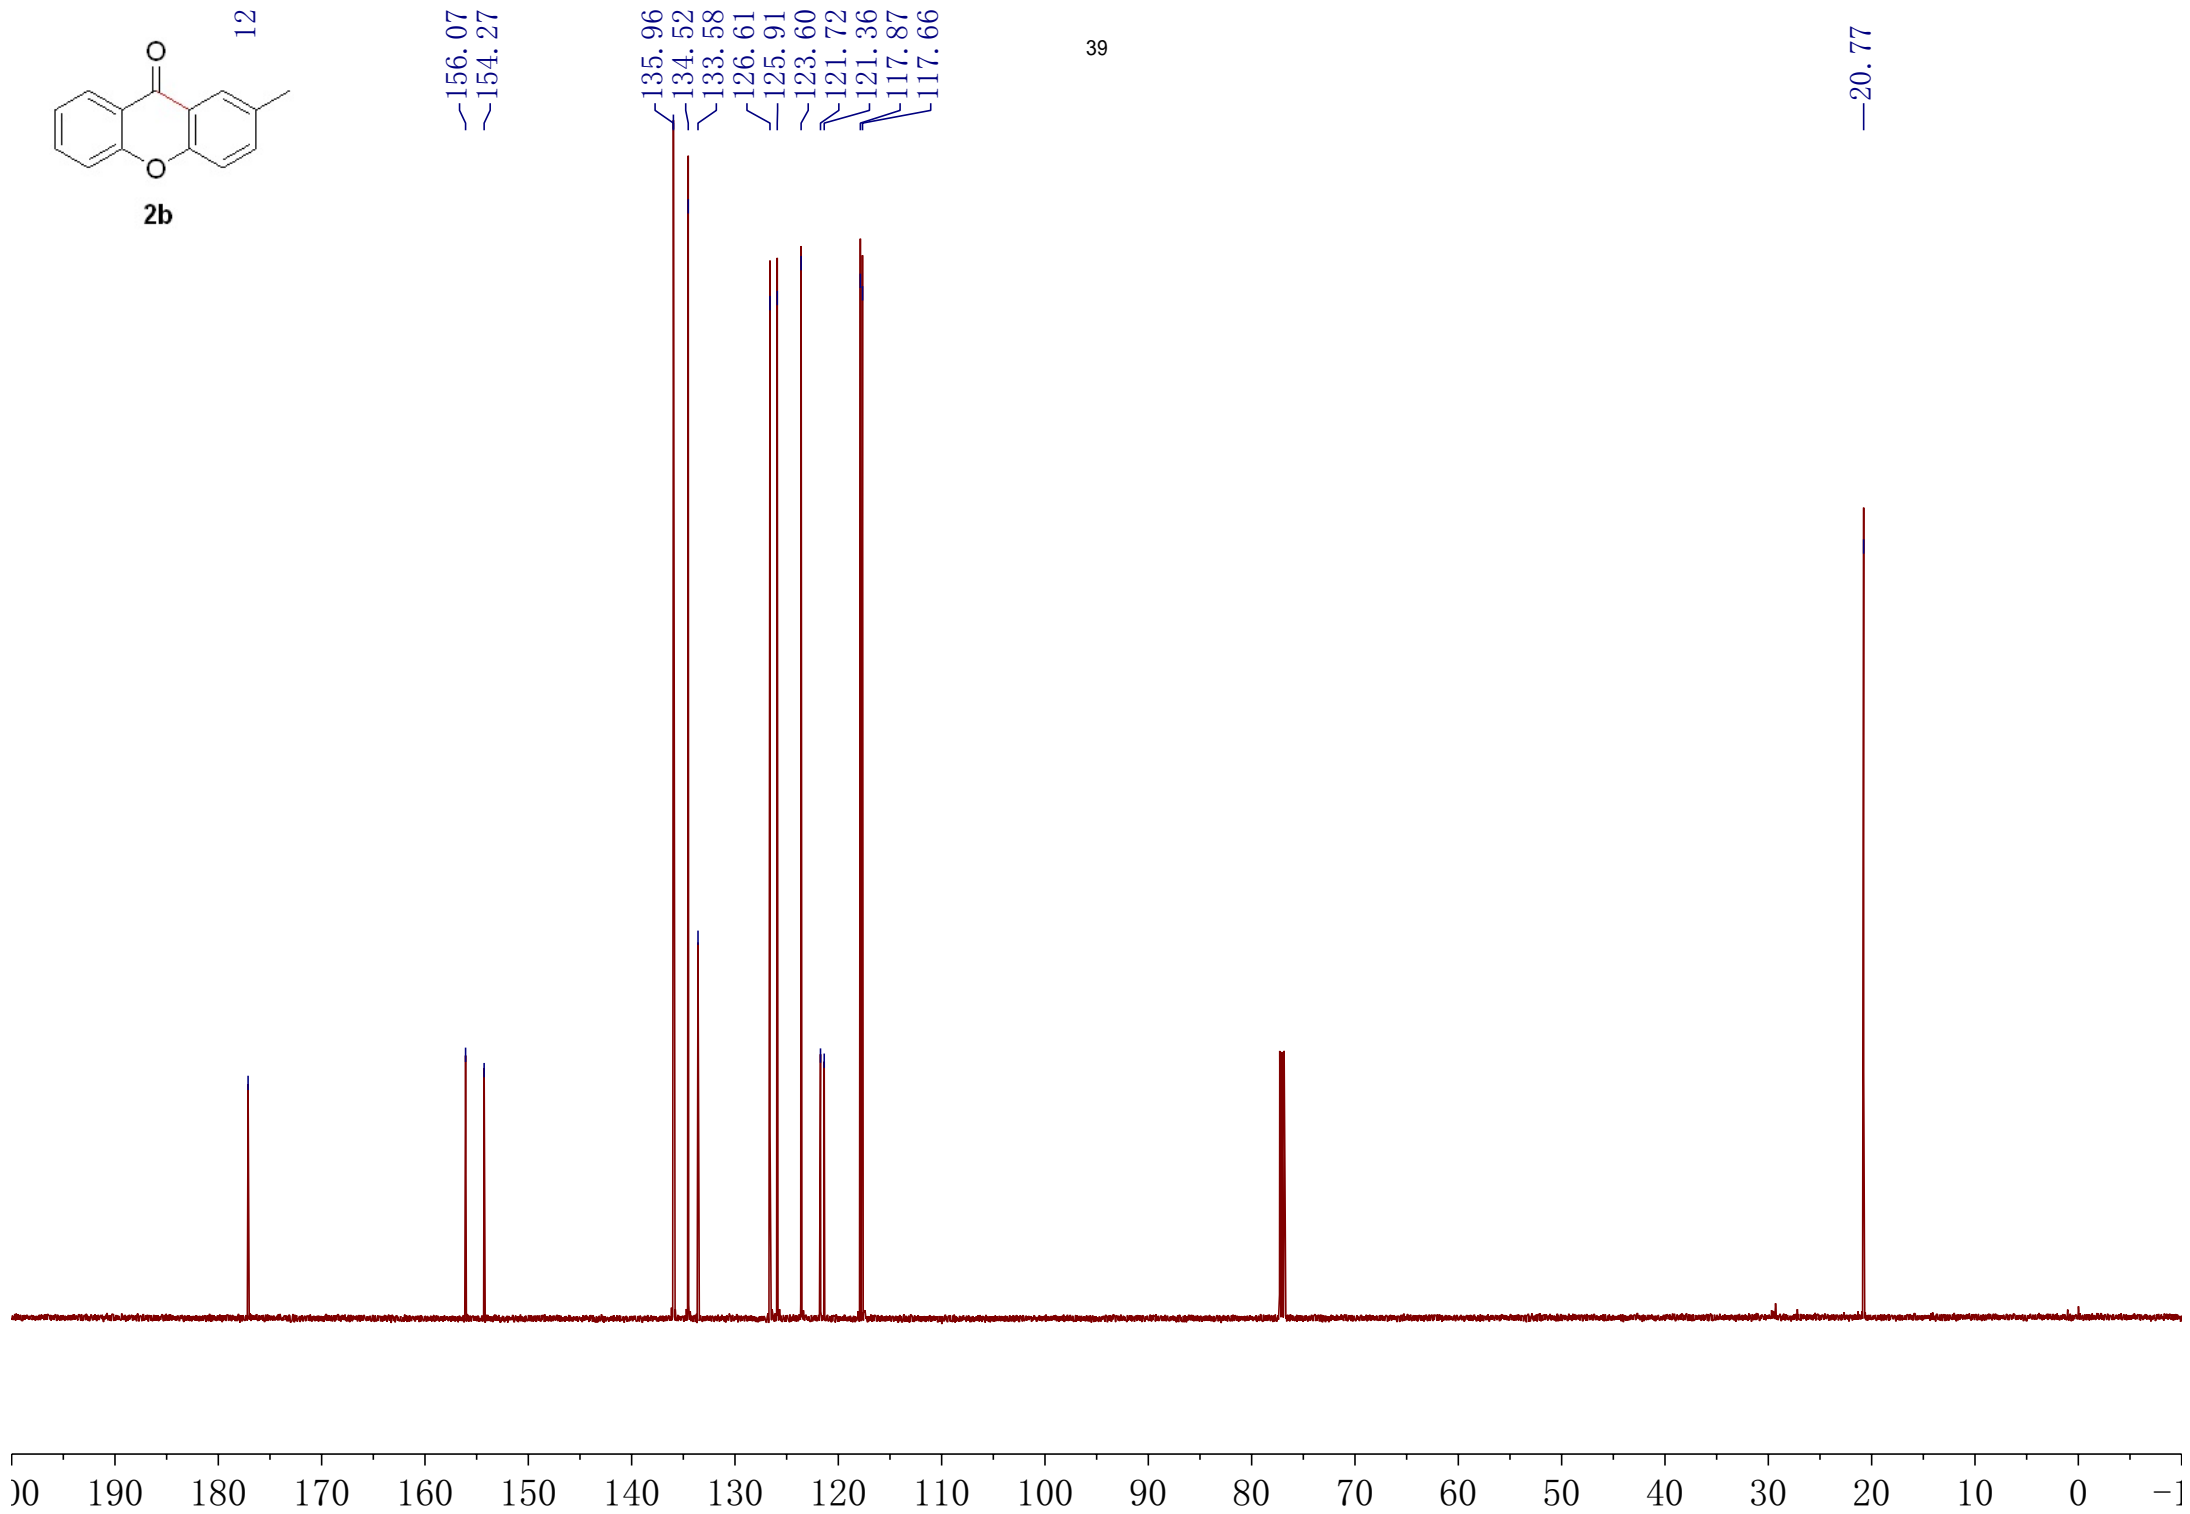

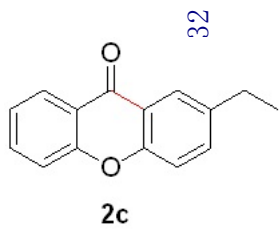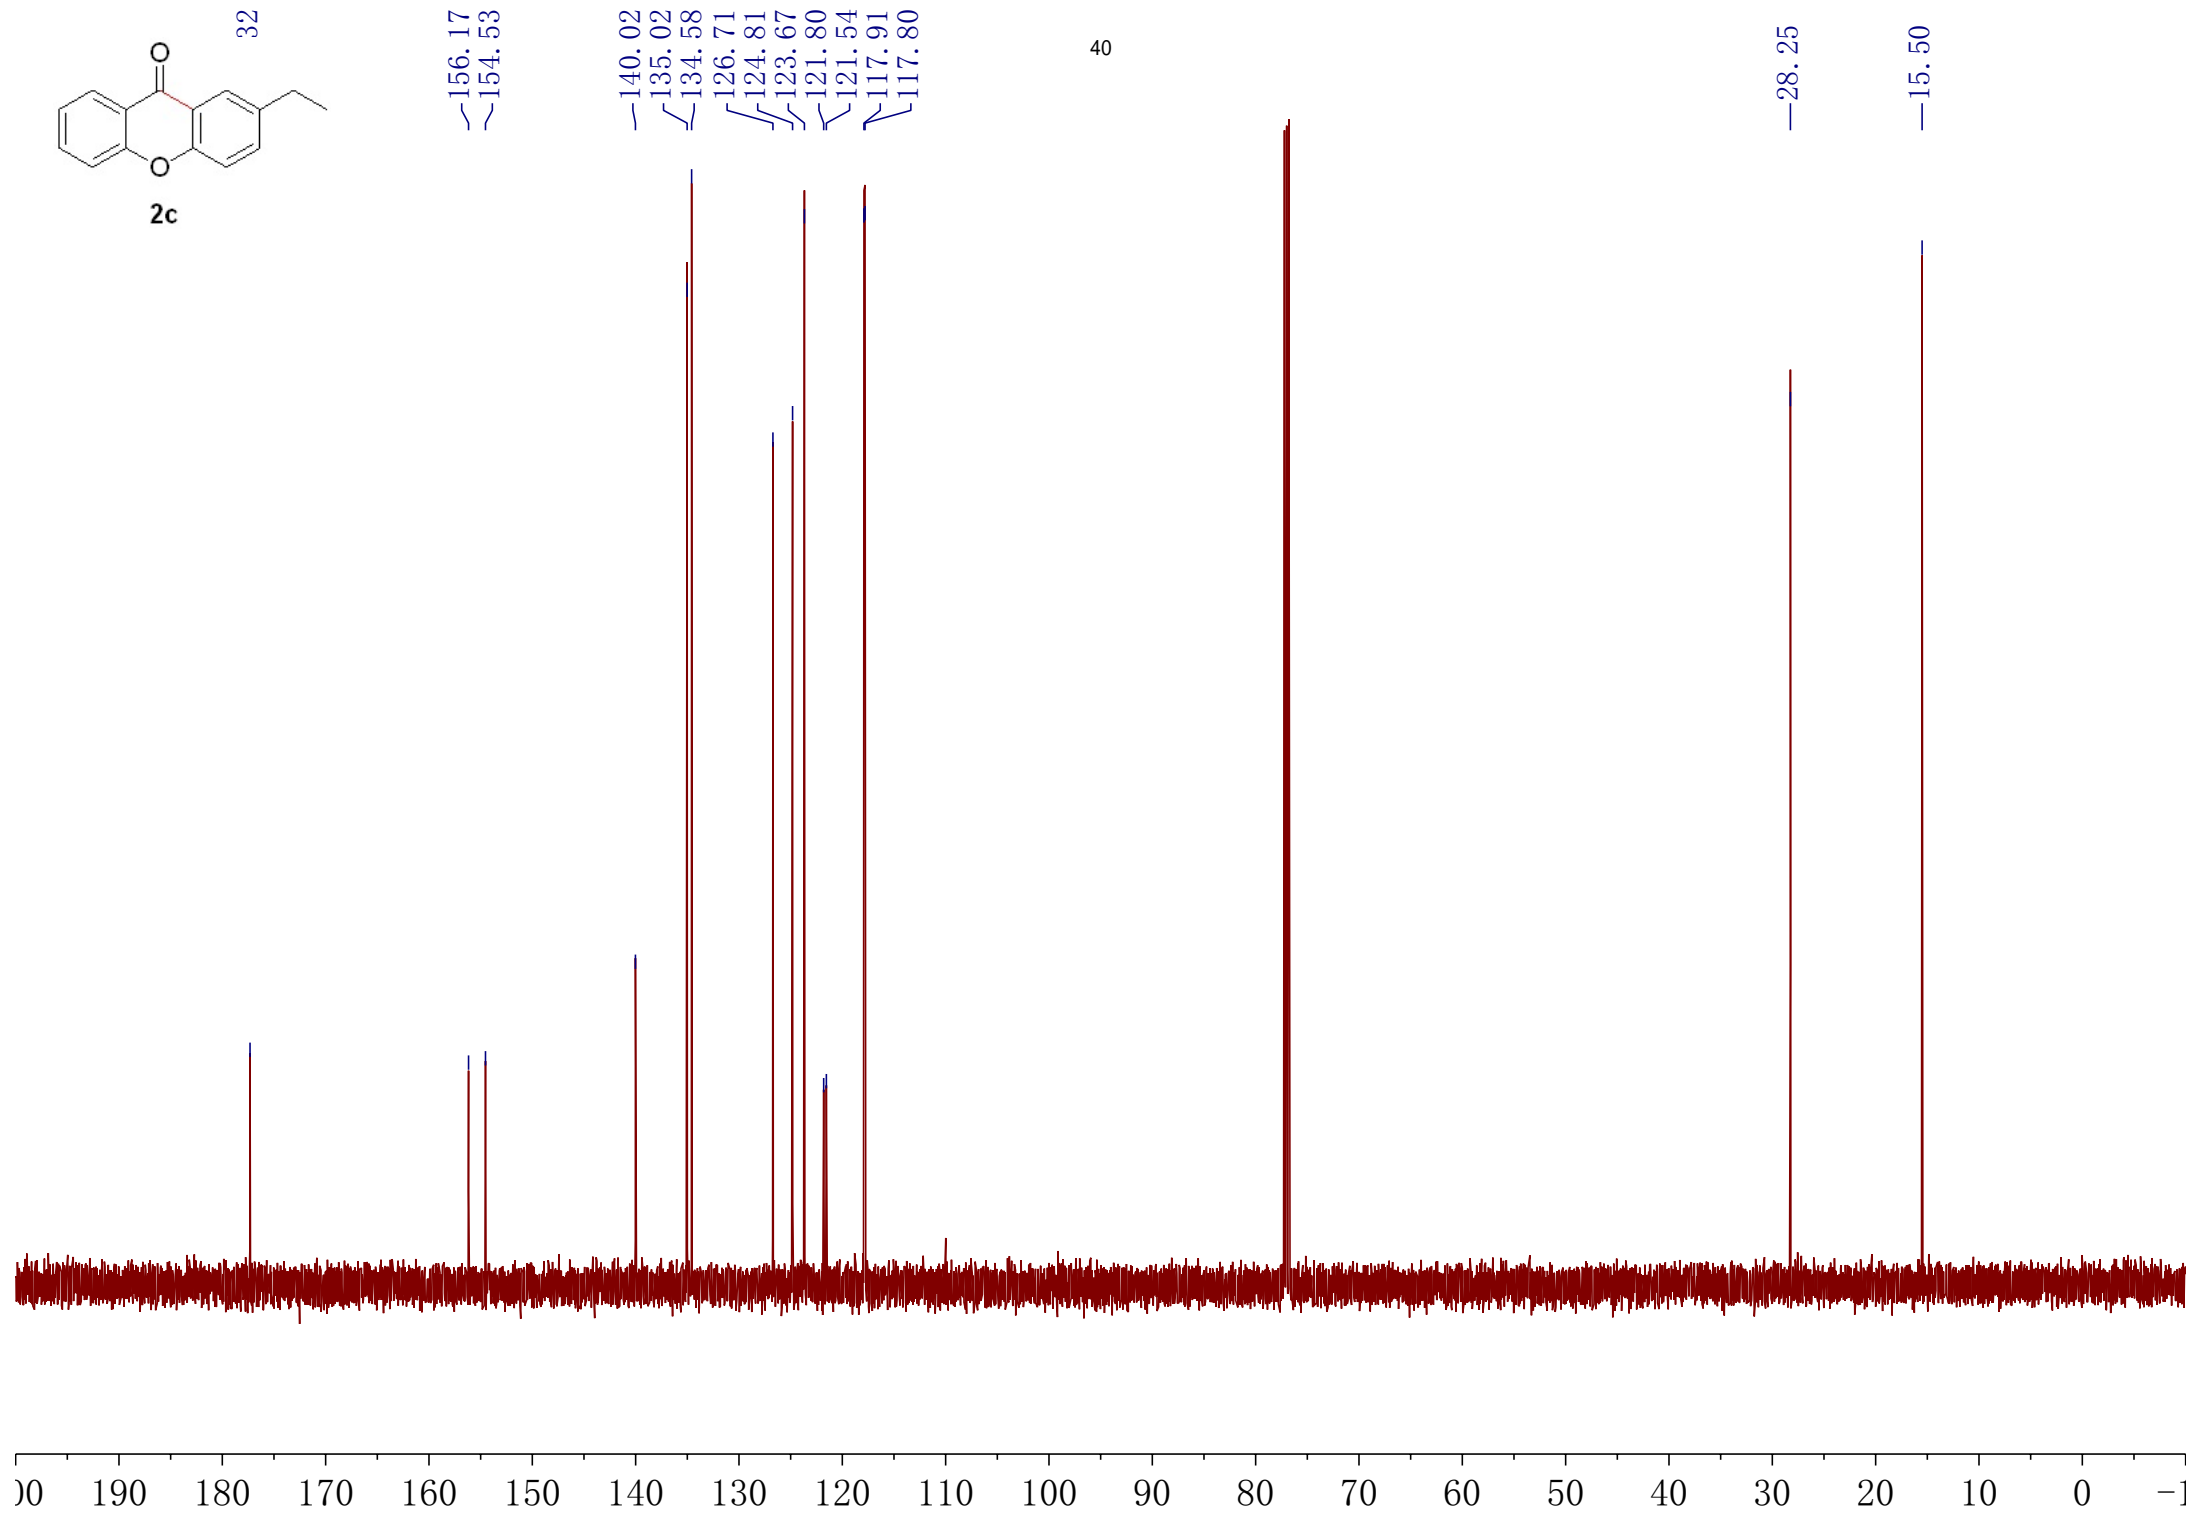



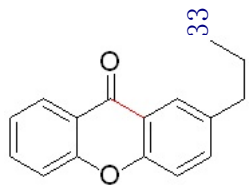

2d

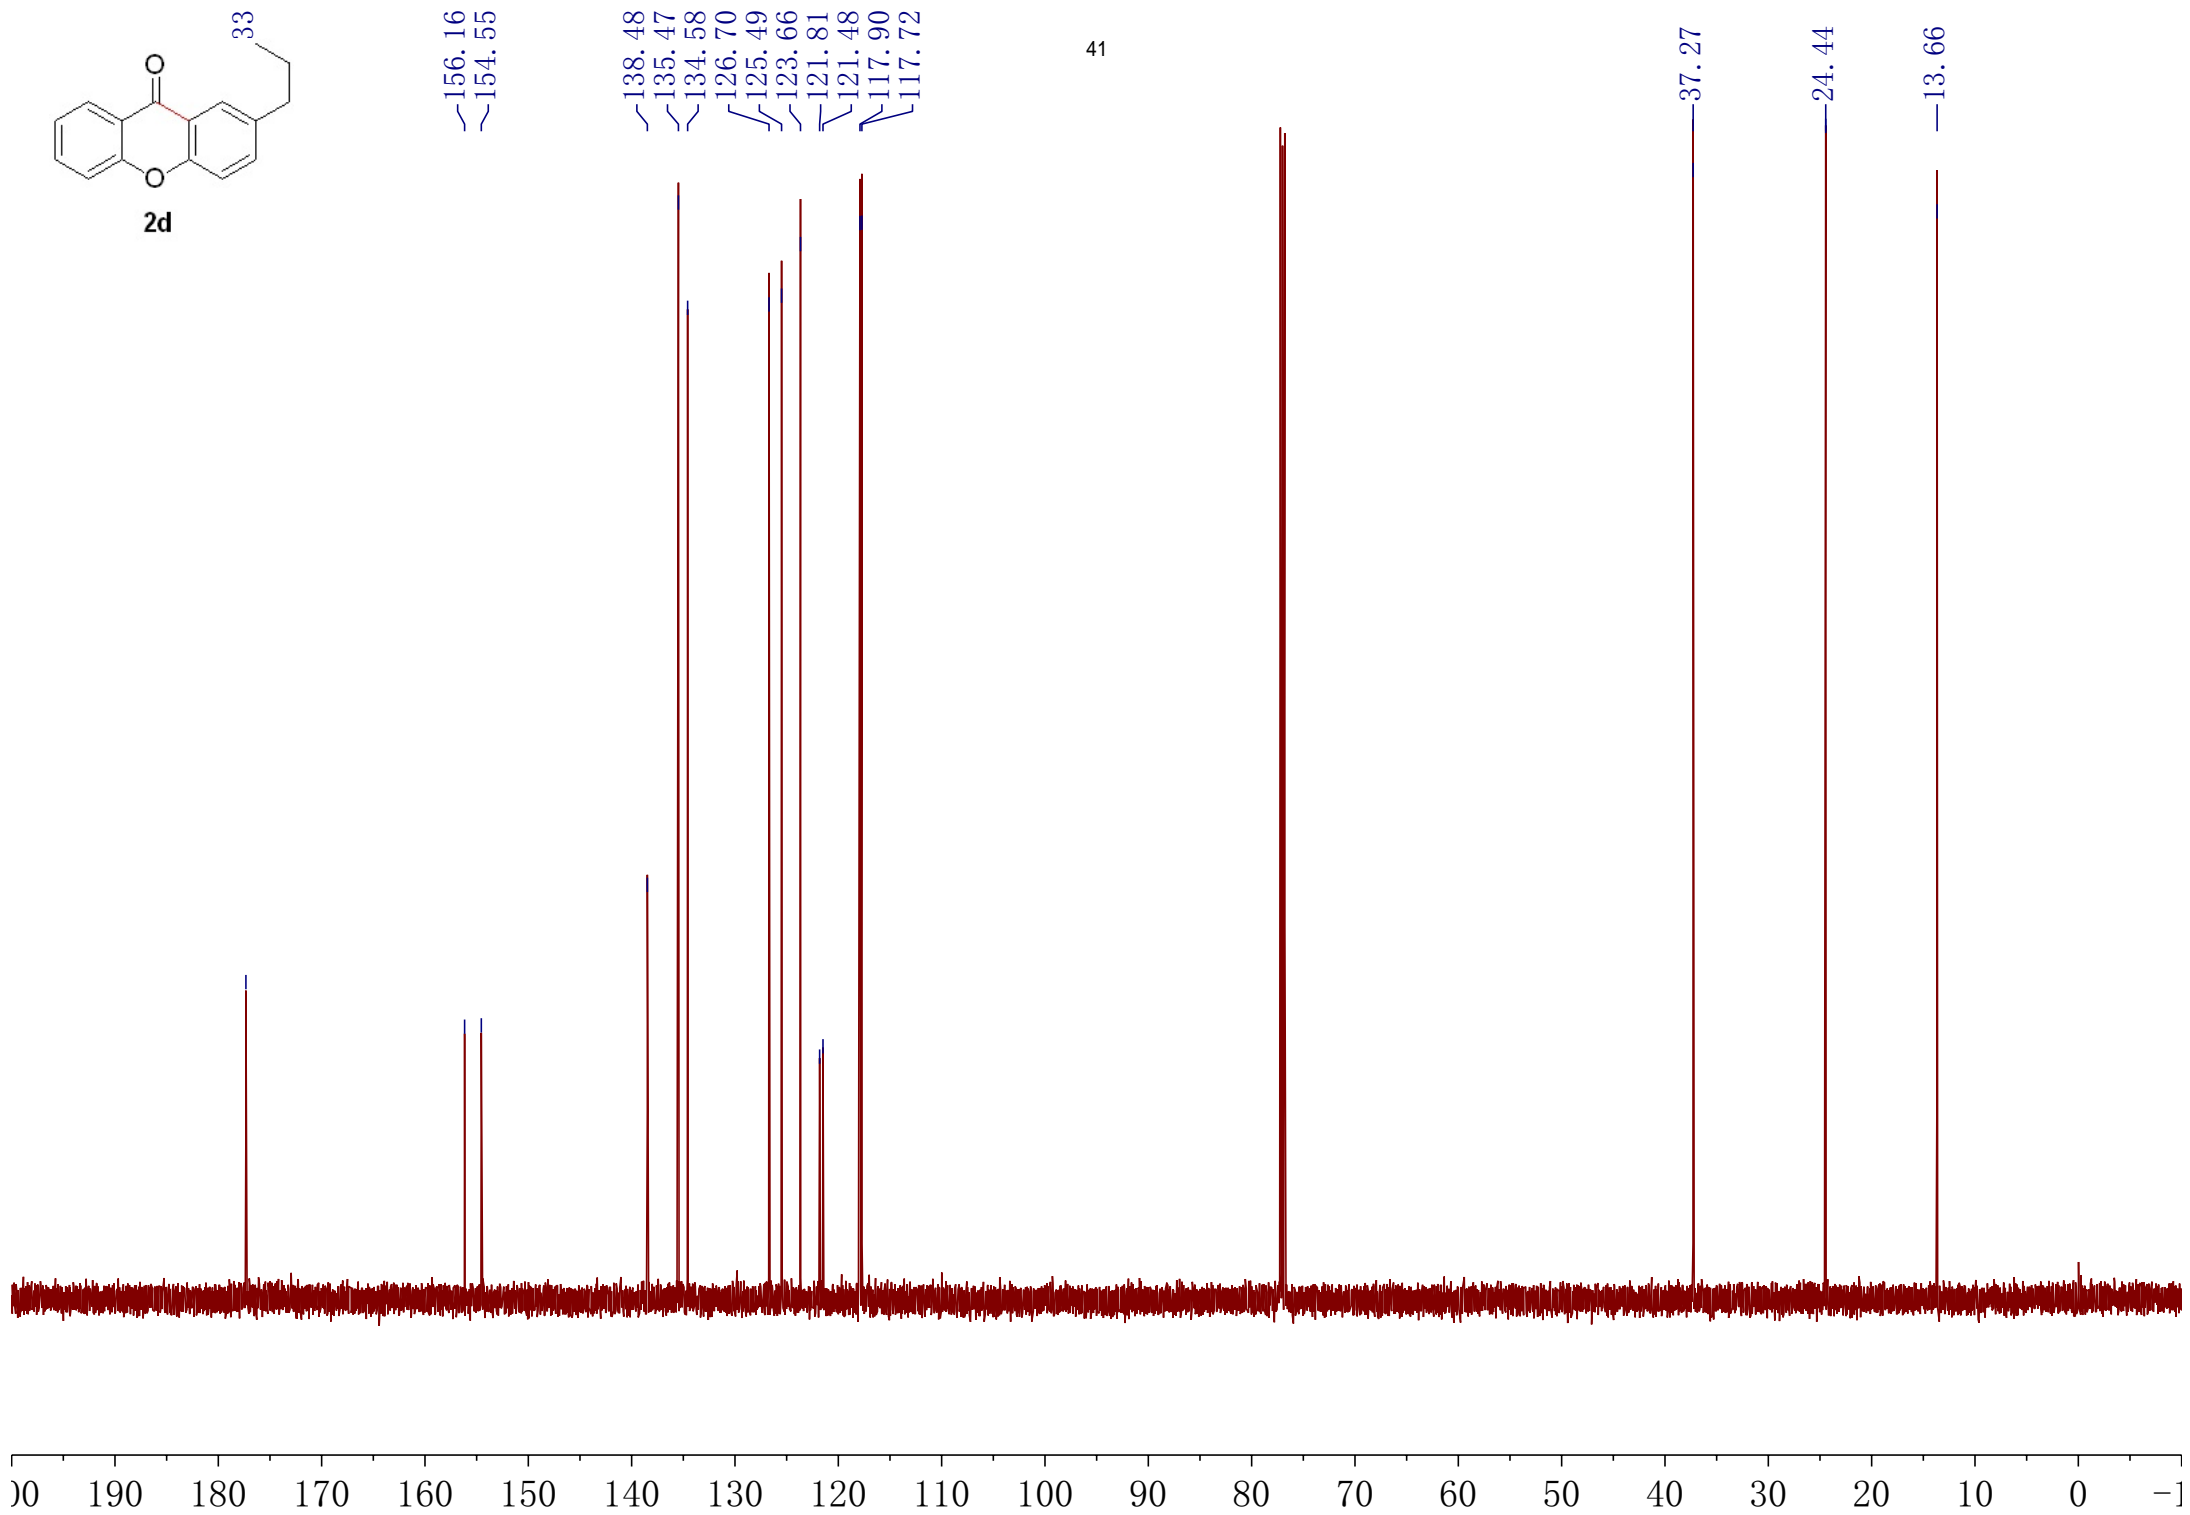

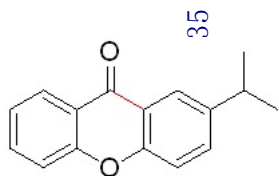

2e

~156.16  
~154.56  
—144.66  
~134.57  
~133.72  
~126.71  
~123.66  
~123.41  
~121.79  
~121.51  
~117.89  
~117.81

42

—33.67

—23.96

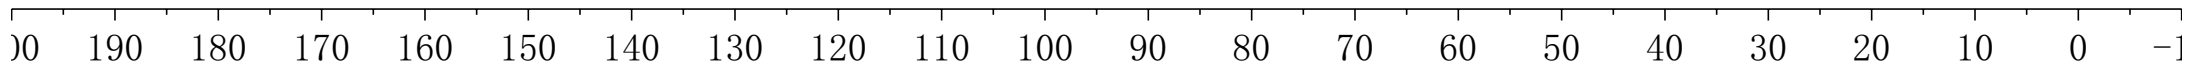

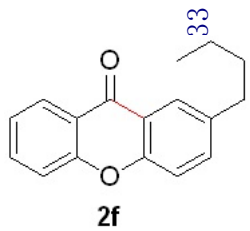

- 156.17
- 154.52
- 138.72
- 135.45
- 134.58
- 126.71
- 125.41
- 123.66
- 121.81
- 121.49
- 117.90
- 117.72

43

- 34.93
- 33.50
- 22.23
- 13.89

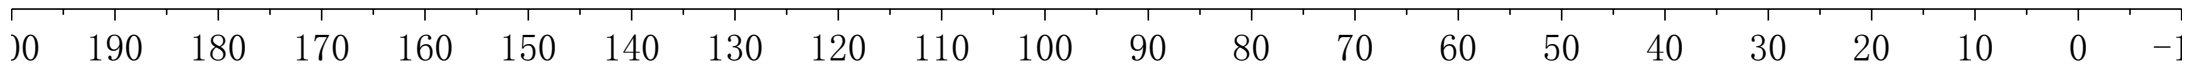

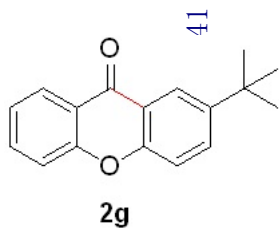

~156.14  
~154.30  
—147.04  
~134.56  
~132.73  
/126.73  
/123.66  
/122.40  
/121.82  
/121.12  
/117.88  
/117.56

44

—34.74  
—31.34



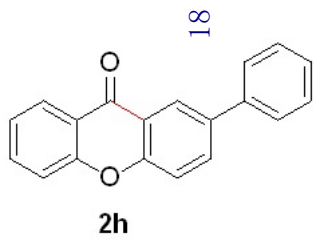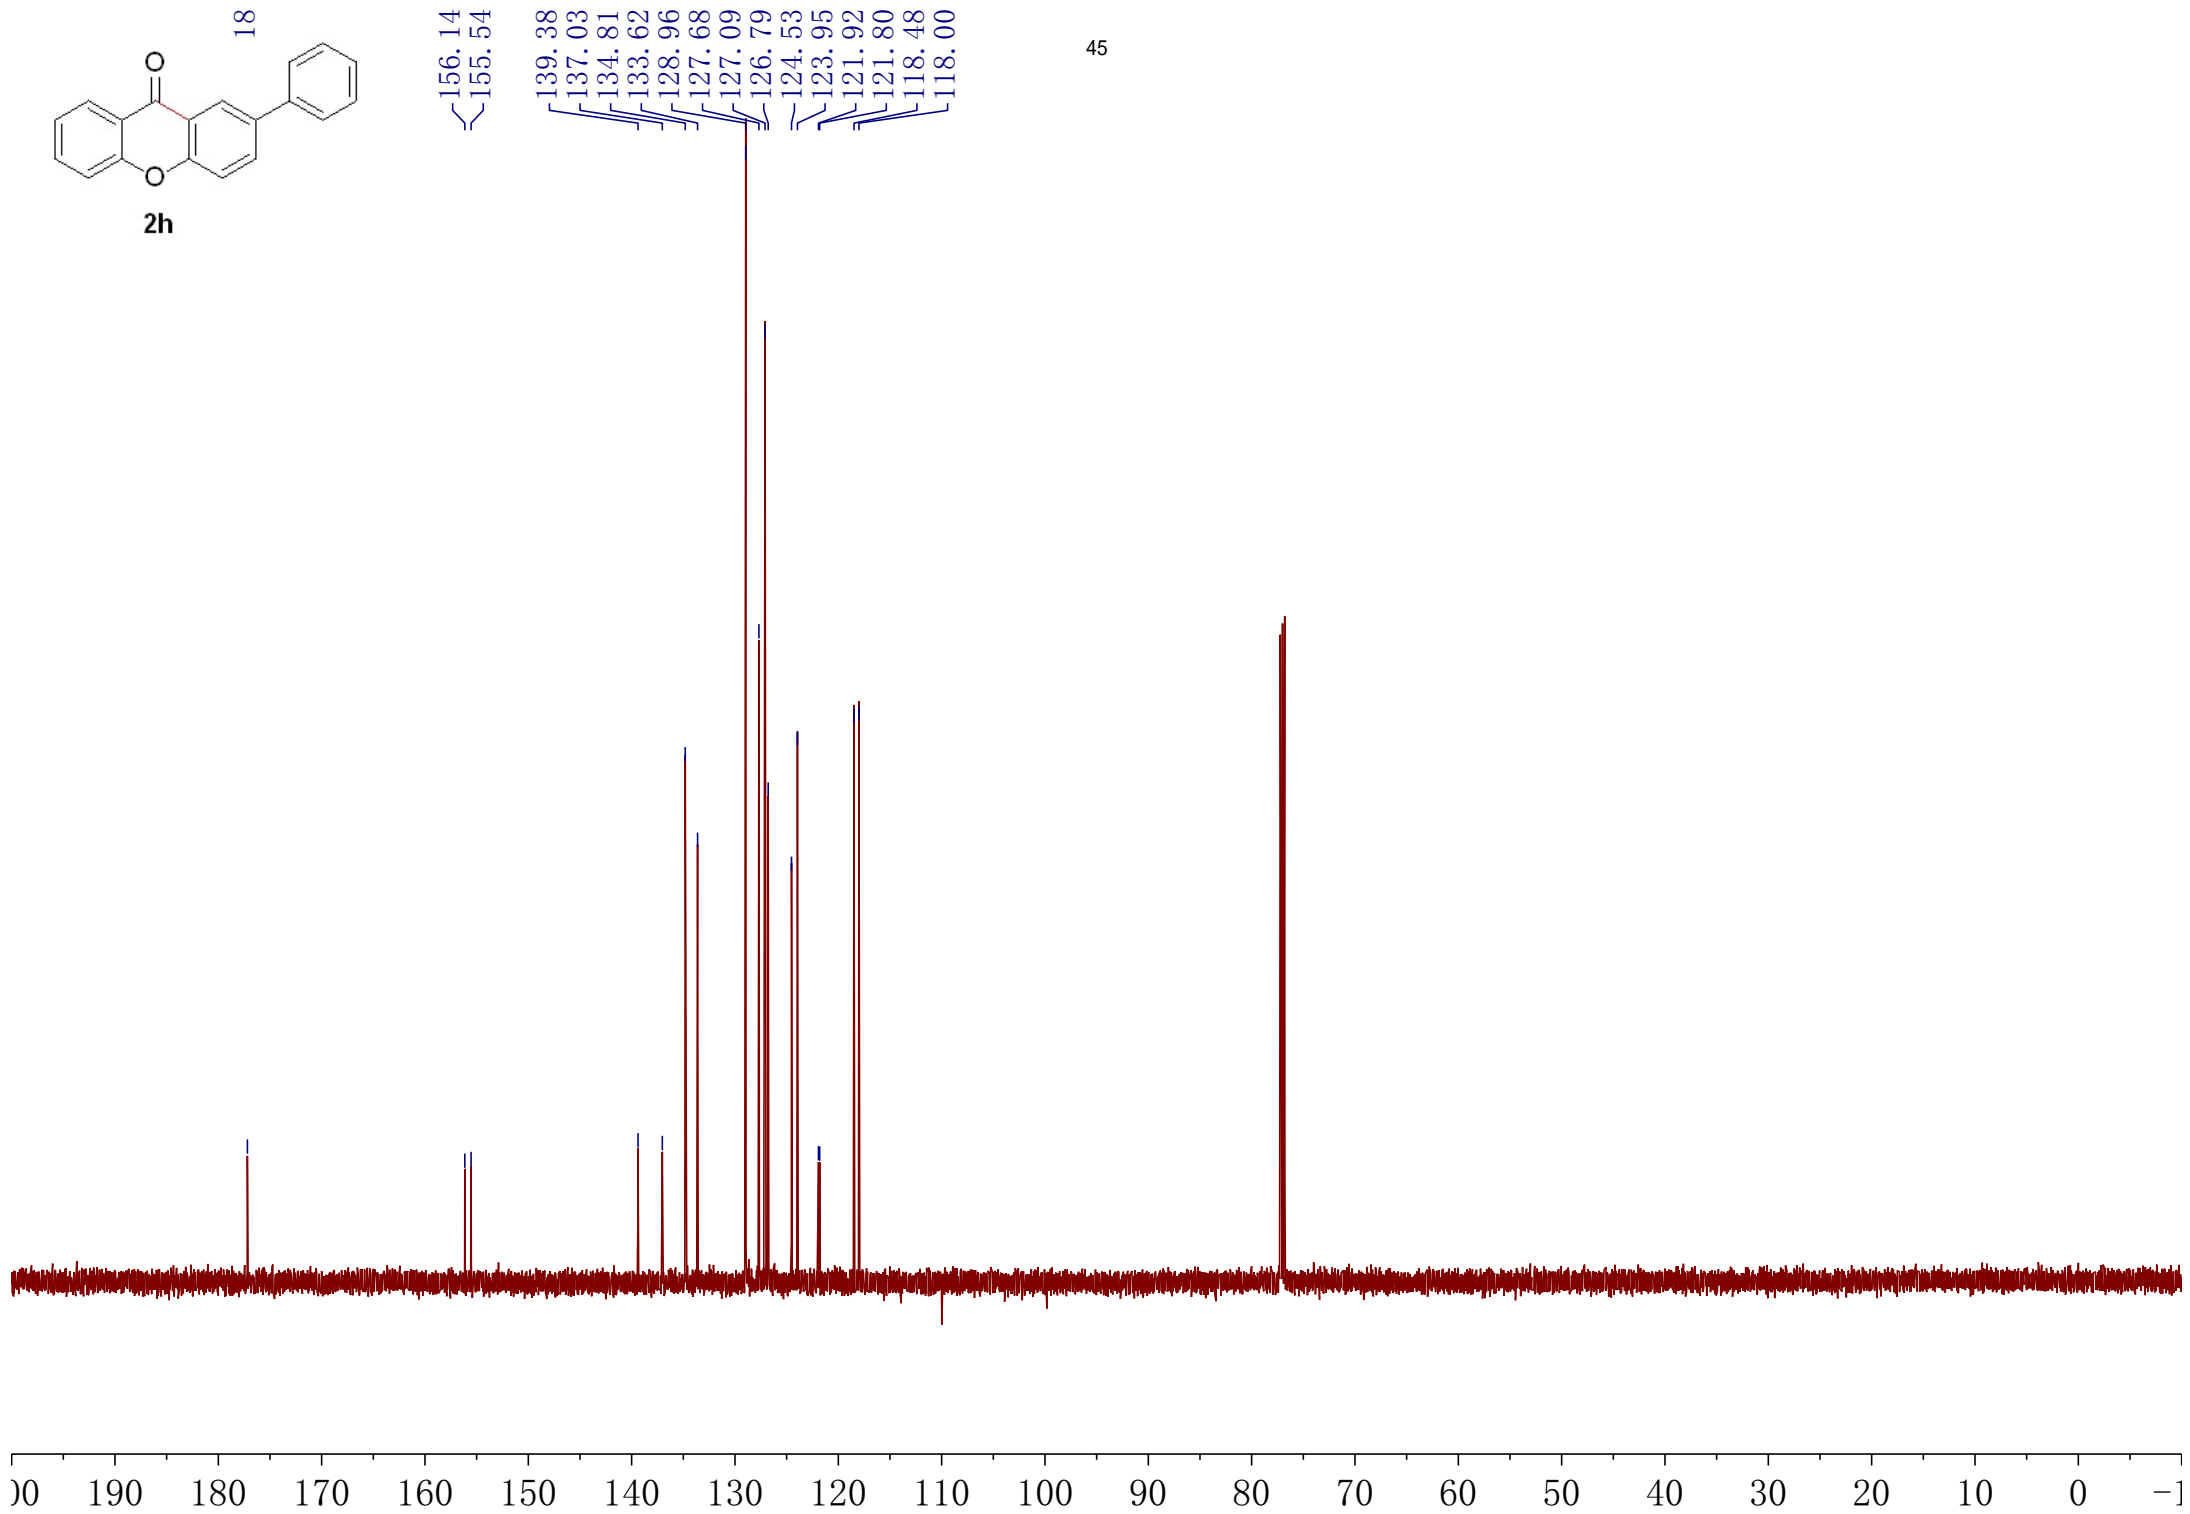

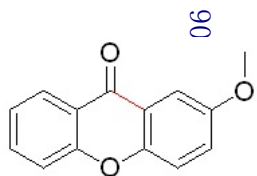

2i

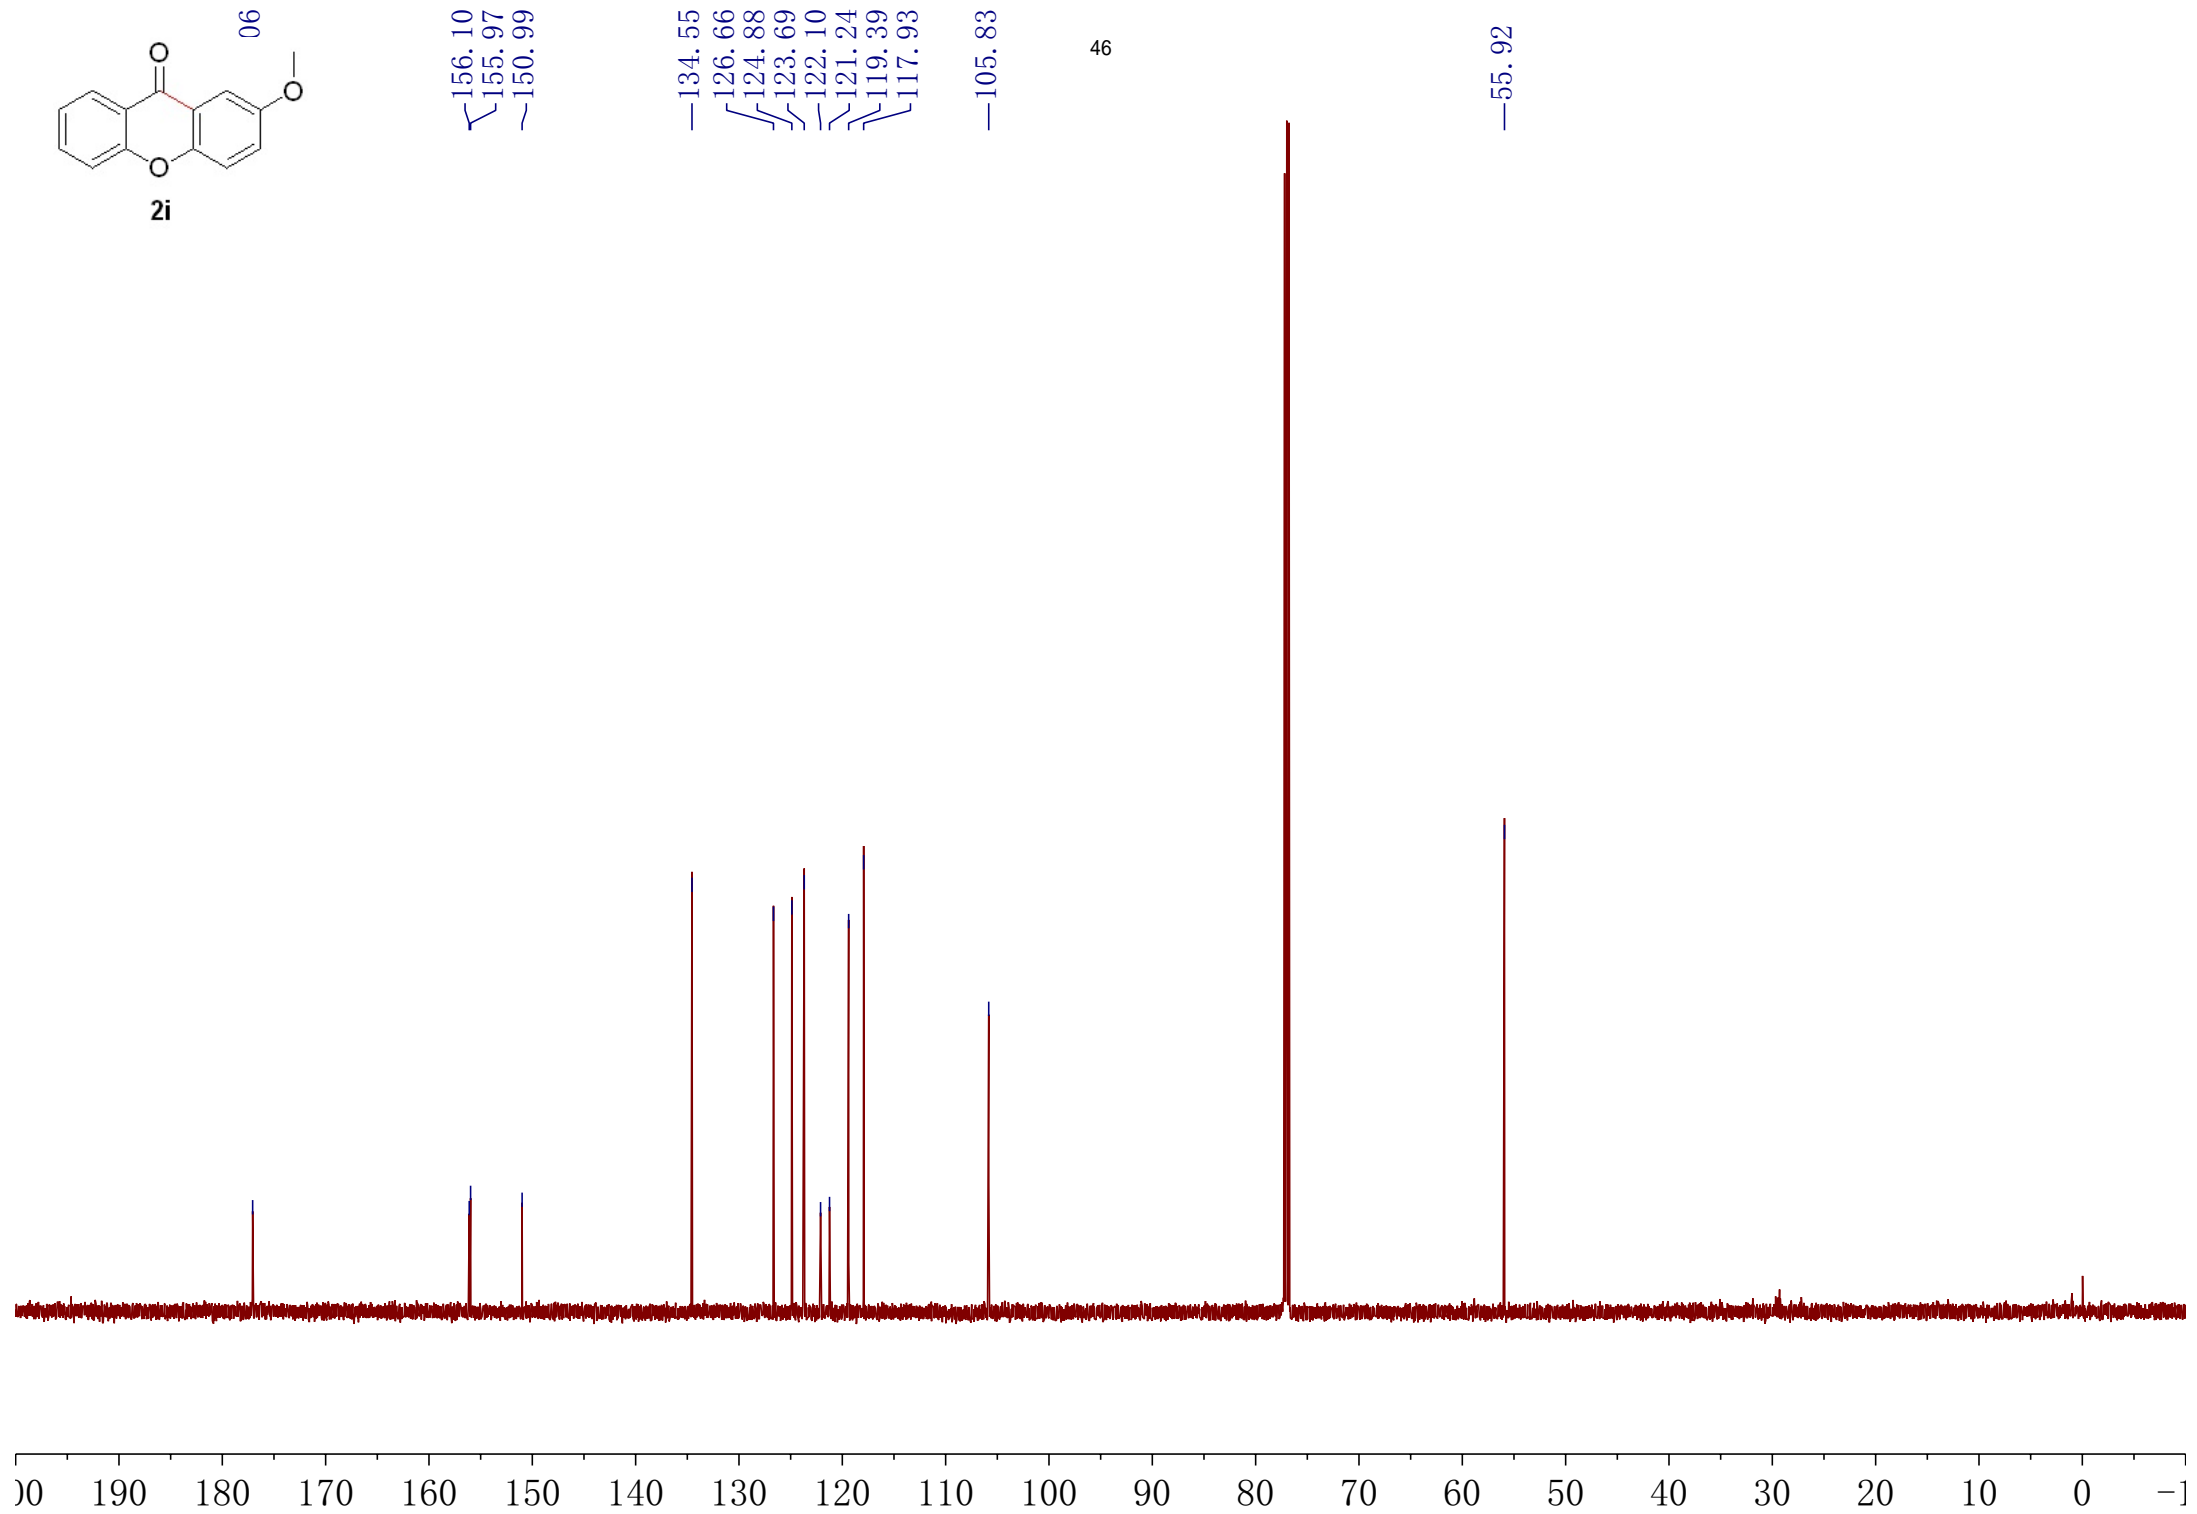

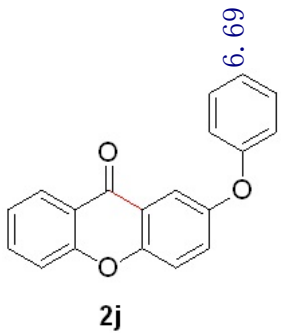

156.85  
156.10  
153.56  
152.10  
134.80  
132.93  
129.98  
126.75  
126.69  
123.89  
123.84  
122.54  
121.21  
120.58  
119.67  
118.99  
117.94  
114.14

47



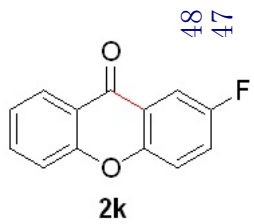

- 159.50
- 157.87
- 156.09
- 152.34
- 152.32
- 135.05
- 126.66
- 124.11
- 122.98
- 122.81
- 120.99
- 119.98
- 119.93
- 117.96
- 111.47
- 111.31

48

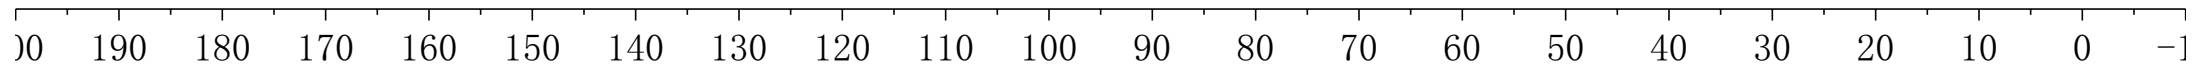



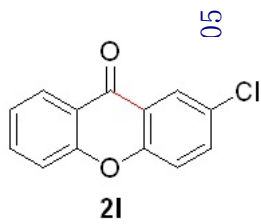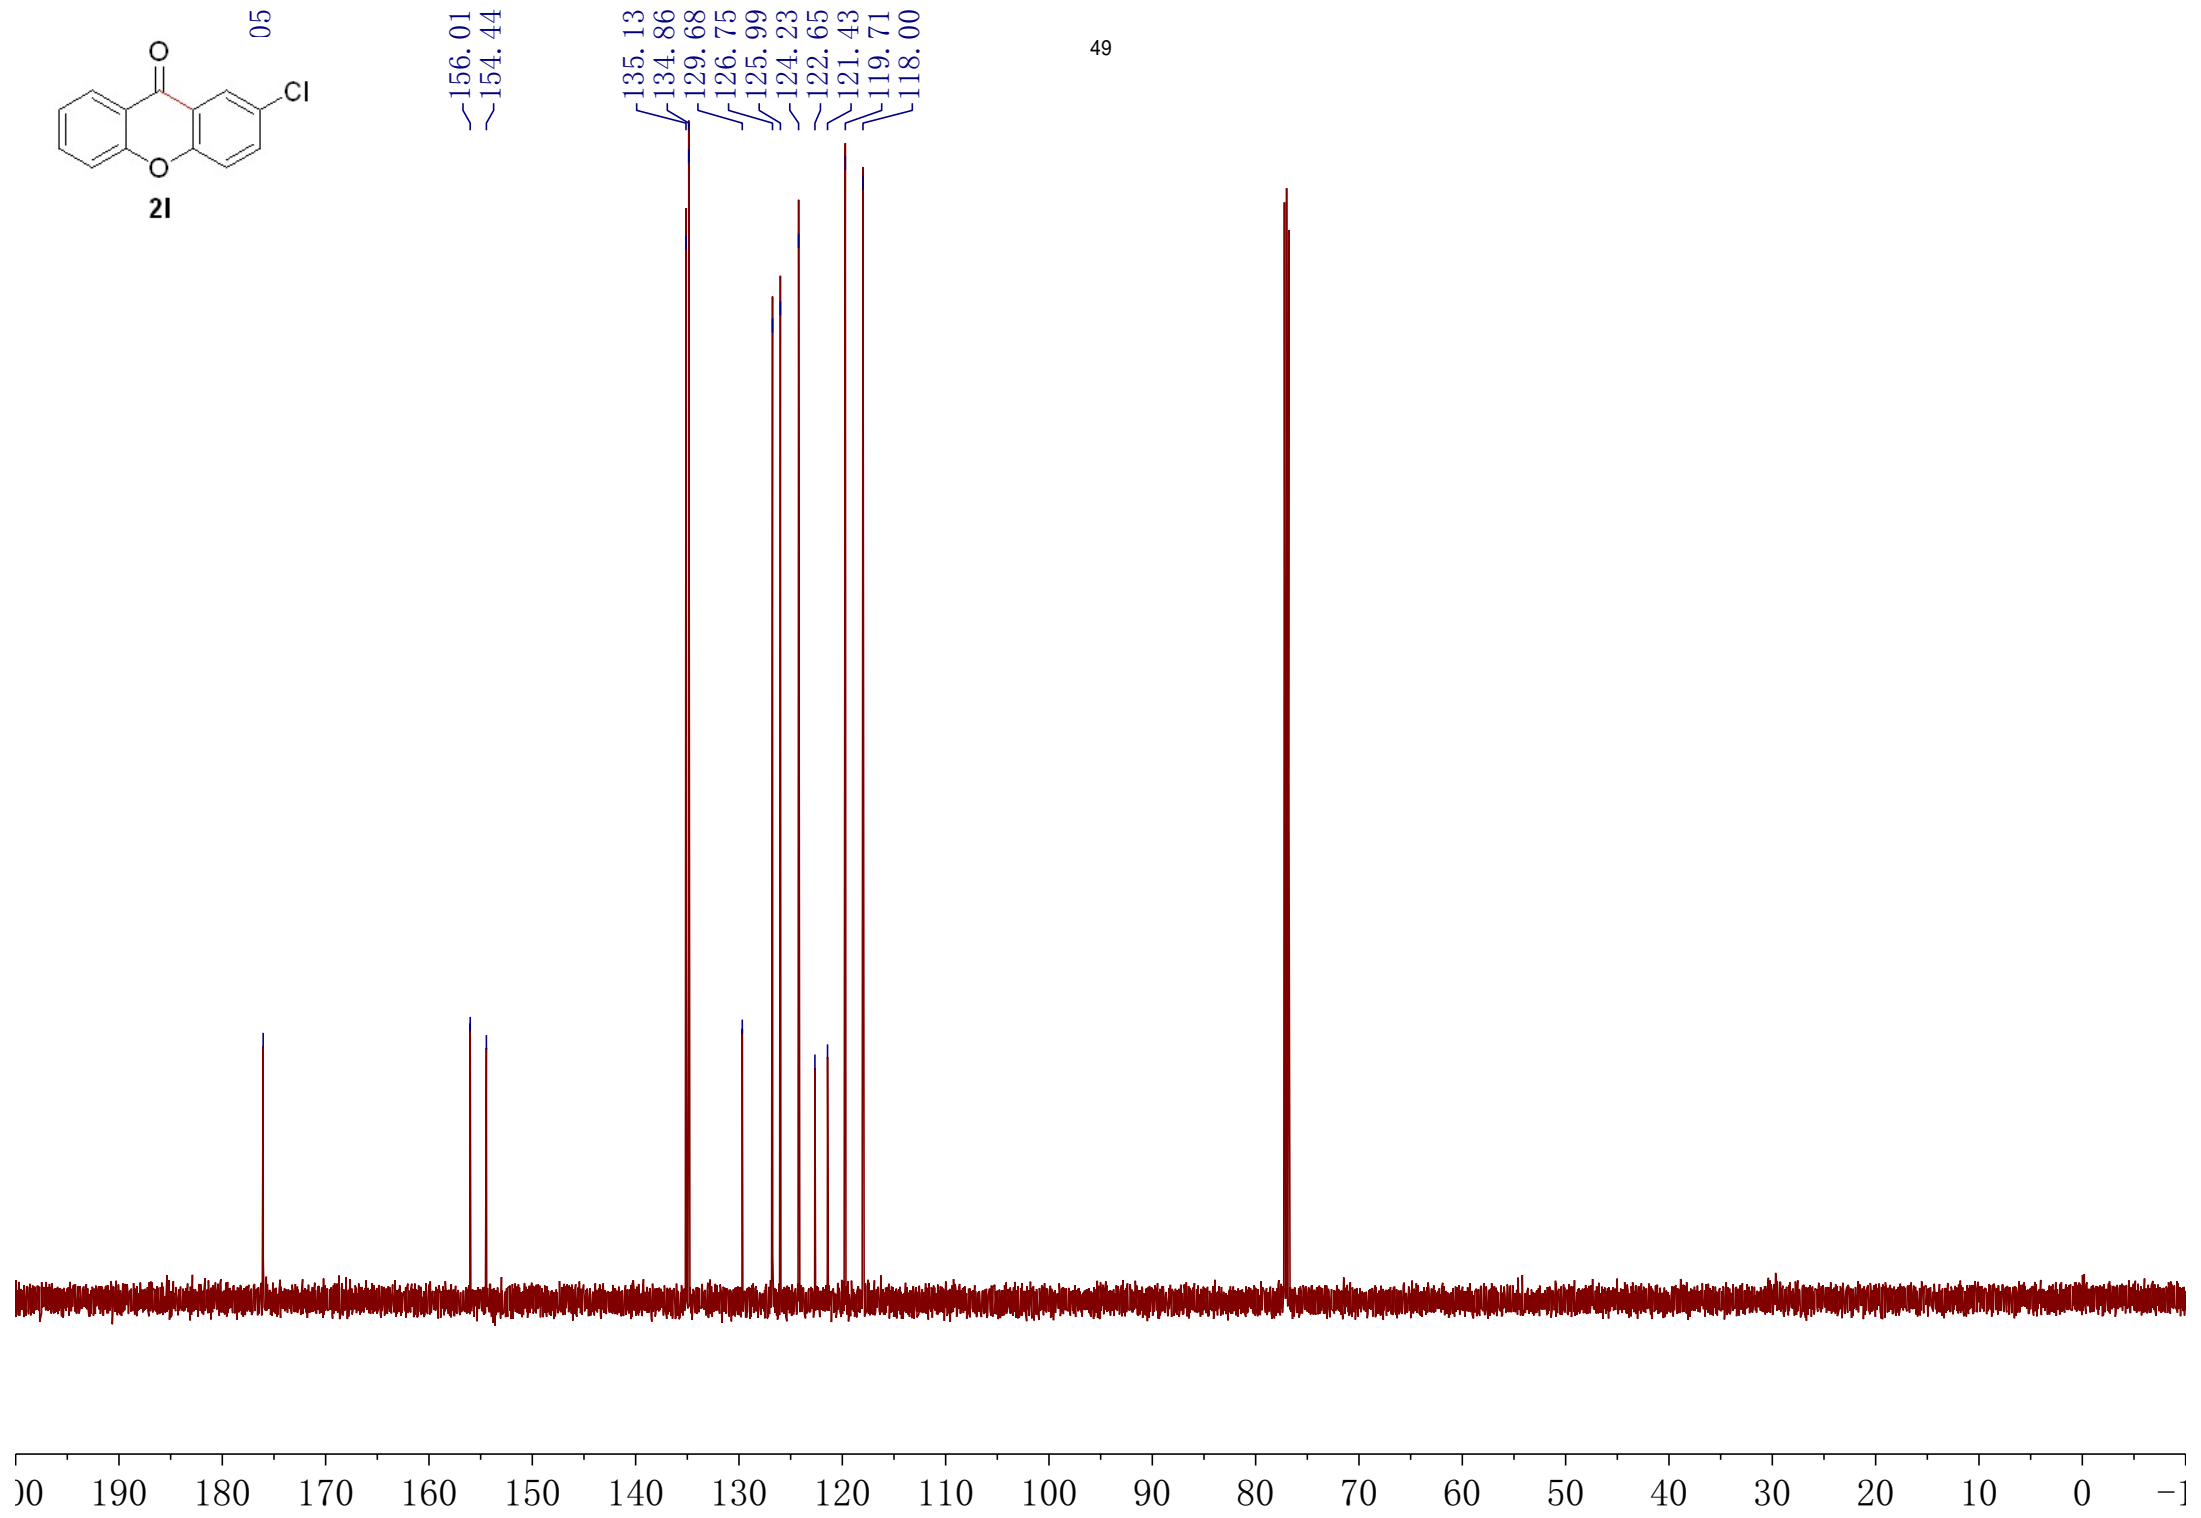

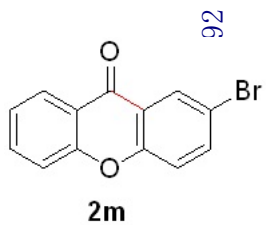

155.99  
154.89  
137.62  
135.15  
129.20  
126.79  
124.26  
123.08  
121.49  
119.97  
118.02  
117.02

50

190 180 170 160 150 140 130 120 110 100 90 80 70 60 50 40 30 20 10 0 -1

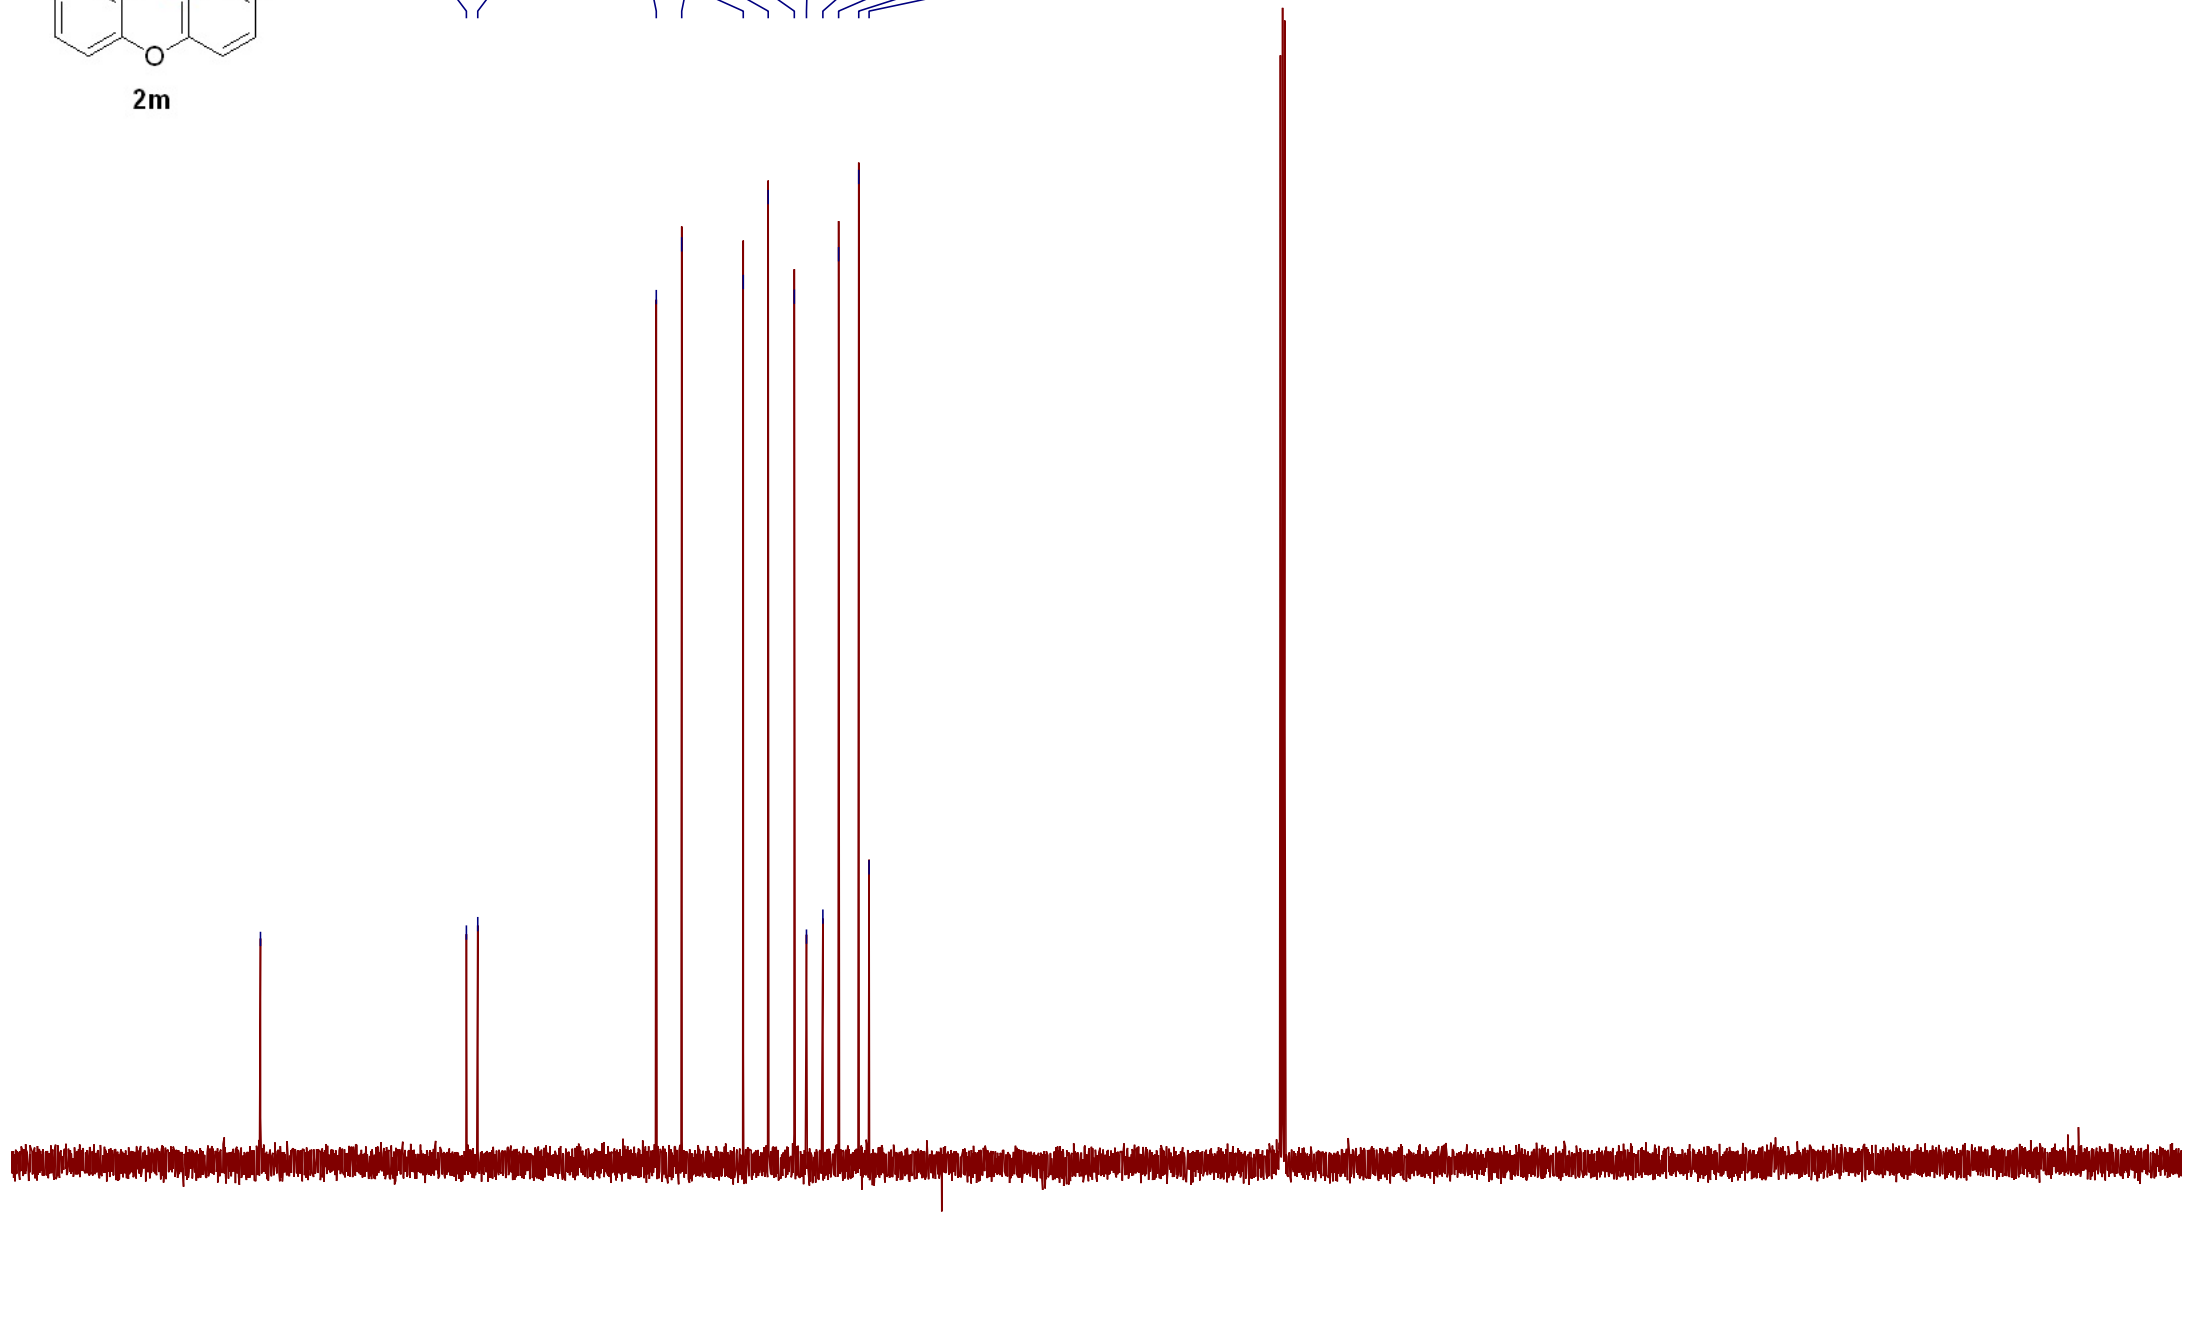

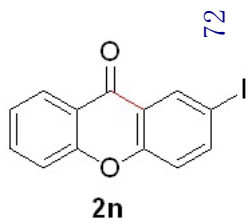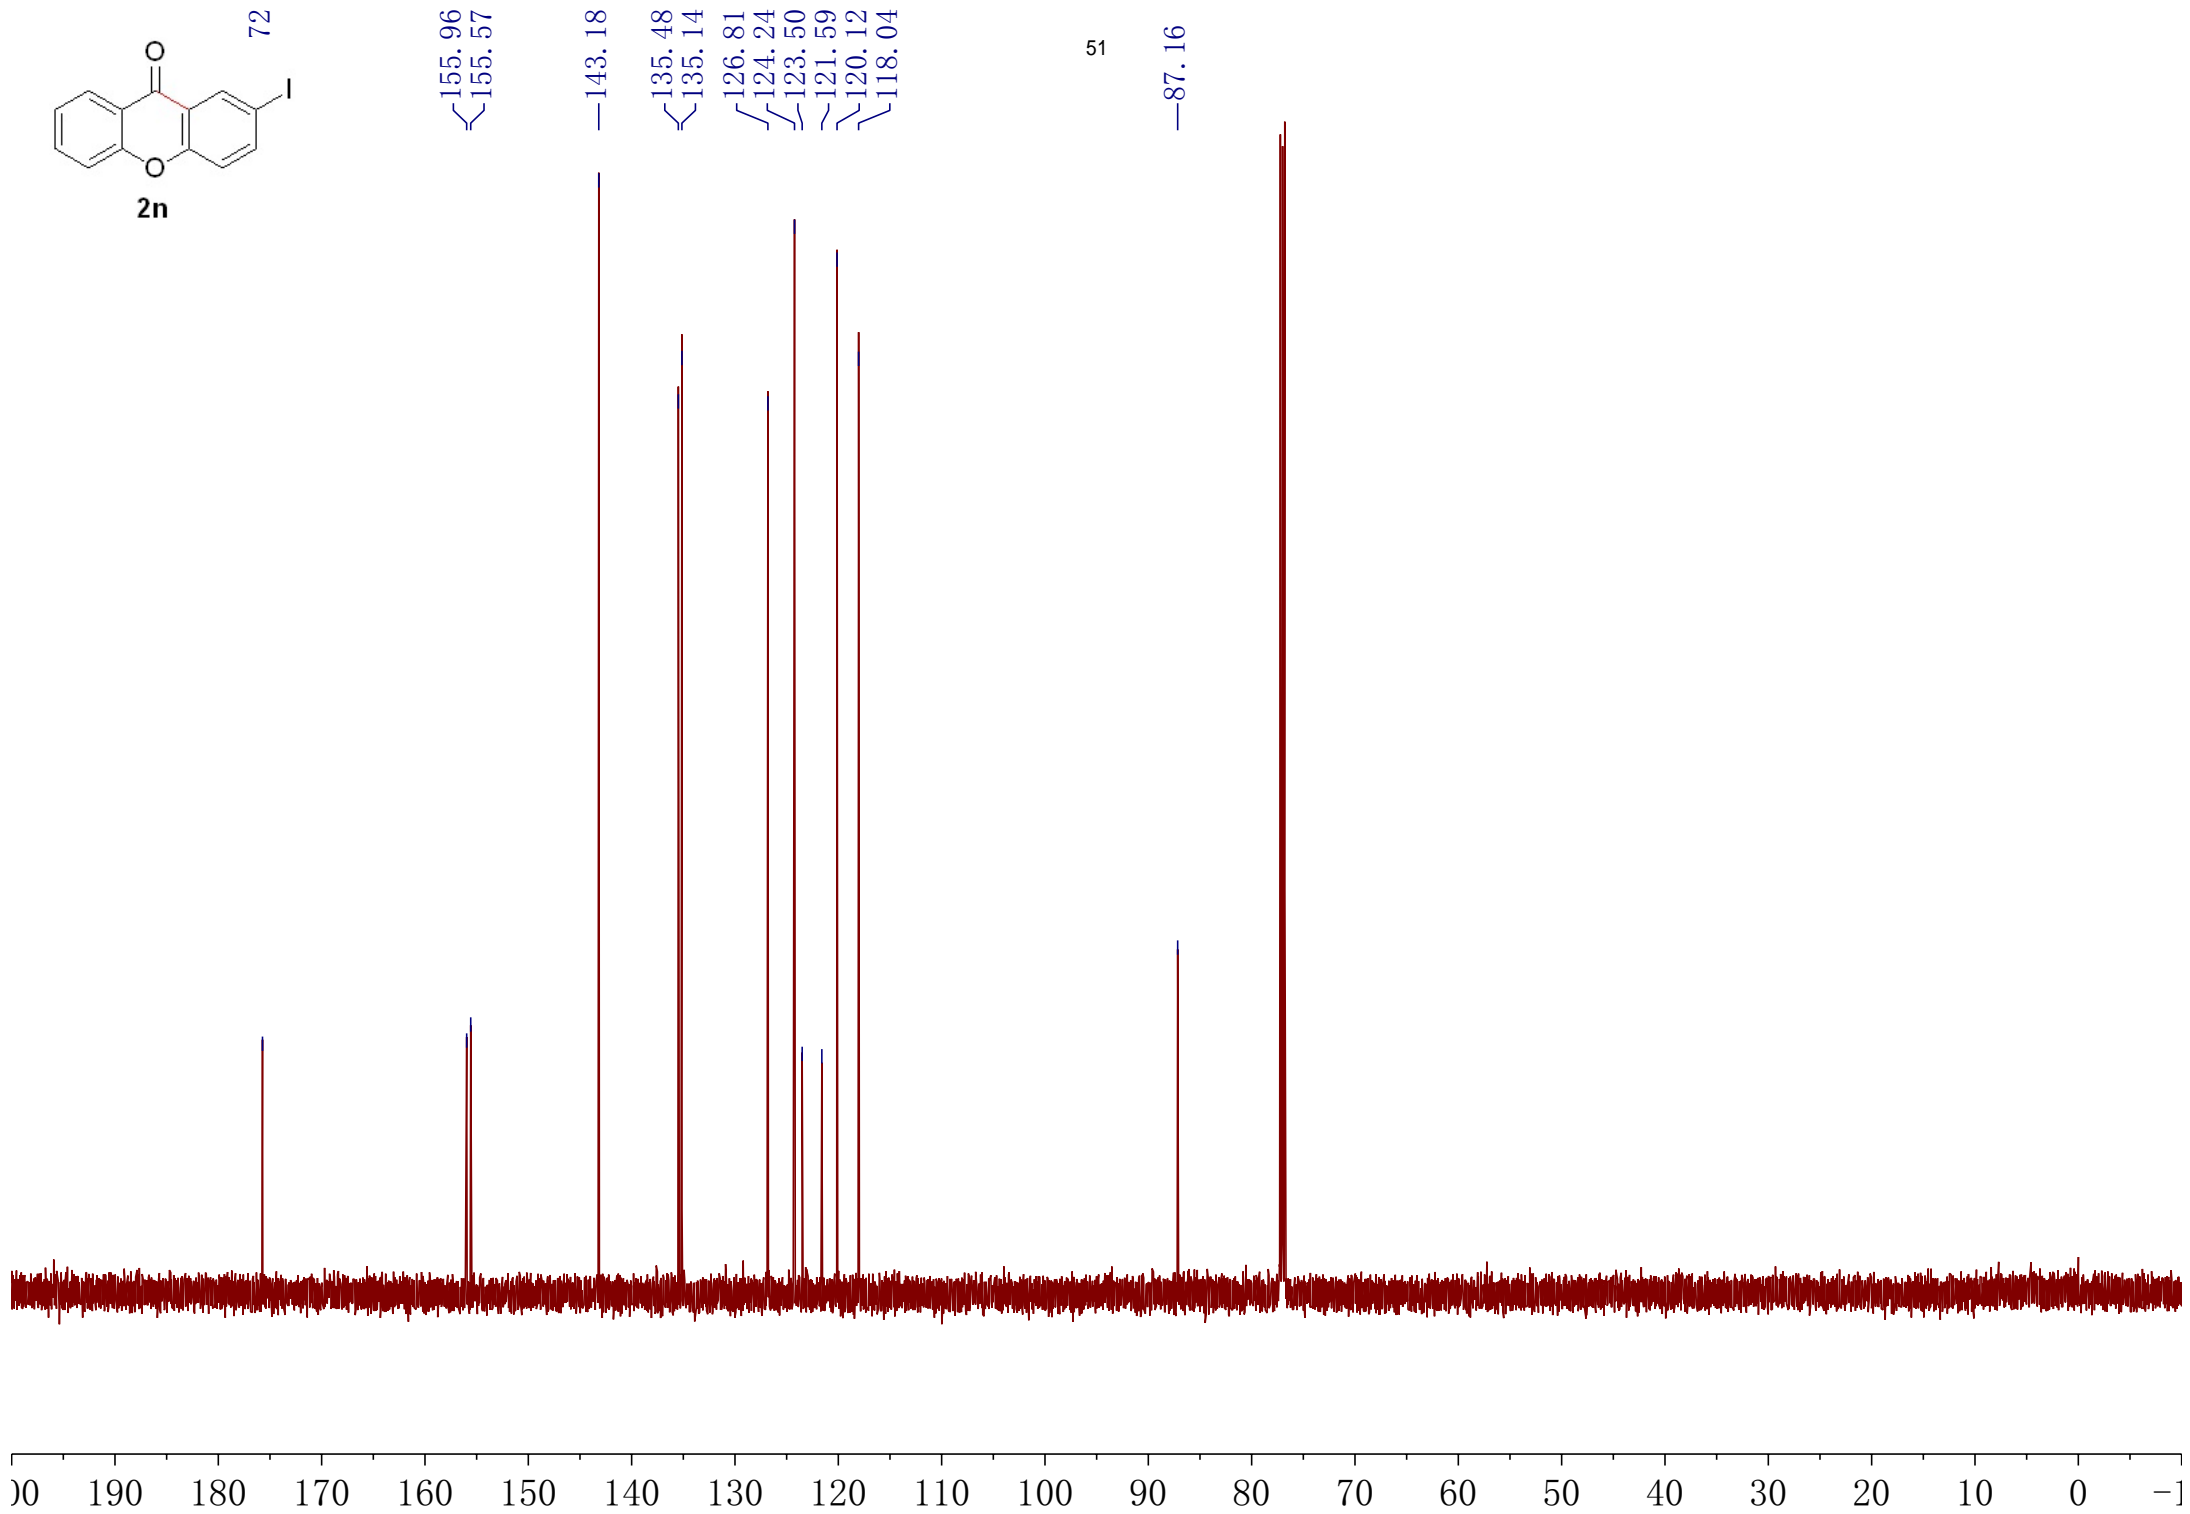



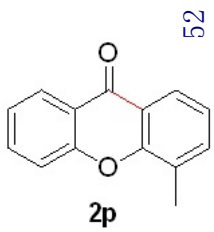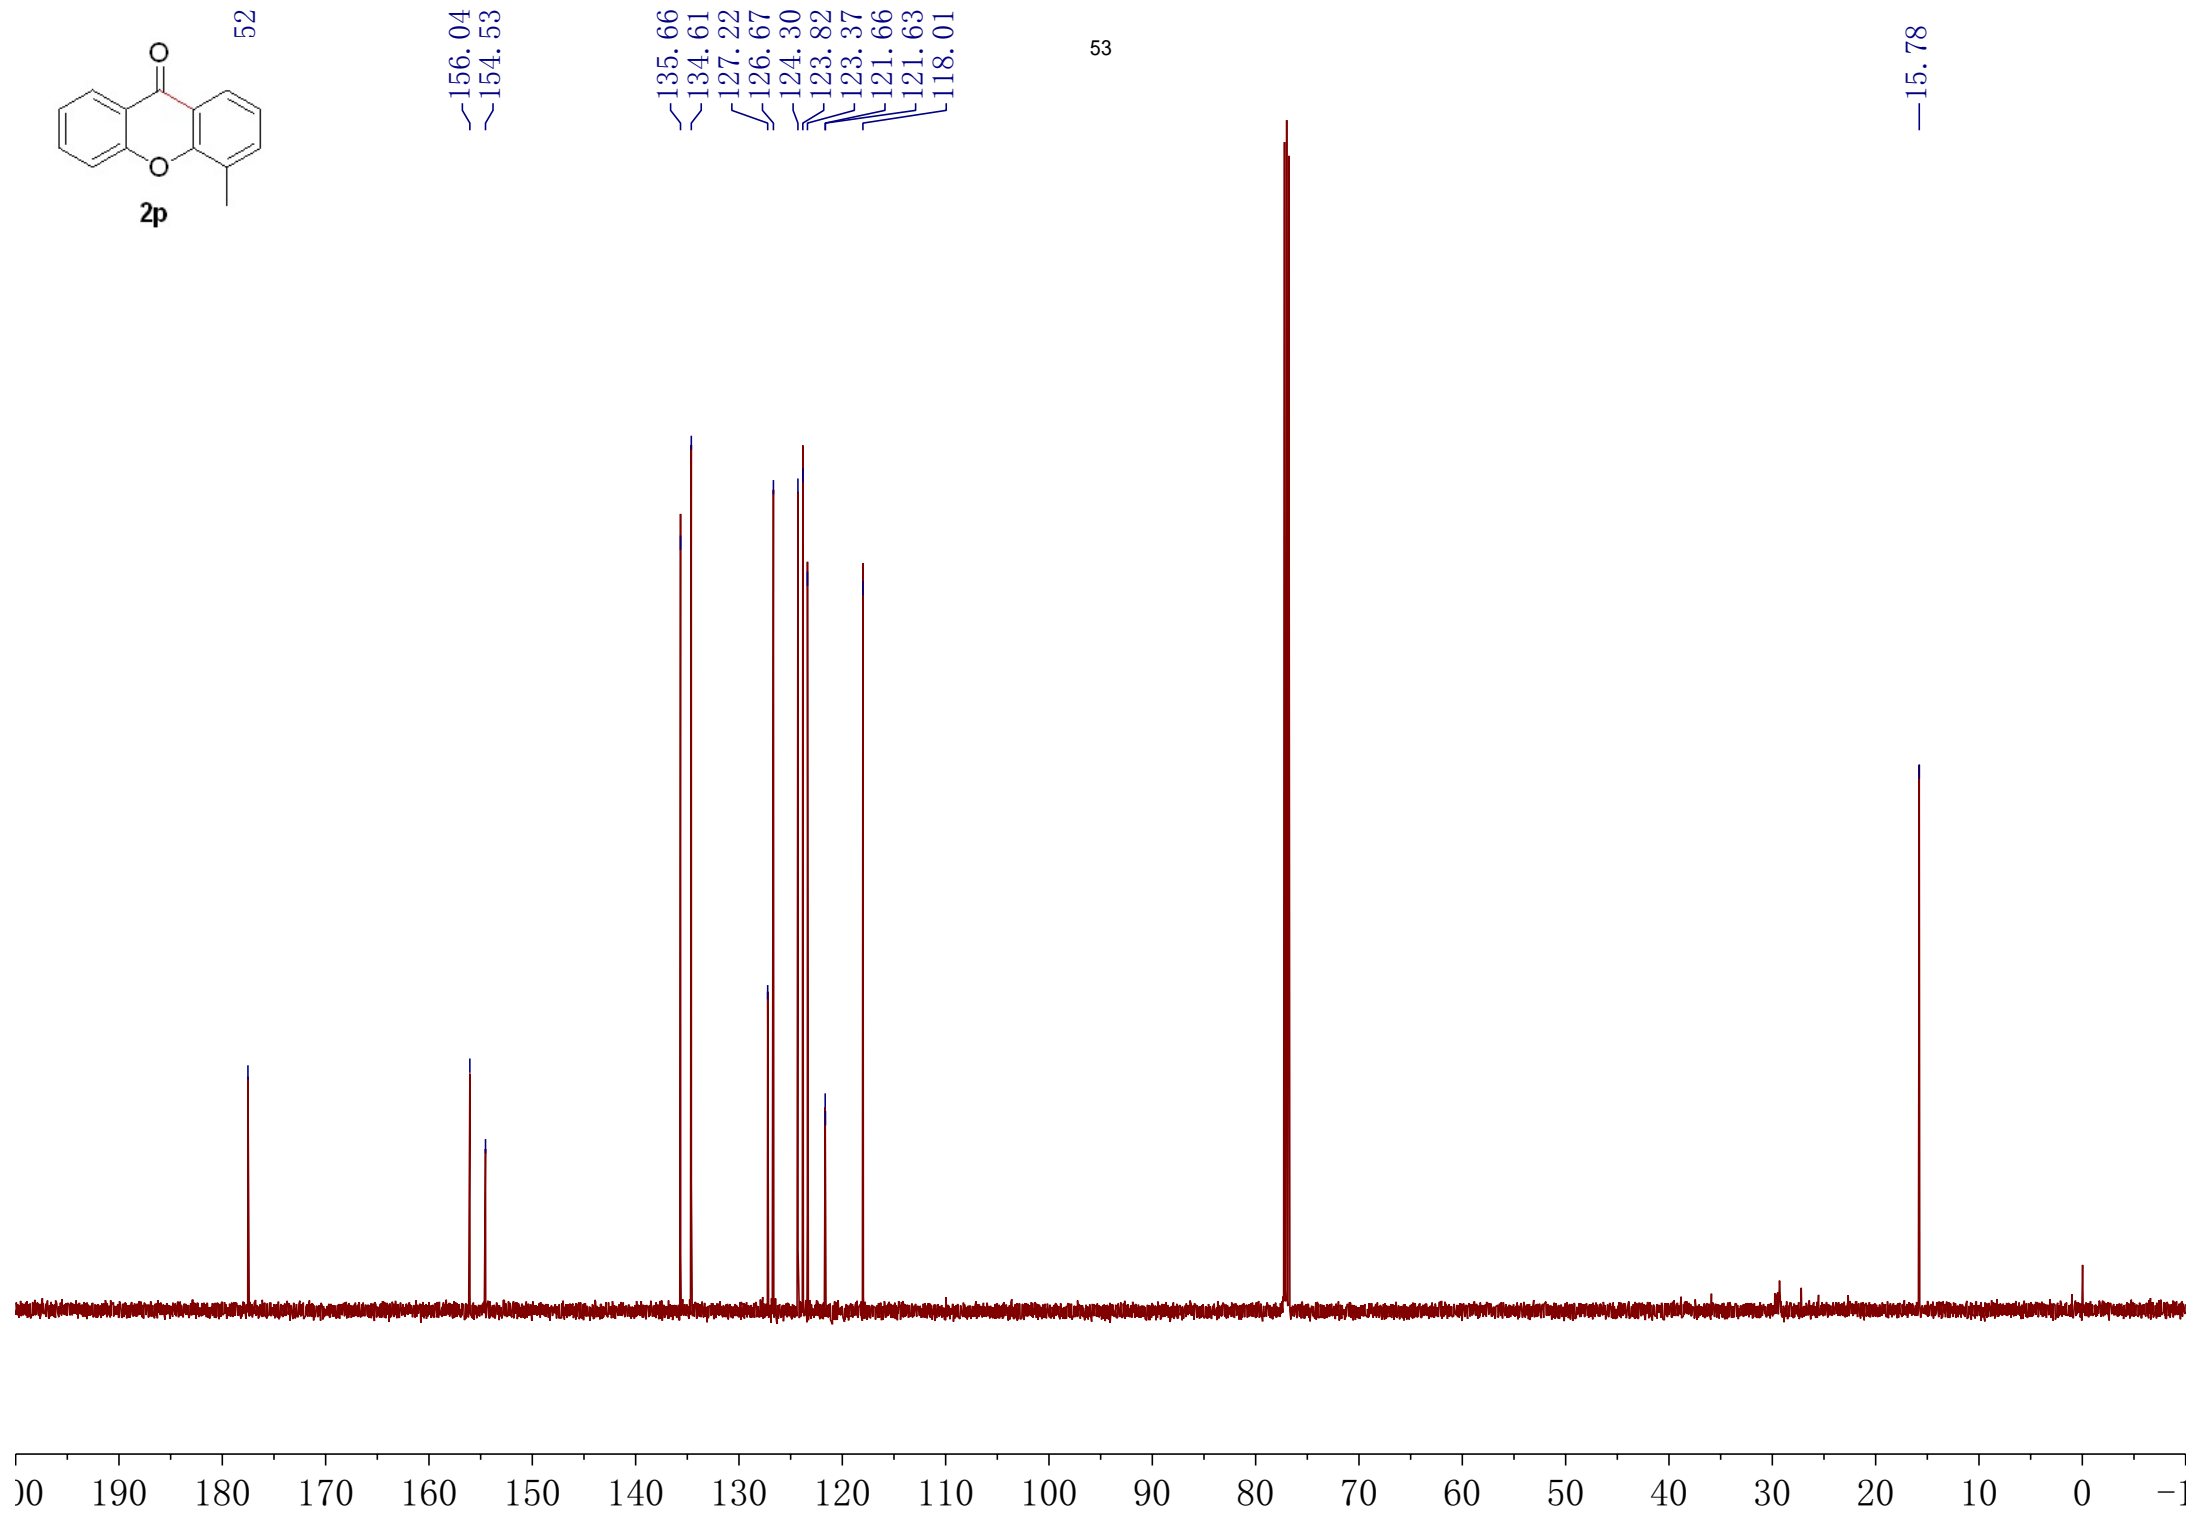

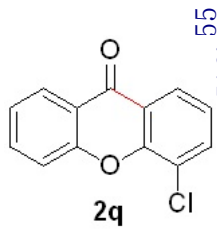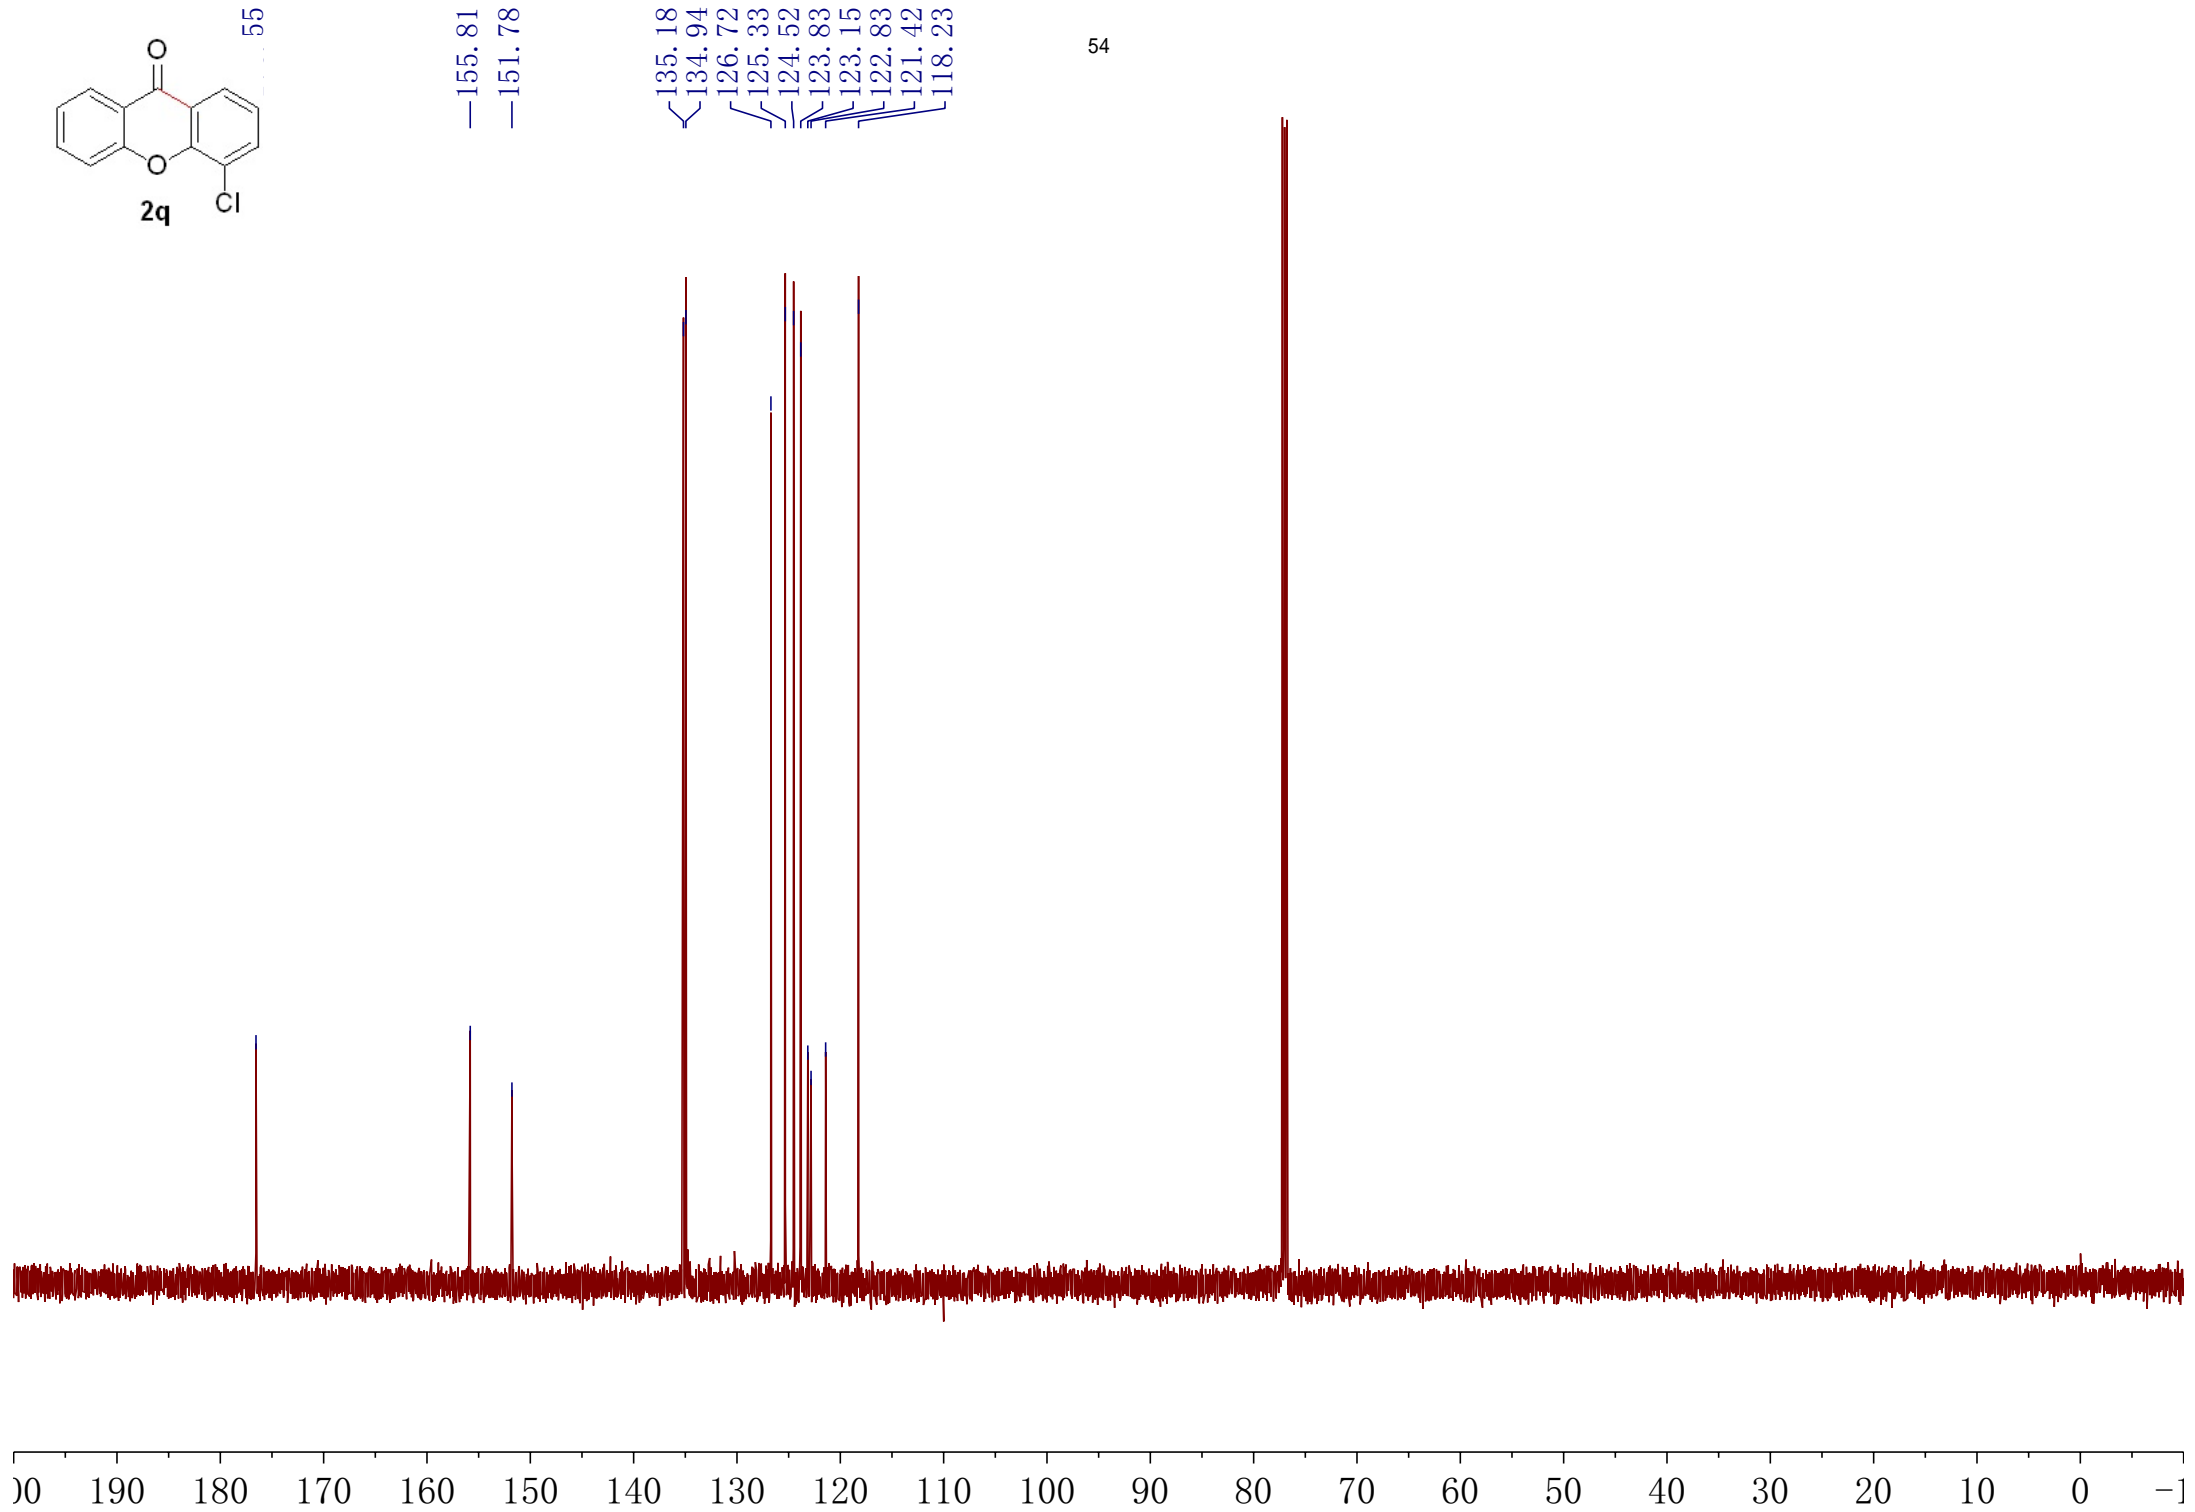

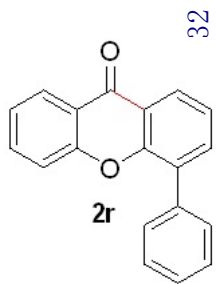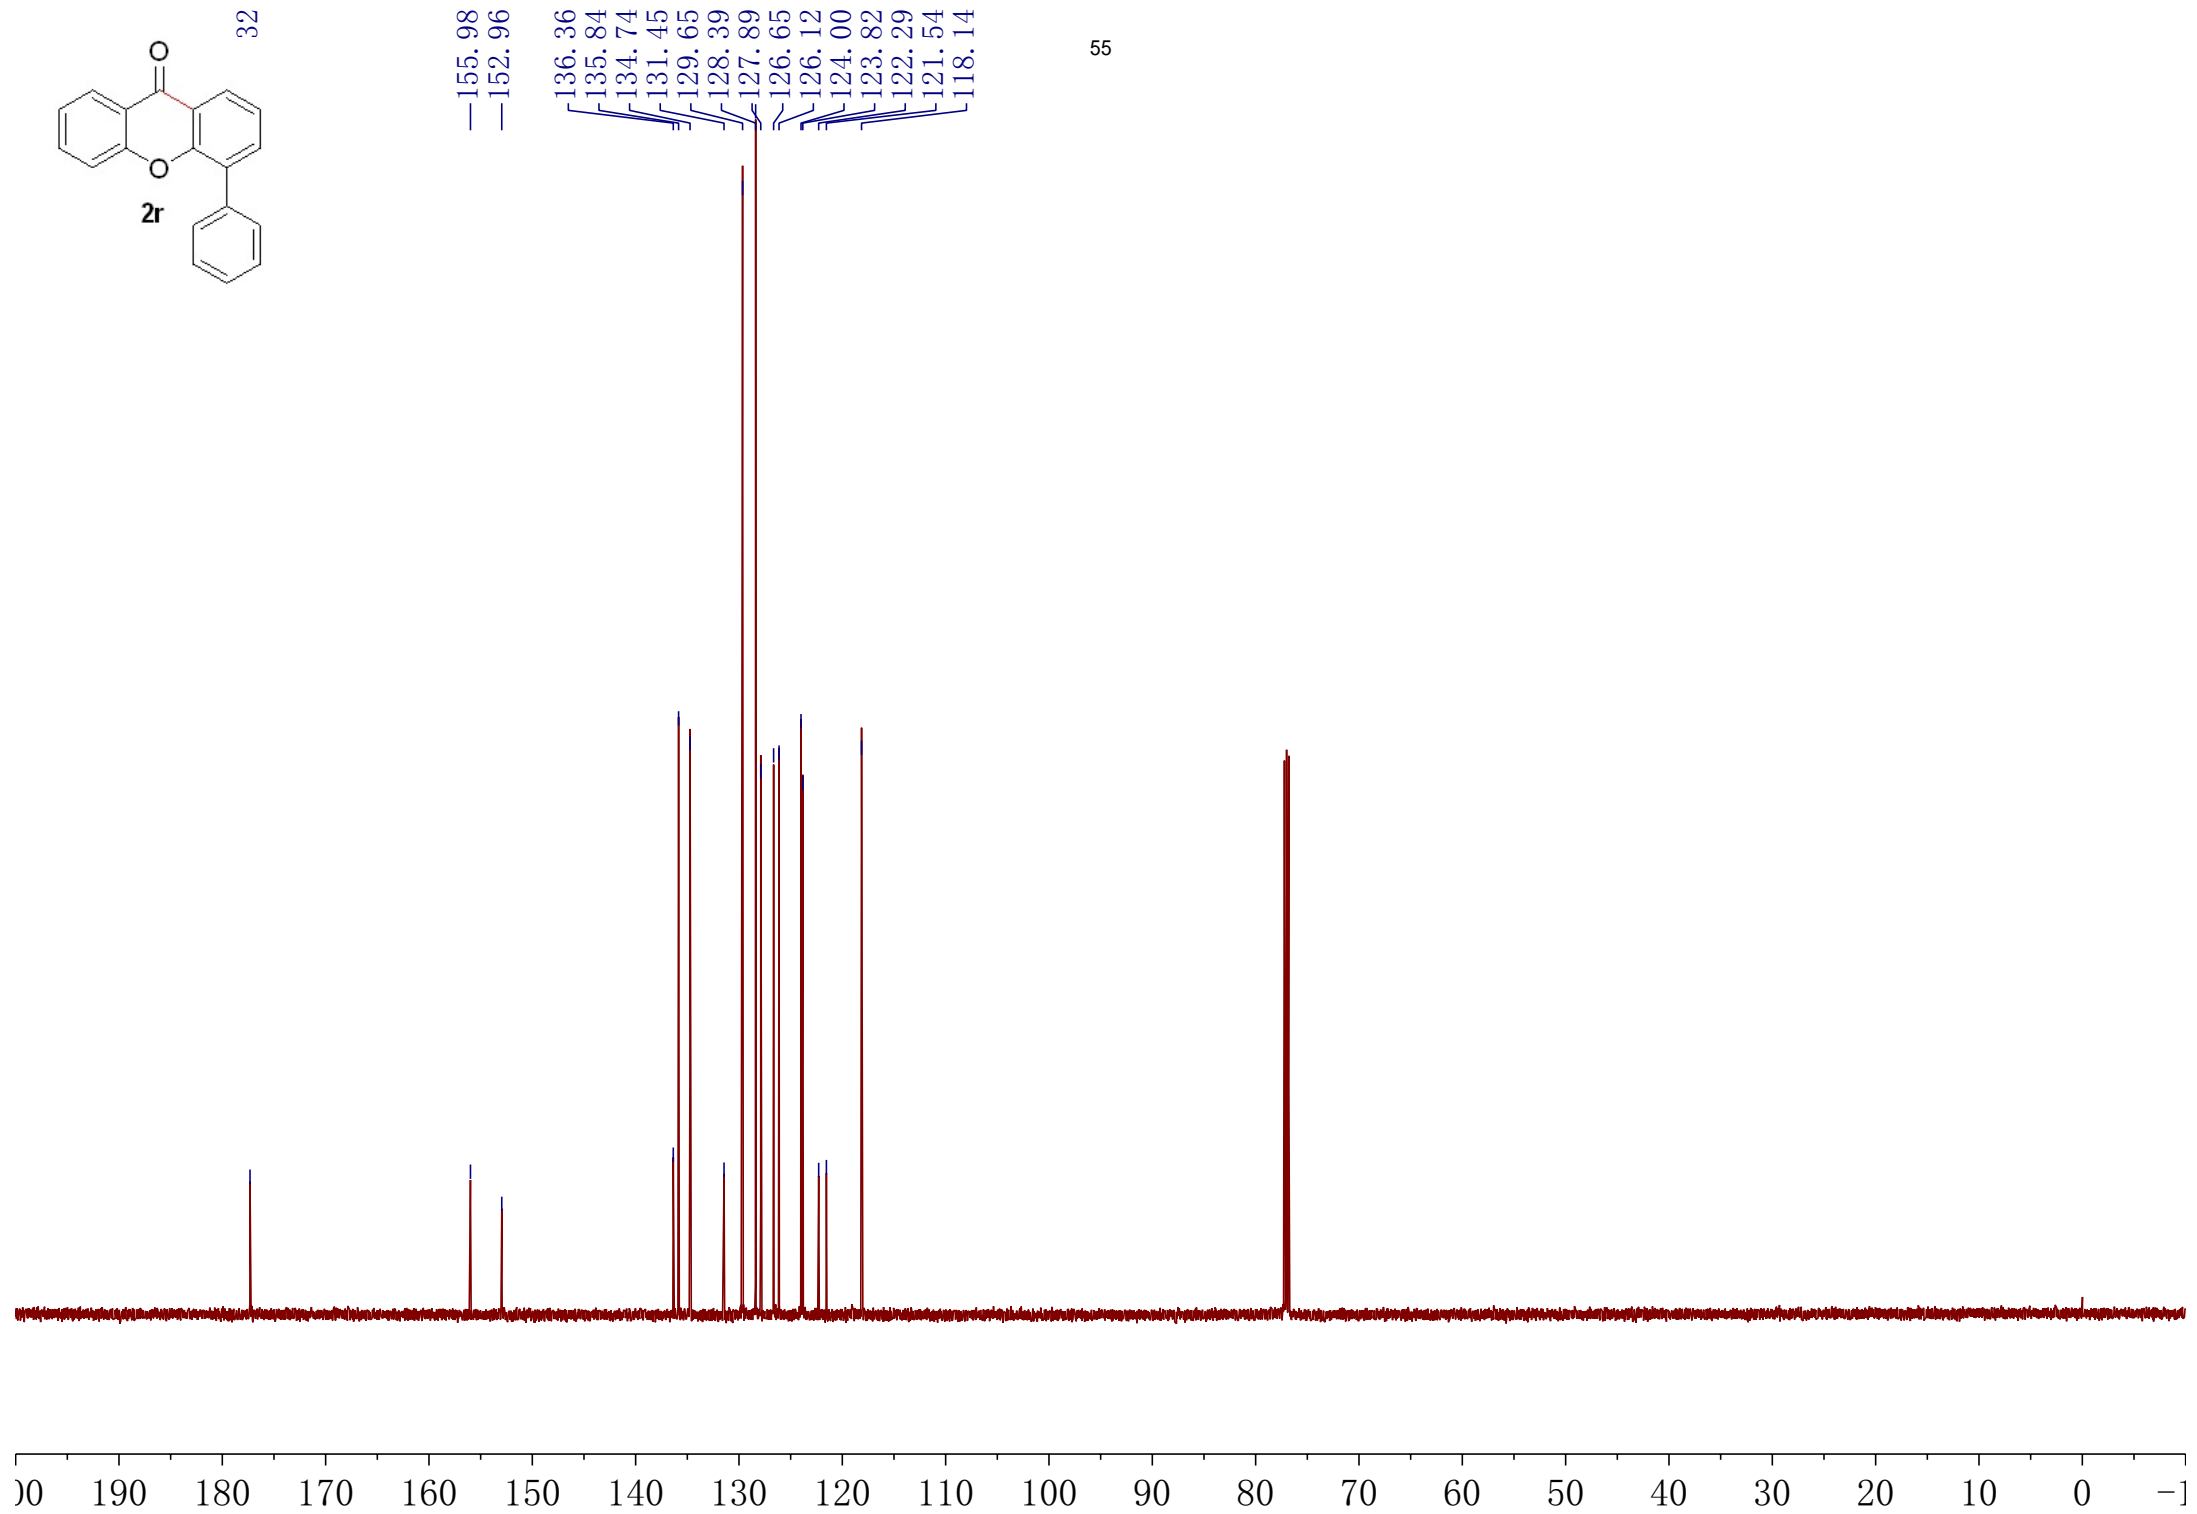

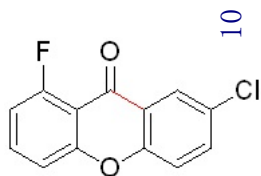

2s

10

162.35  
160.59  
156.89  
153.68

135.14  
135.06  
135.02  
130.11  
125.98  
123.11  
119.39  
113.88  
113.85  
112.07  
112.01  
111.27  
111.13

56





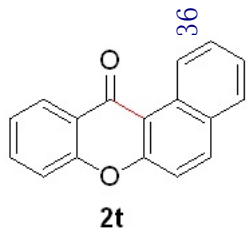

— 157.50  
— 154.57  
136.55  
133.83  
131.07  
130.05  
129.46  
128.29  
126.90  
126.59  
126.05  
124.23  
123.50  
117.96  
117.46  
114.46

57

00 190 180 170 160 150 140 130 120 110 100 90 80 70 60 50 40 30 20 10 0 -1

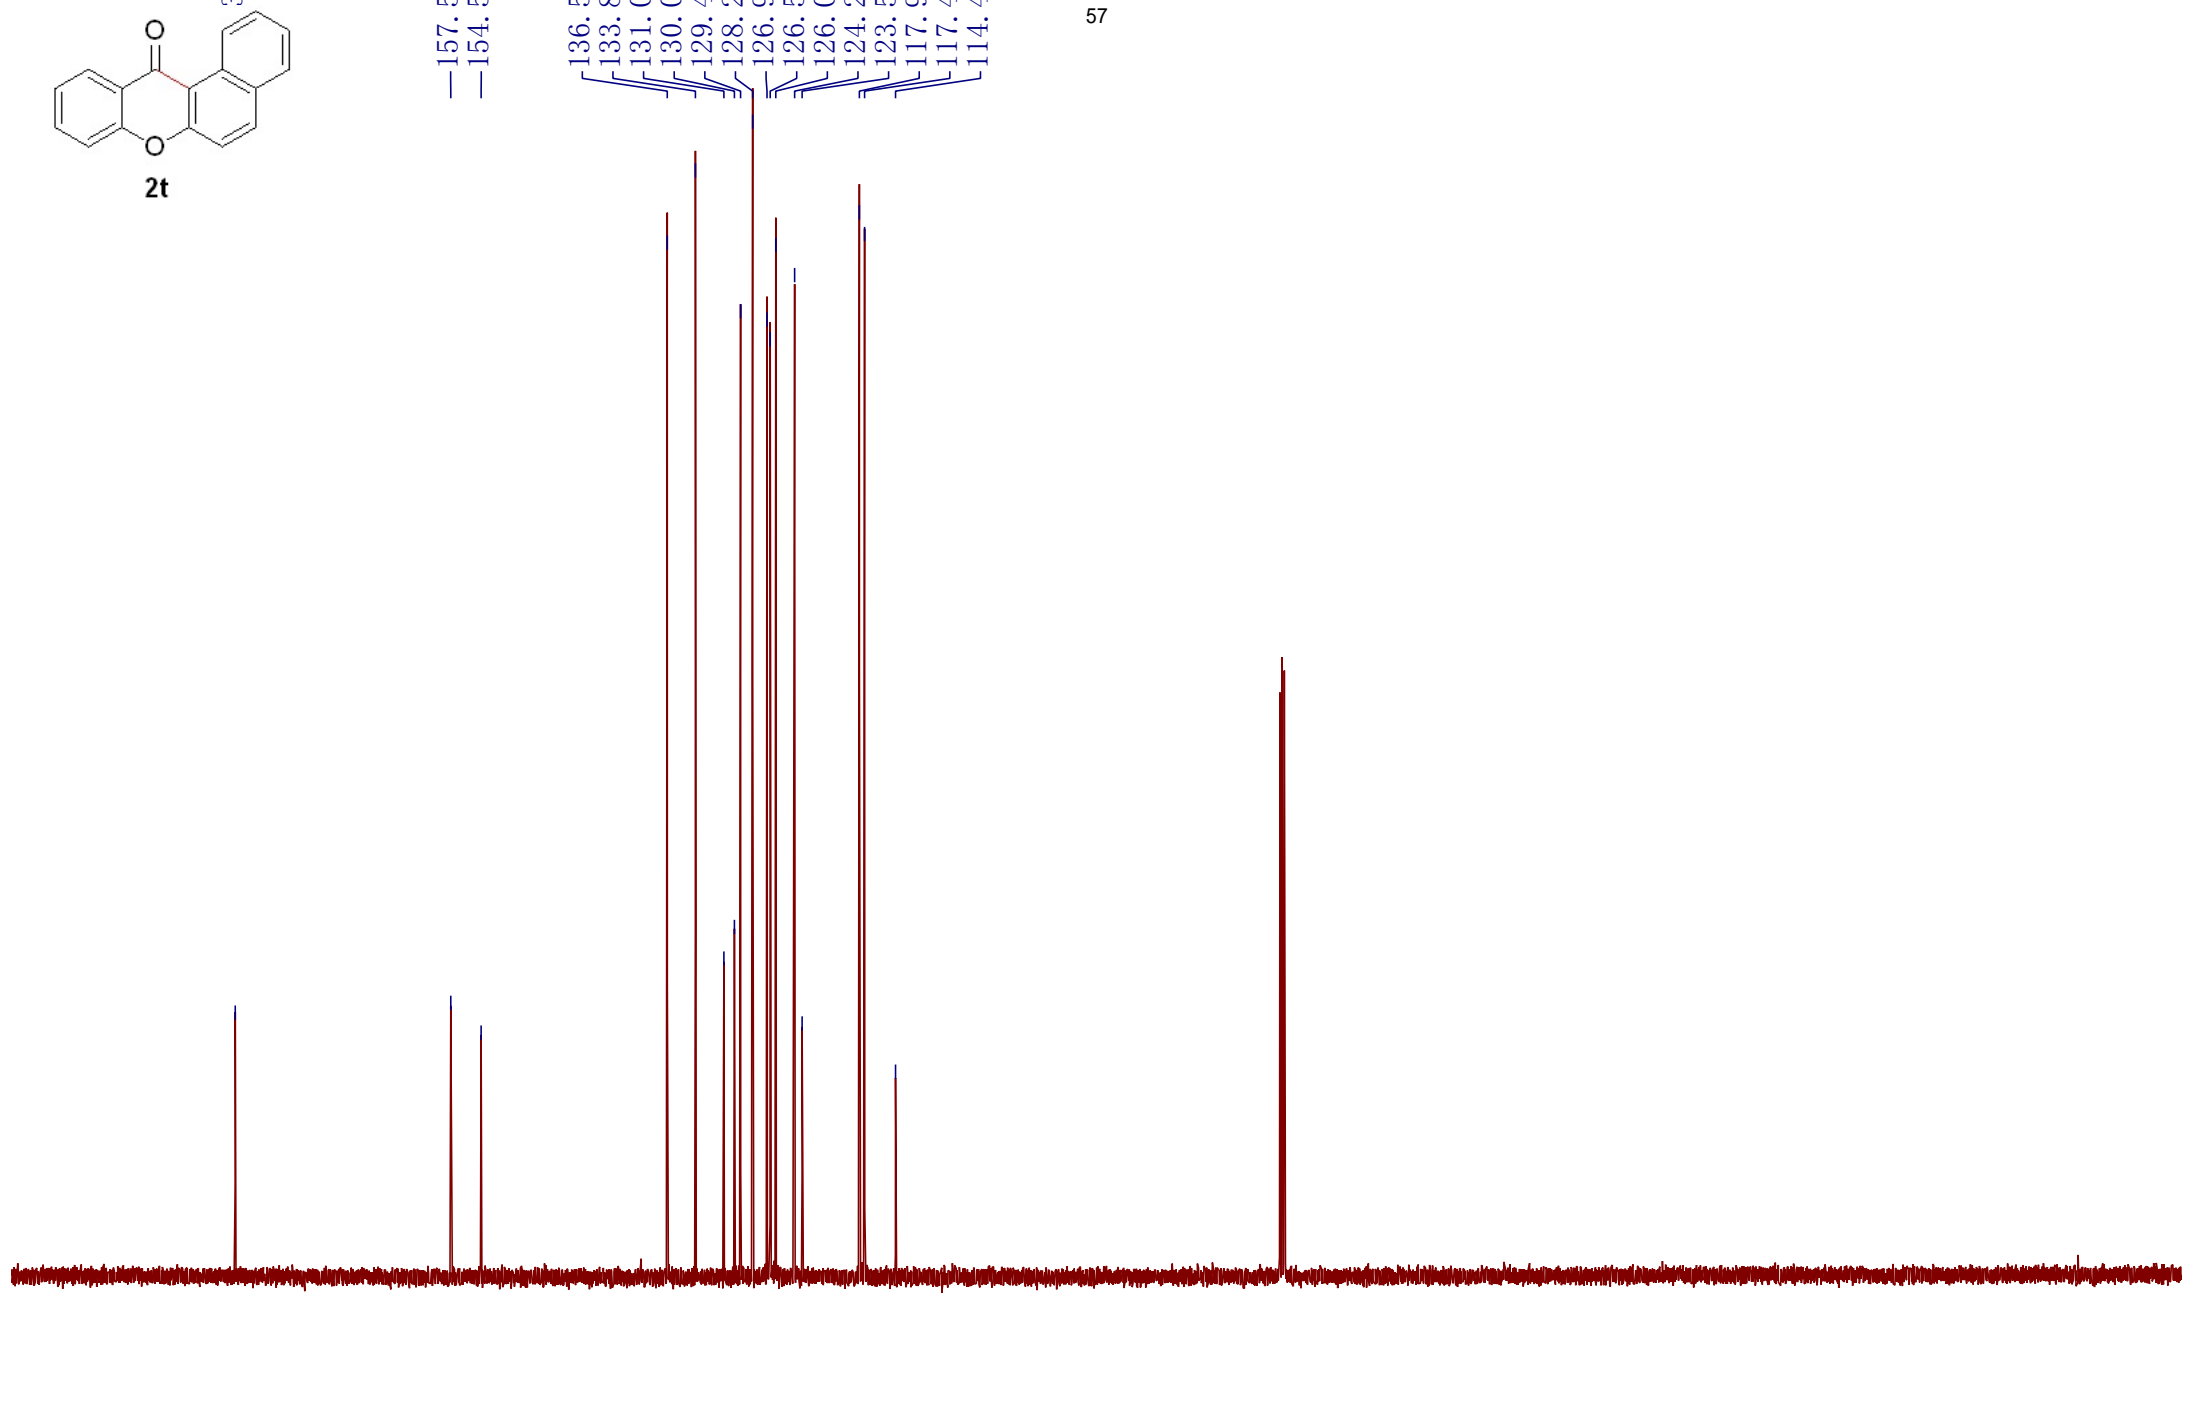

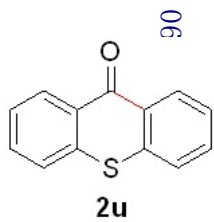

137.25  
132.22  
129.83  
129.22  
126.26  
125.95

58



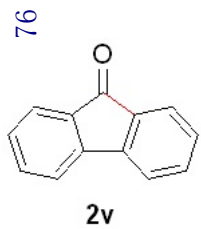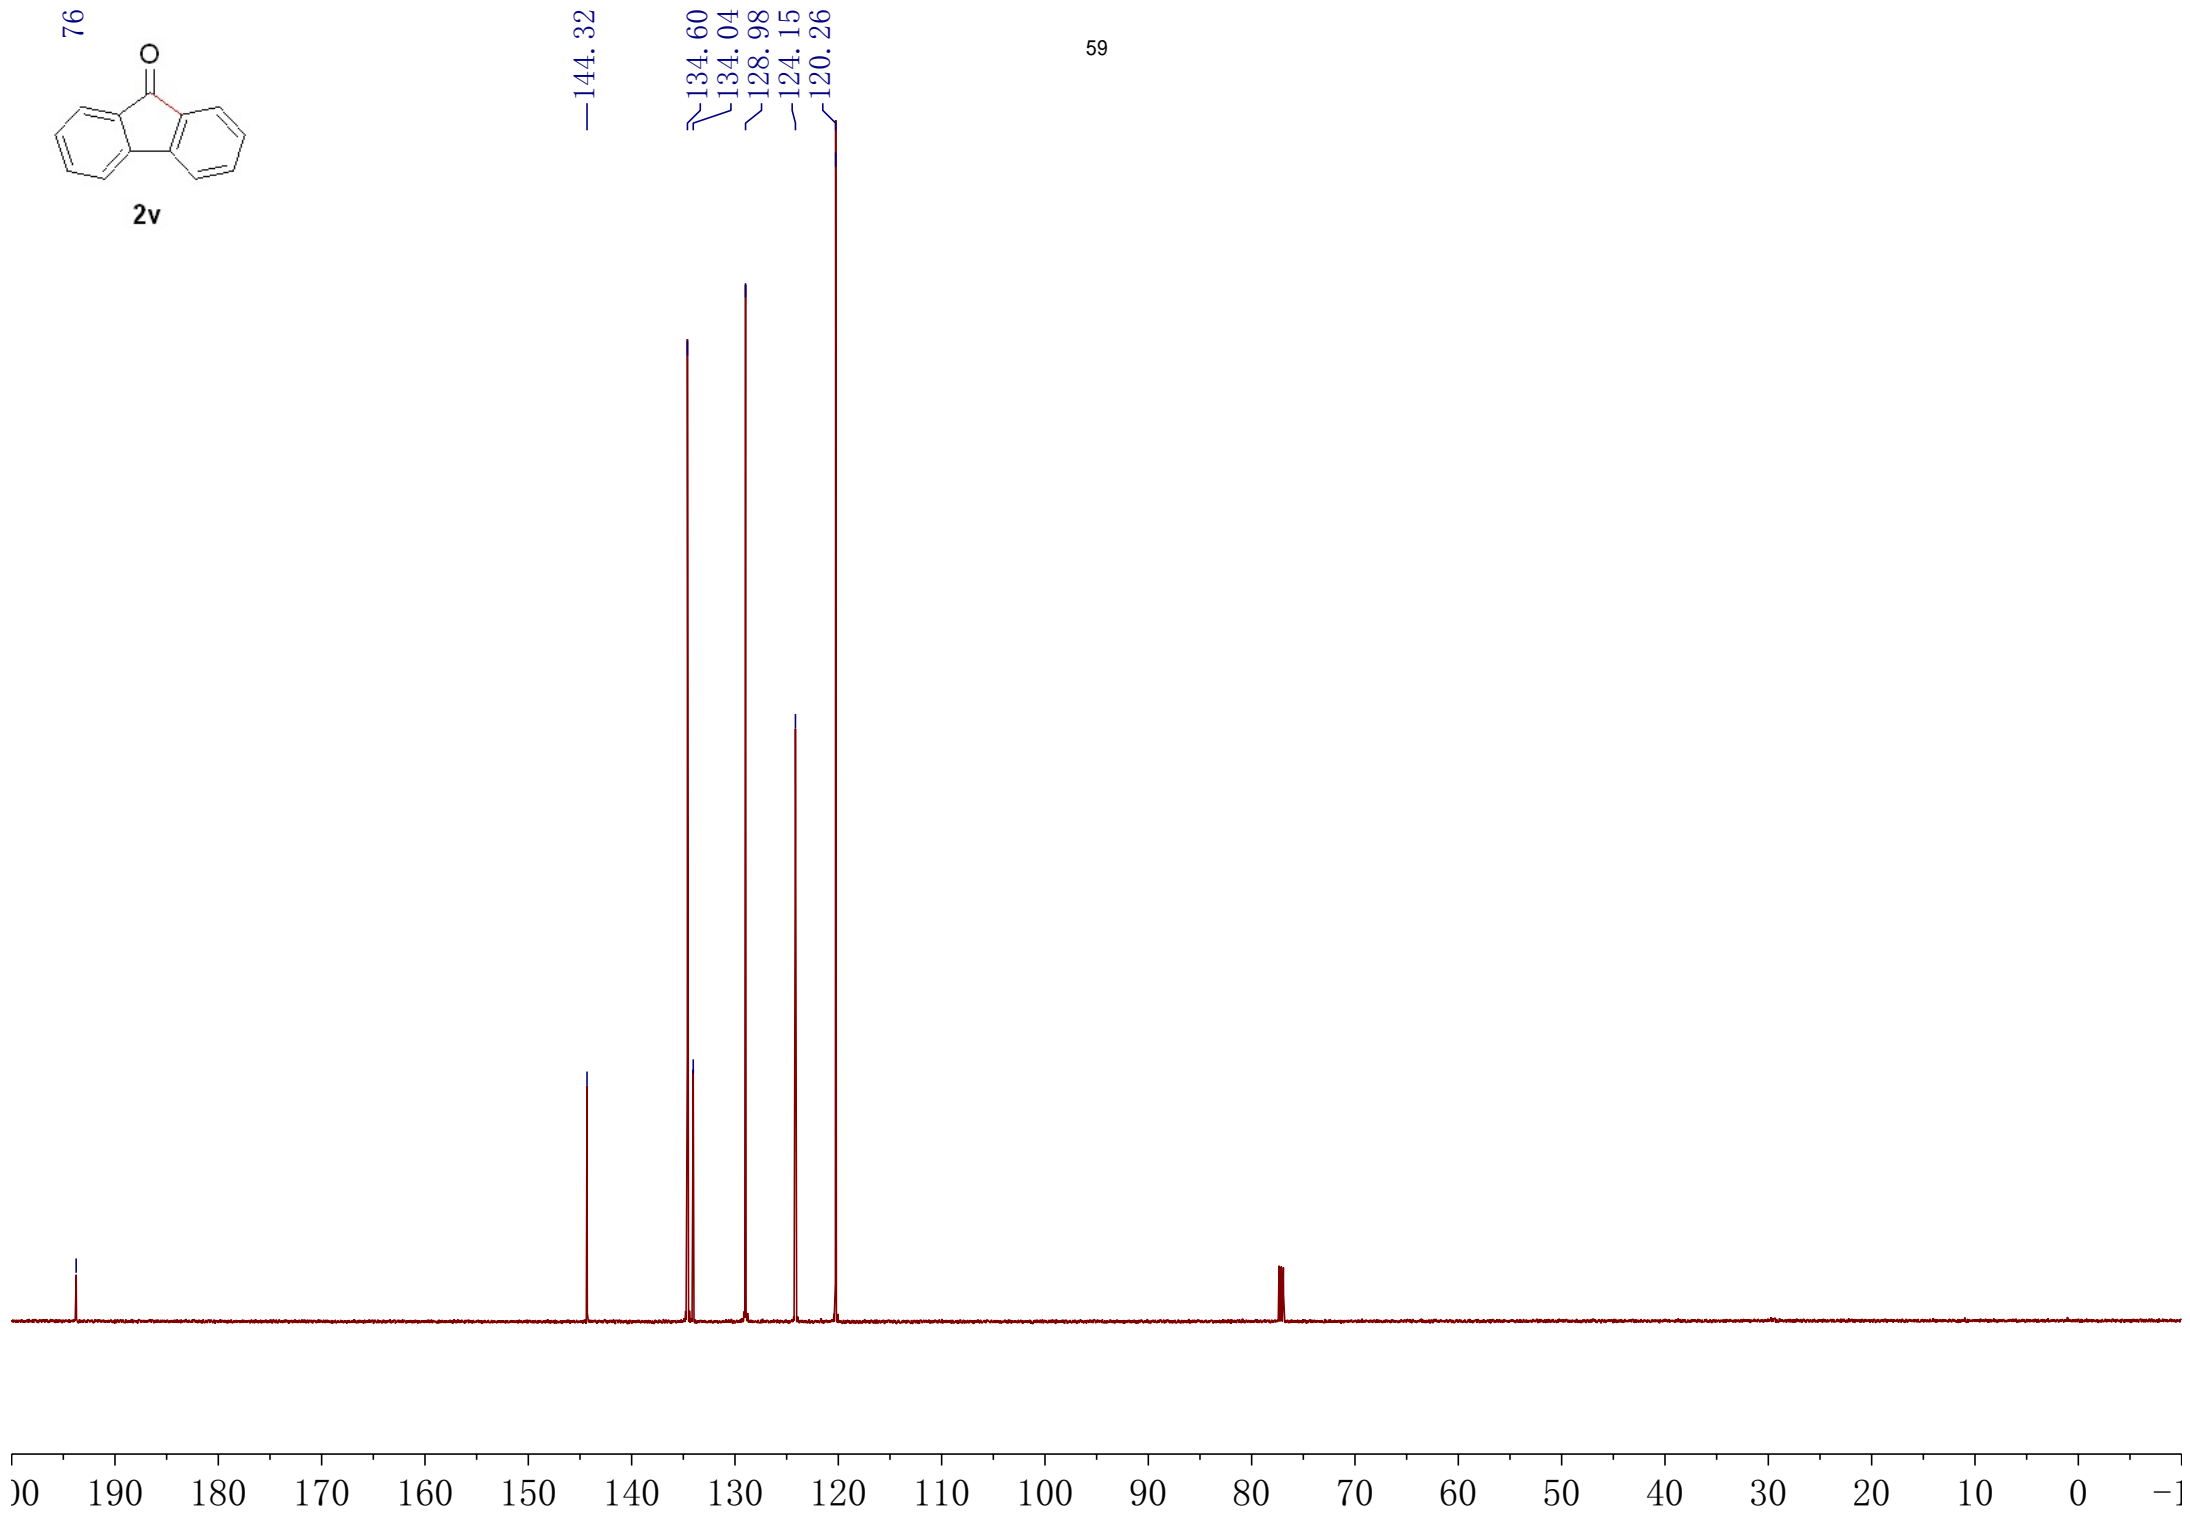

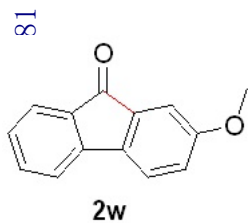

—160.83

—144.86

—136.97

—135.89

—134.82

—134.29

—127.85

—124.30

—121.30

—120.25

—119.54

—109.36

60

—55.71

200 190 180 170 160 150 140 130 120 110 100 90 80 70 60 50 40 30 20 10 0 -1

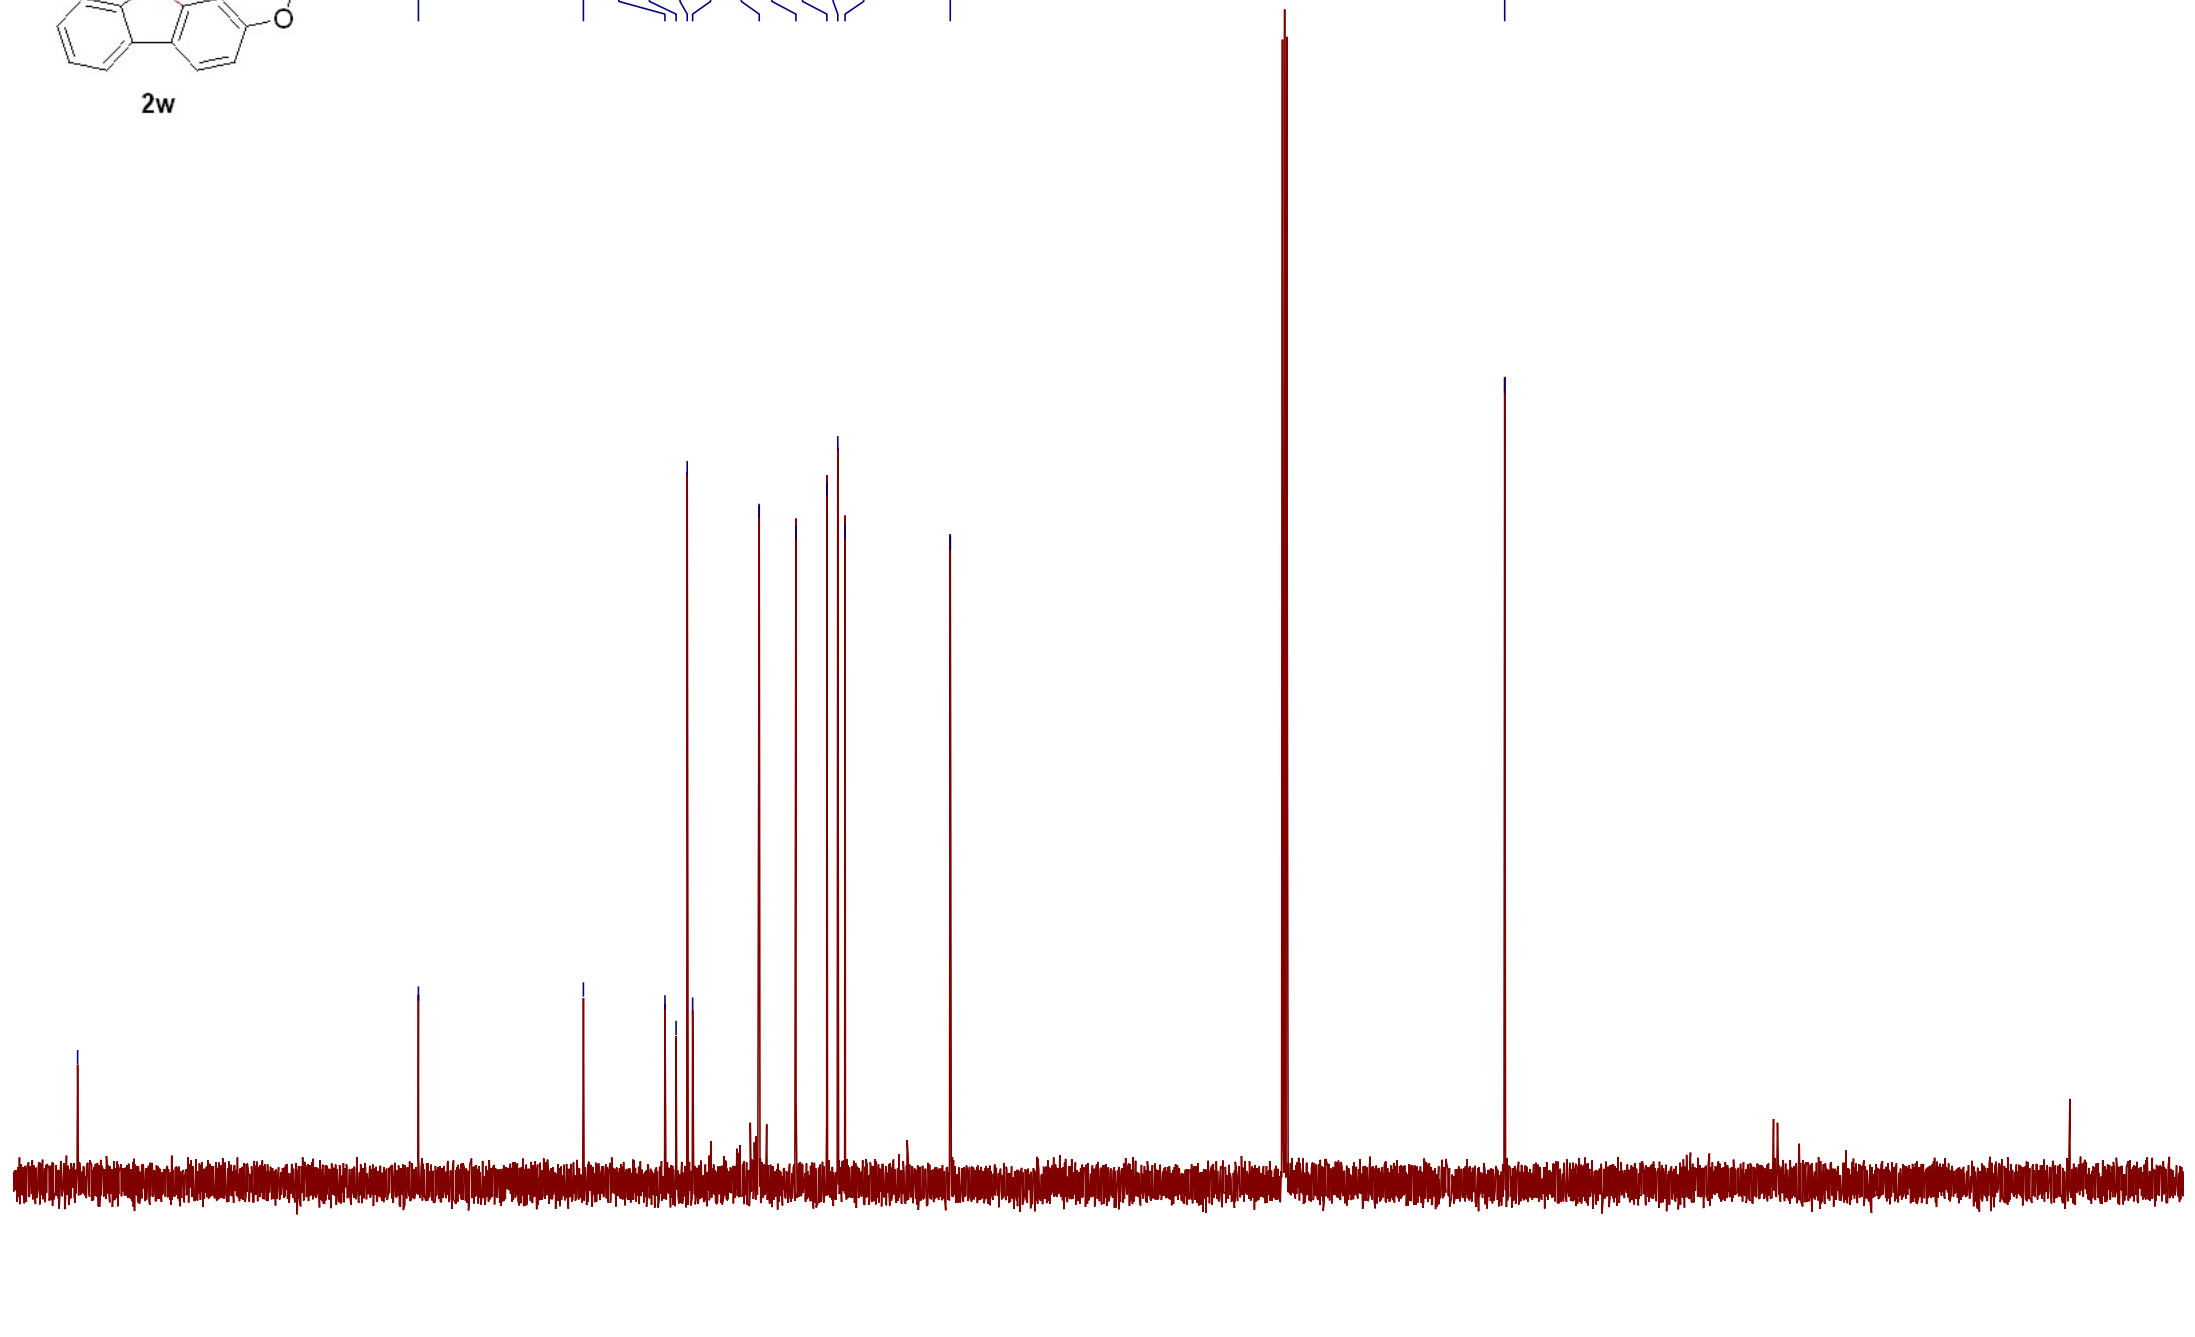

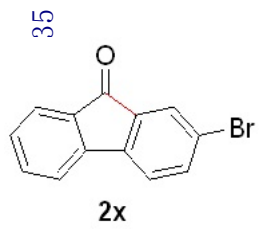

- 143.65
- 142.98
- 137.07
- 135.75
- 135.01
- 133.68
- 129.40
- 127.54
- 124.59
- 122.90
- 121.69
- 120.41

61



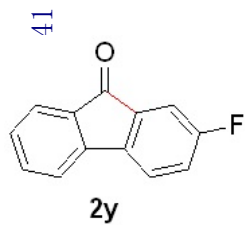

164.34  
162.69  
143.87  
140.13  
140.11  
136.31  
136.26  
135.00  
134.29  
134.28  
128.70  
124.56  
121.58  
121.53  
120.87  
120.72  
120.09  
120.08  
111.98  
111.82

62

190 180 170 160 150 140 130 120 110 100 90 80 70 60 50 40 30 20 10 0 -1

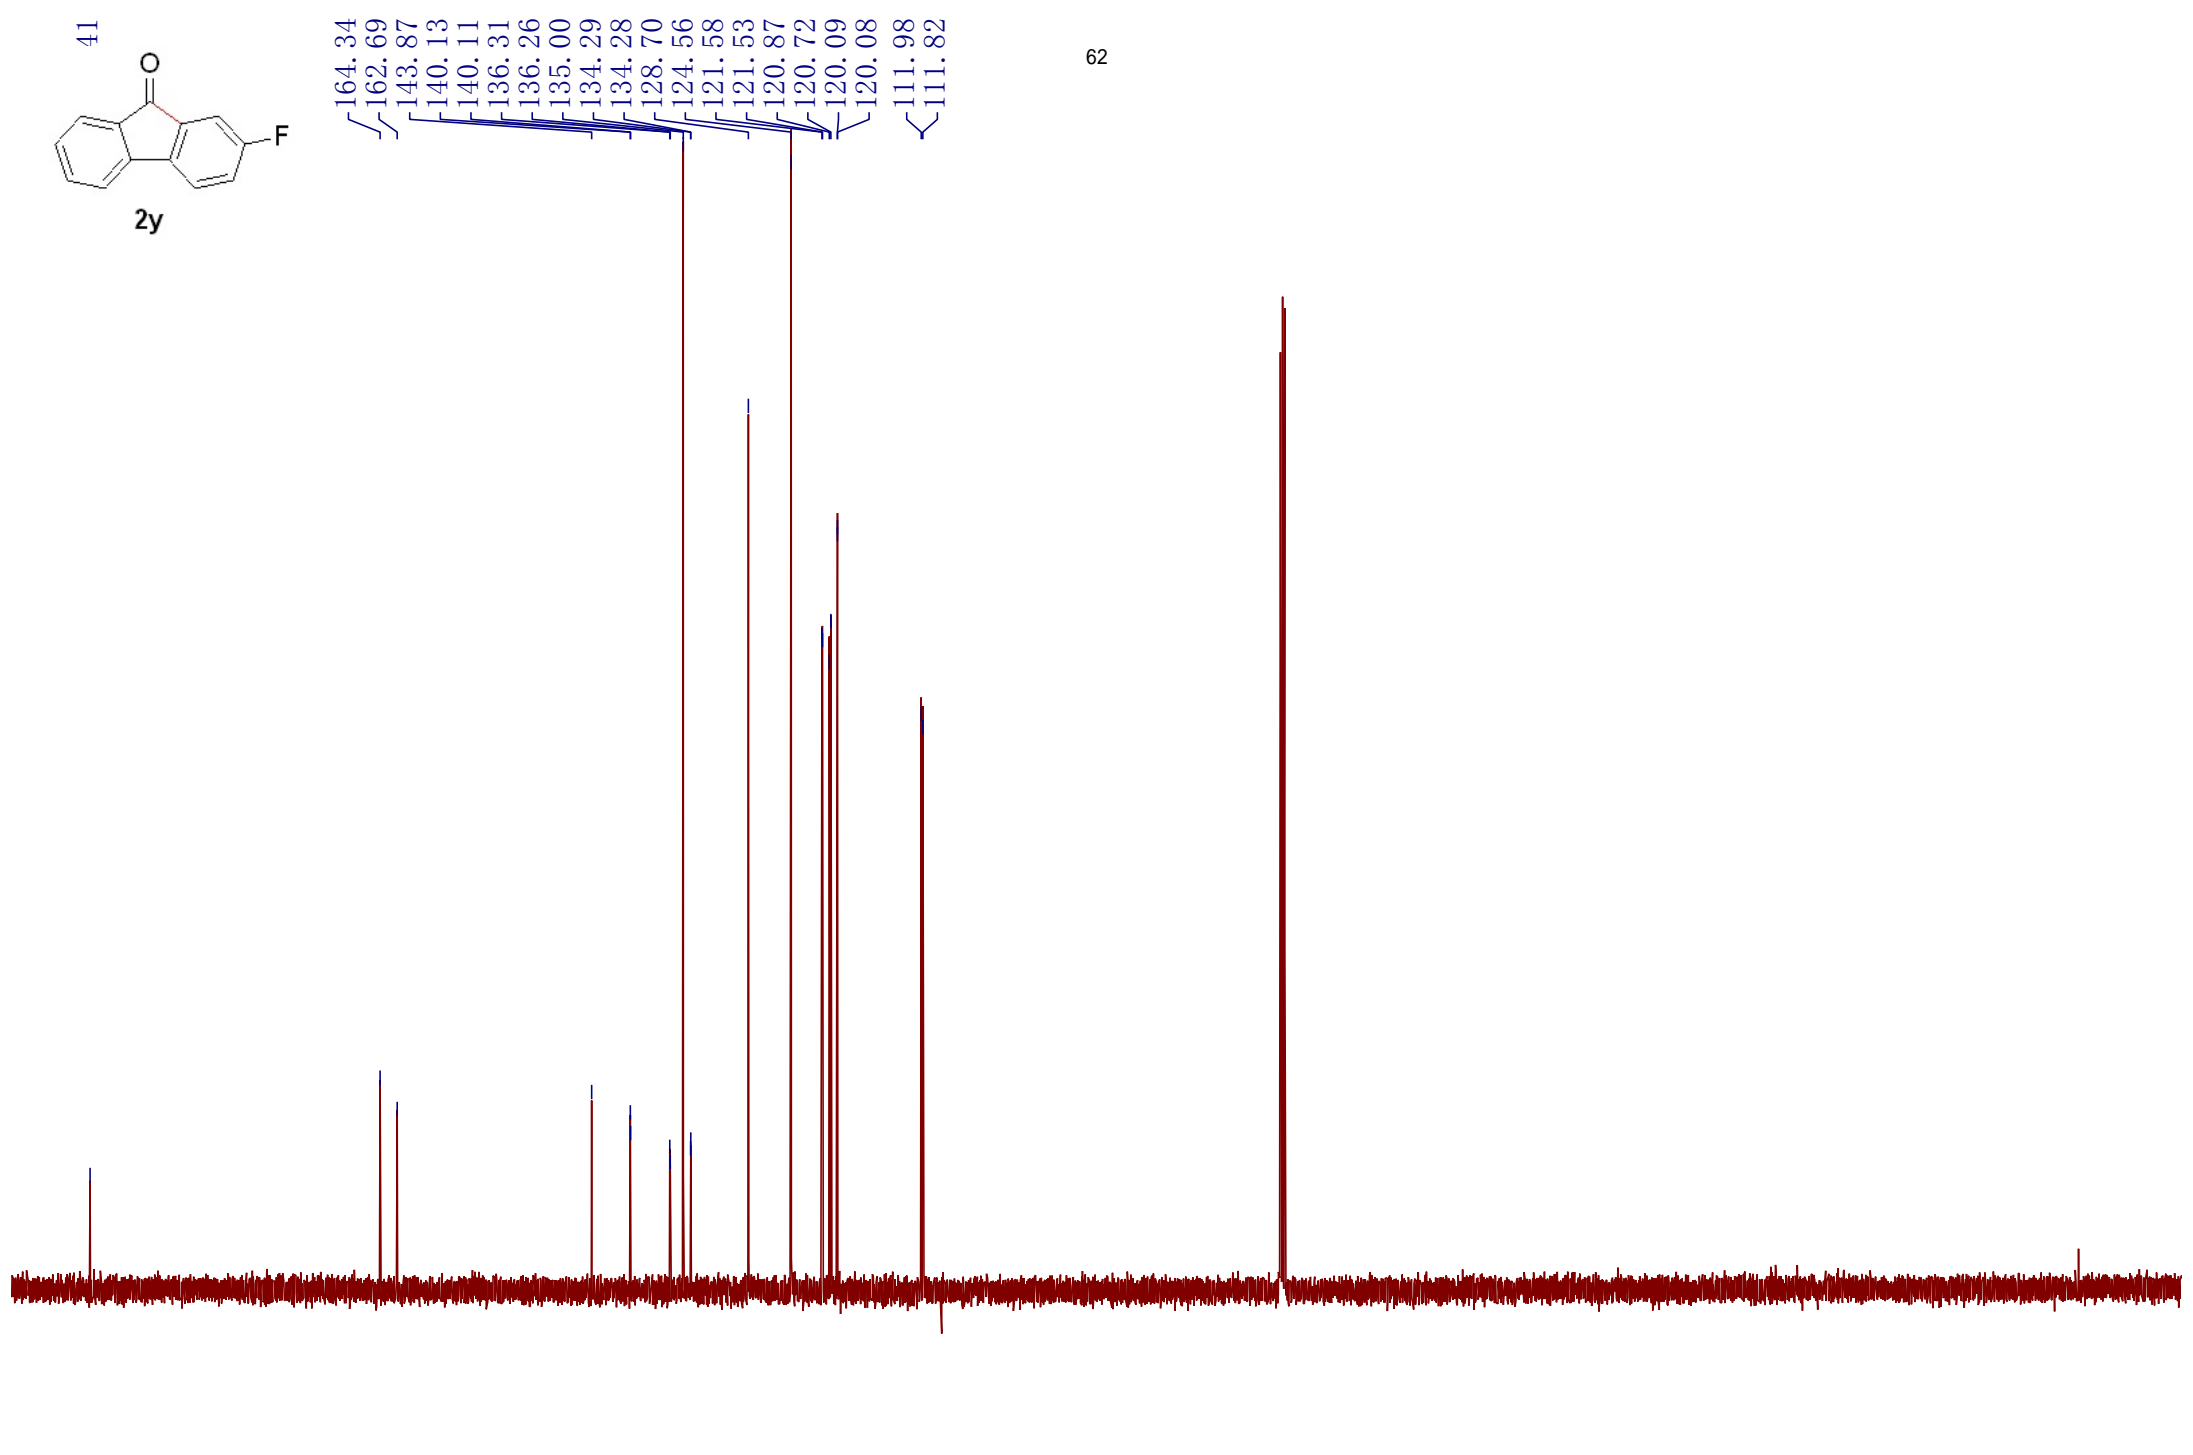

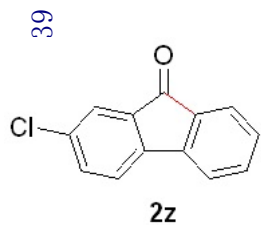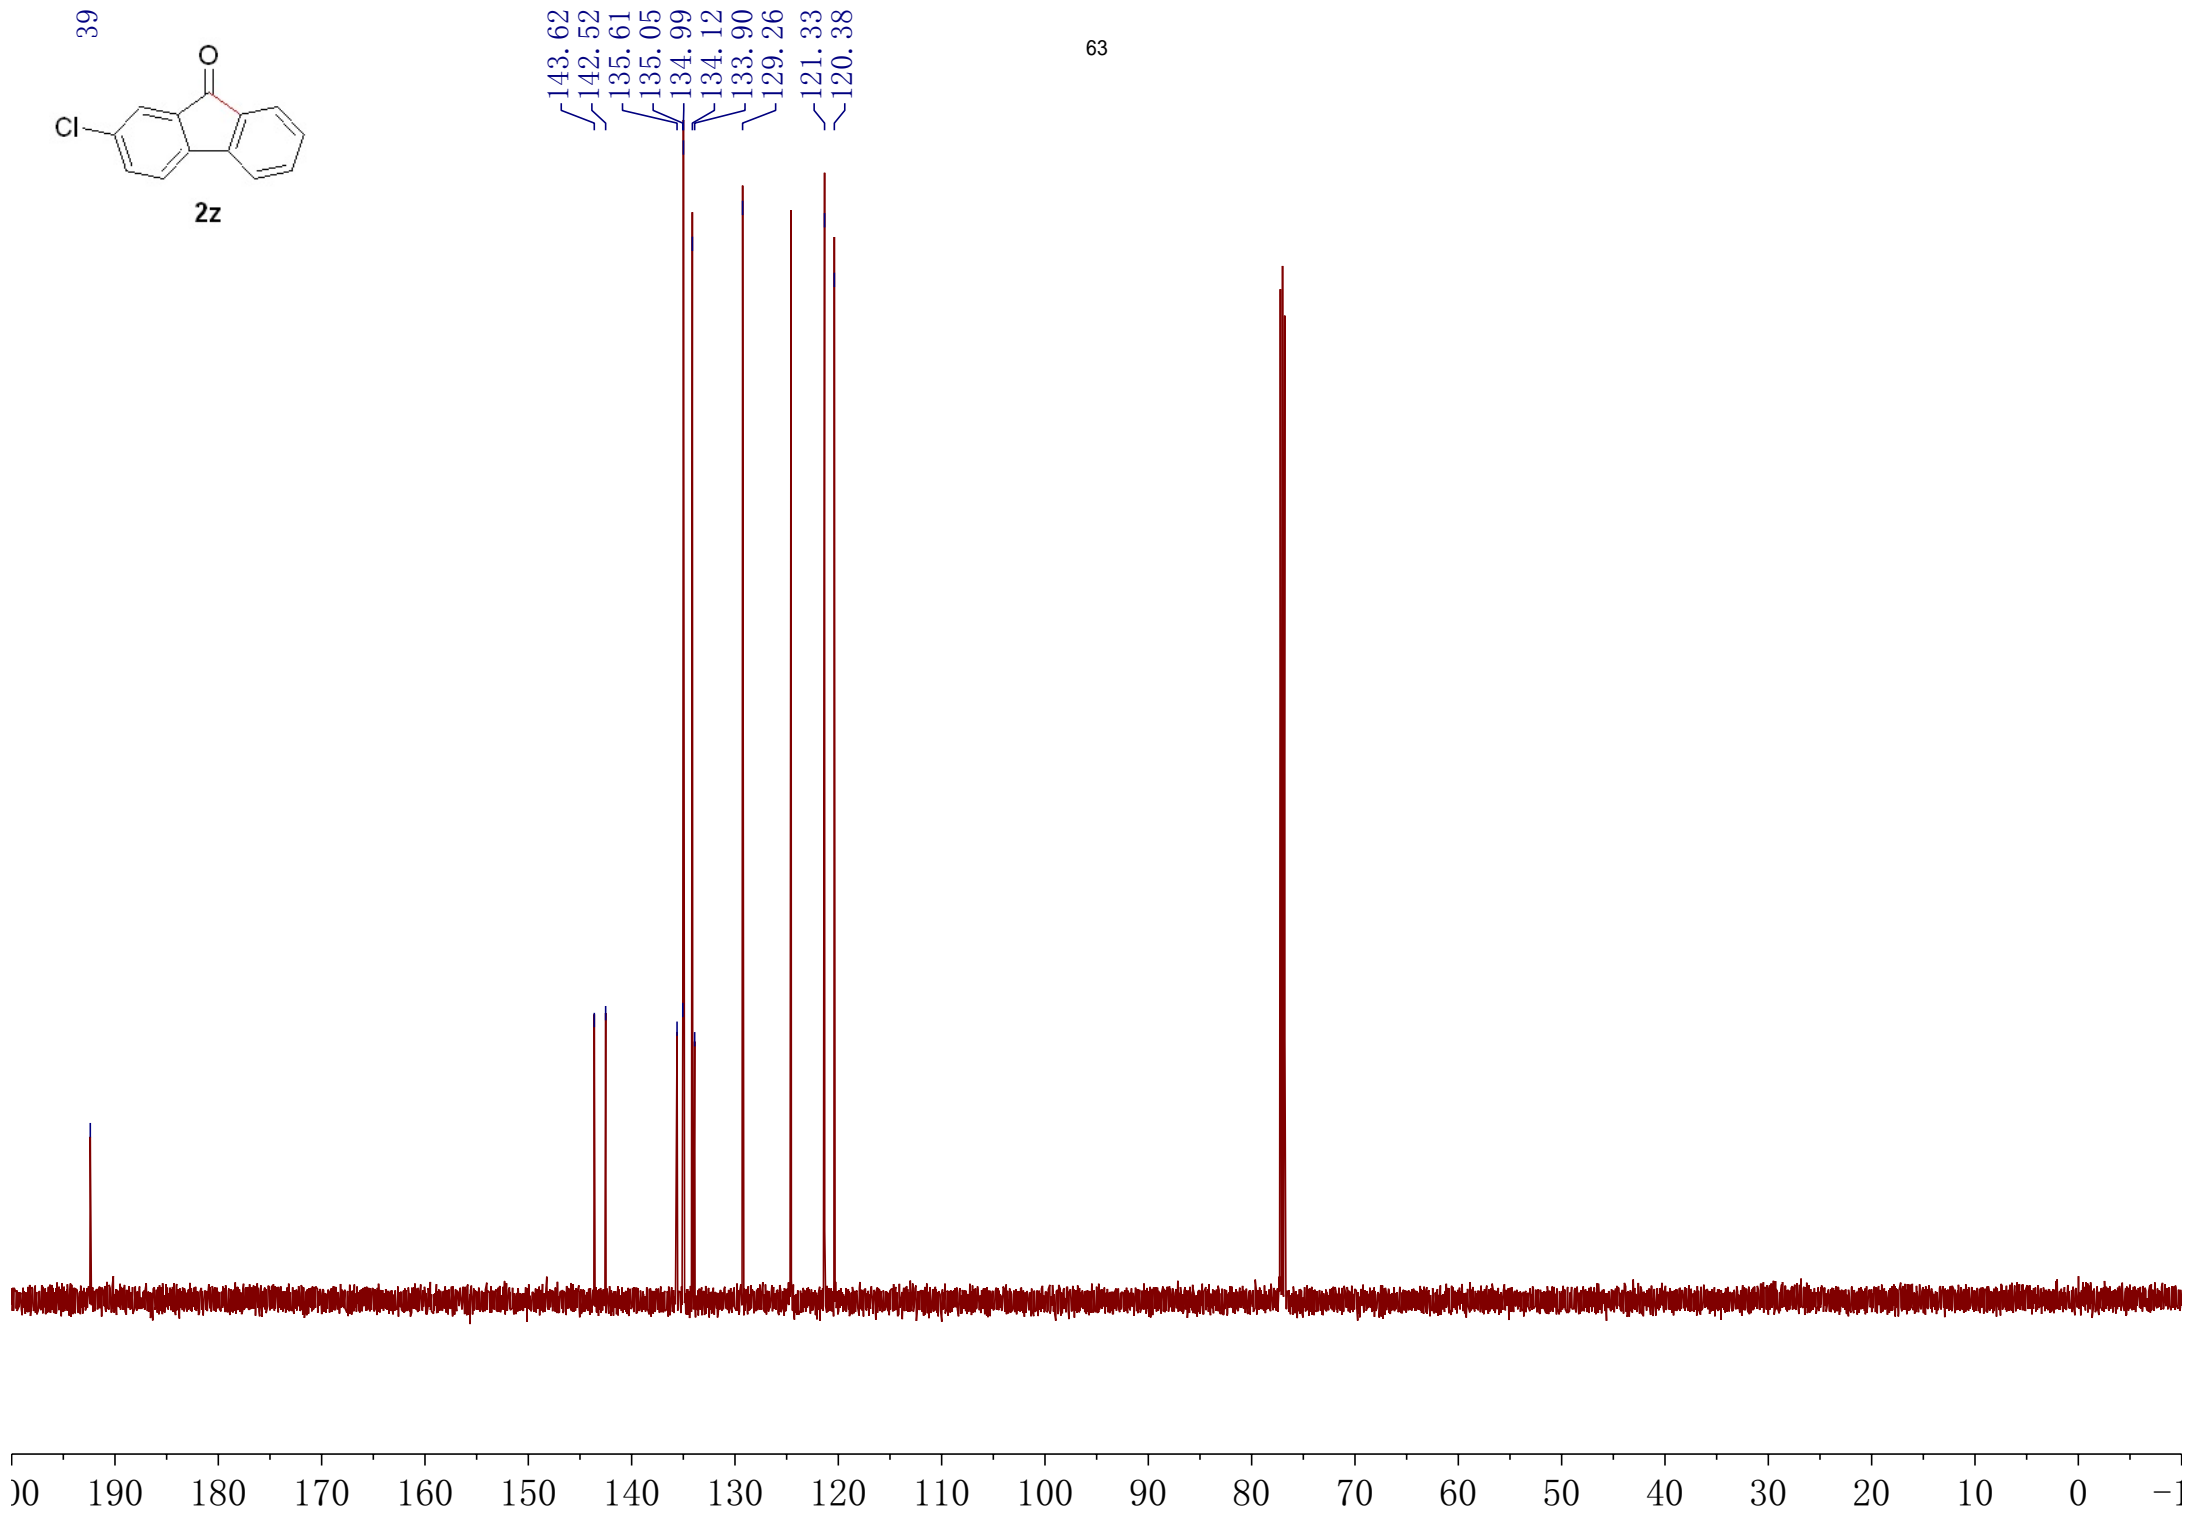

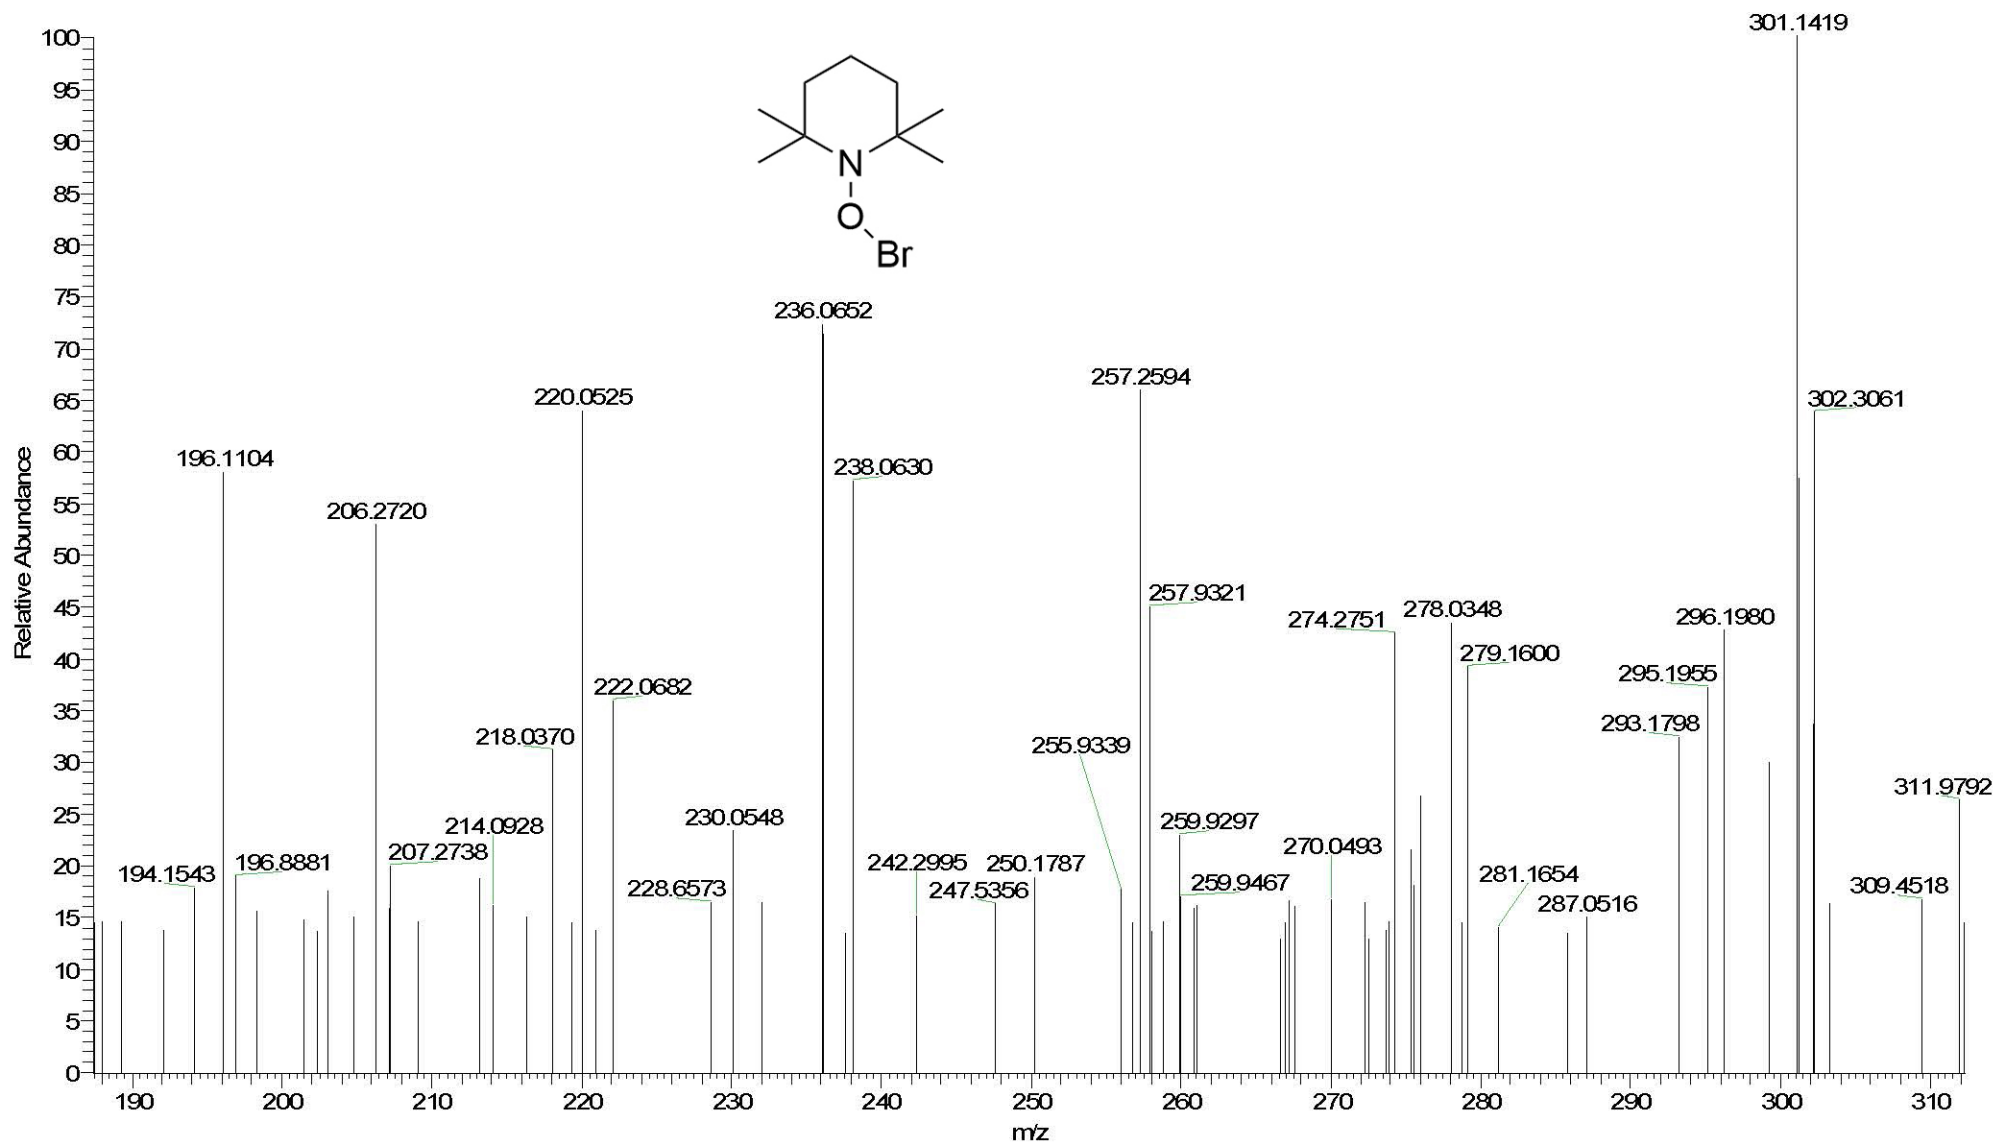



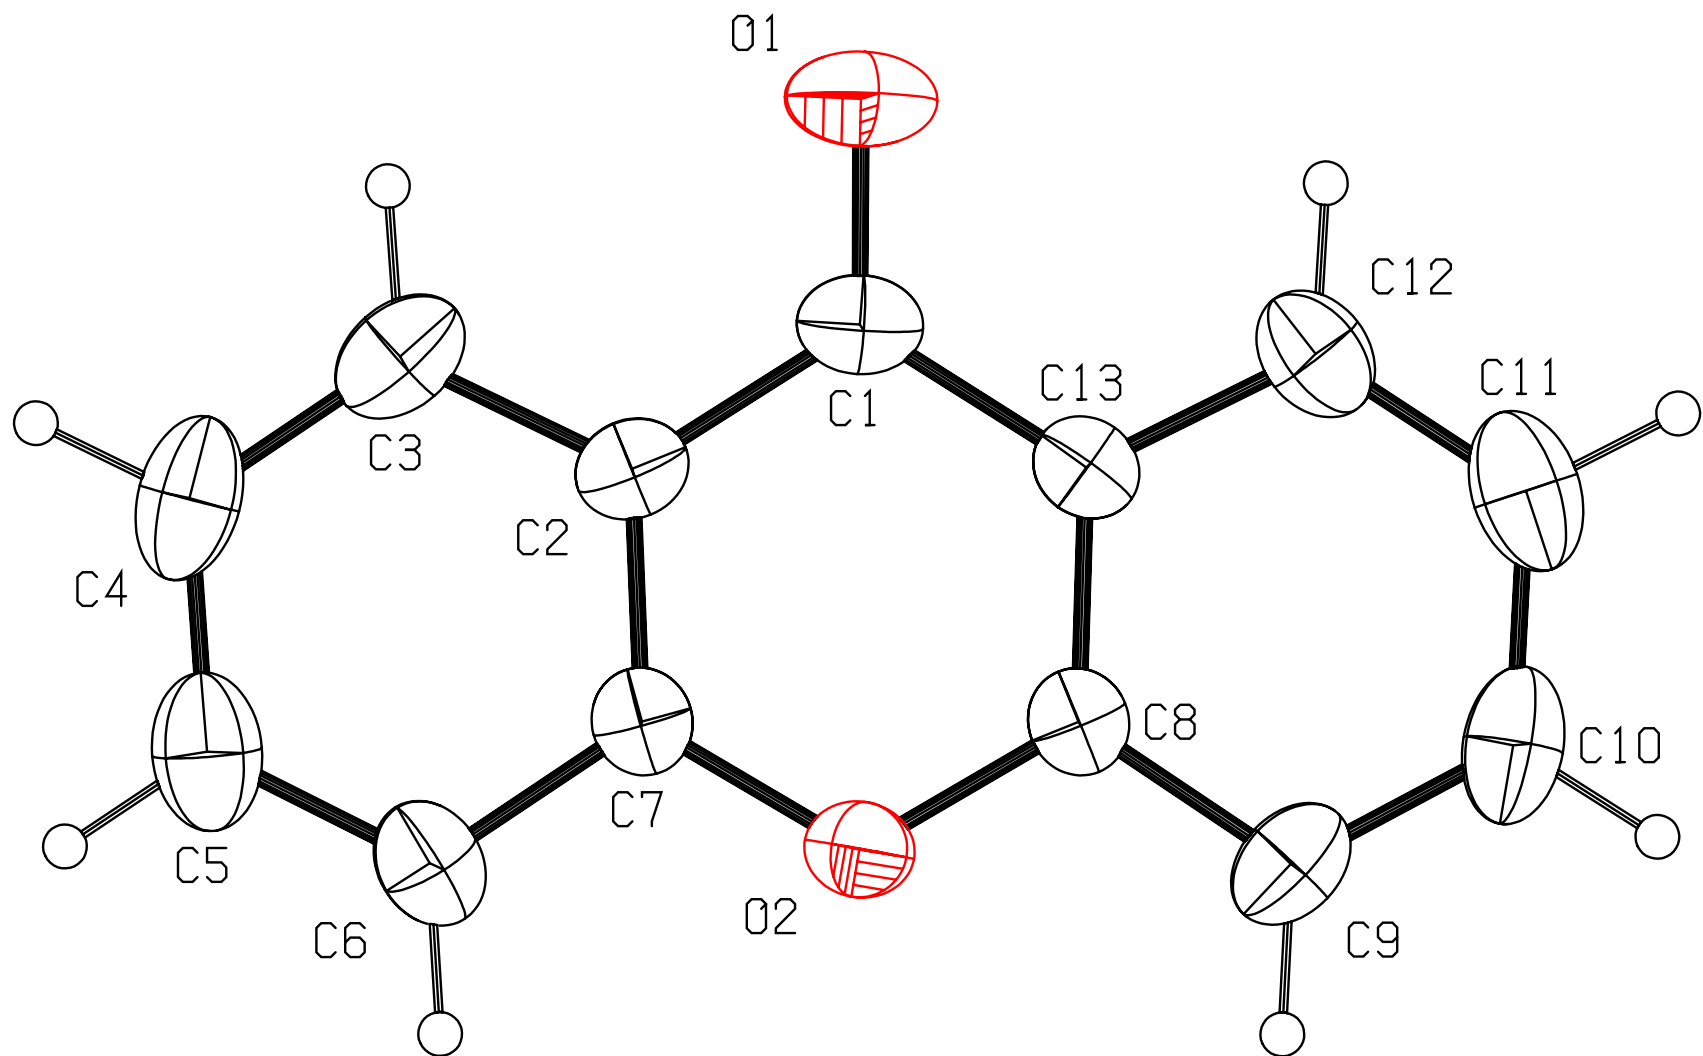

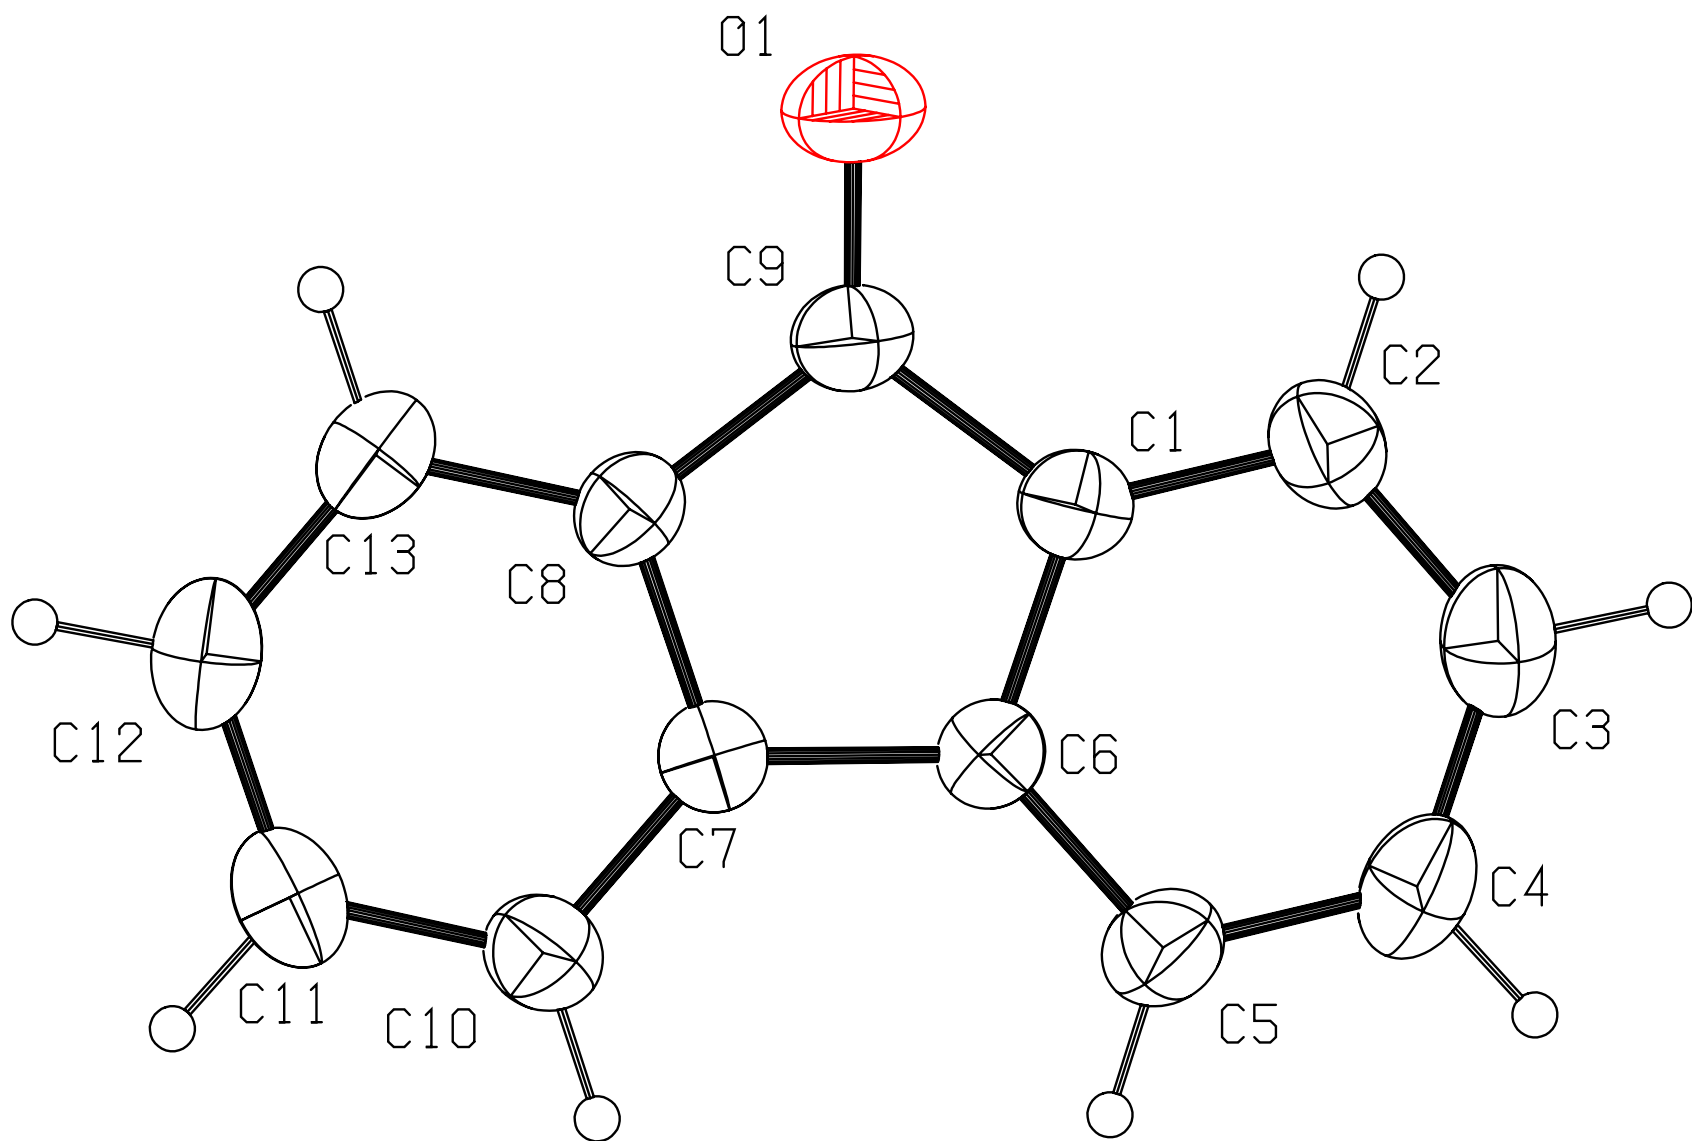

Supplement: c7ob00080d1.pdf [file c7ob00080d1.pdf]
